# Supplementary material for: Transcriptomic and network analysis identifies shared and unique pathways and immune changes across fibrotic interstitial lung diseases
Source: Aging (Albany NY). 2024 Feb 12;16(4):3200–30. doi: 10.18632/aging.205530 (PMC10929820; doi:10.18632/aging.205530)
Supplement: Supplementary Table 1 [file aging-16-205530-s002.xlsx]

## Sheet: DEGs_CHP
Supplementary Table 1. Differentially expressed genes of fHP.
hgnc_symbol	FoldChange	adjusted_P.value
A1BG	0.52699	1.22372e-06
A1BG-AS1	0.196398	0.0293785
A1CF	-0.0906762	0.89711
A2M	0.0277073	0.966631
A2M-AS1	0.347589	0.000130107
A2ML1	0.0569008	0.958934
A2MP1	-0.534707	0.00773575
A3GALT2	-0.730729	0.139106
A4GALT	0.360322	0.0230698
A4GNT	-0.659202	0.0332901
AAAS	0.22274	0.021942
AACS	0.101683	0.344564
AACSP1	-0.195946	0.205275
AADAC	0.648695	0.00529825
AADACL2	0.957148	0.240704
AADACL3	-0.175188	0.843608
AADACL4	-0.361184	0.67891
AADACP1	0.755999	0.0145846
AADAT	-0.172667	0.110289
AAGAB	0.213839	0.00414883
AAK1	-0.0433074	0.742257
AAMDC	-0.00244171	0.984135
AAMP	0.106988	0.436464
AANAT	0.188491	0.491622
AAR2	0.176073	0.0955023
AARD	-0.103555	0.662124
AARS1	0.0174593	0.945387
AARS2	0.0251217	0.793402
AARSD1	0.202855	0.00140829
AASDH	-2.91351	6.09972e-05
AASDHPPT	0.0664124	0.456722
AASS	-0.599098	0.0120457
AATBC	-0.112096	0.516129
AATF	0.127236	0.278945
AATK	-0.925273	2.37135e-06
ABALON	-0.124336	0.338845
ABAT	-0.034029	0.823176
ABCA1	-0.285705	0.162608
ABCA10	-0.222873	0.462393
ABCA11P	-0.0696516	0.463293
ABCA12	3.40885	3.1058e-06
ABCA13	0.762707	0.00533794
ABCA17P	-0.142963	0.749461
ABCA2	-0.142945	0.26489
ABCA3	-1.04423	0.00180539
ABCA4	0.533736	0.00124898
ABCA5	0.344591	0.104093
ABCA6	-0.729111	0.000118855
ABCA7	0.0733775	0.744637
ABCA8	-0.84038	0.00149783
ABCA9	-1.05177	0.0022491
ABCA9-AS1	-1.30302	0.0600145
ABCB1	0.385057	0.0209694
ABCB10	-0.102579	0.159284
ABCB11	0.983722	0.214257
ABCB4	1.664	0.0609172
ABCB5	-0.187168	0.6949
ABCB6	-0.308197	0.216363
ABCB7	-0.909897	0.0133381
ABCB8	0.104058	0.501239
ABCB9	0.333037	0.477492
ABCC1	-0.0475852	0.798809
ABCC10	-0.0113168	0.93483
ABCC11	-1.18111	0.00563161
ABCC12	-0.170674	0.864551
ABCC13	-1.65366	0.000192597
ABCC2	-0.136958	0.122983
ABCC3	0.284384	0.194148
ABCC4	-0.326132	0.0128076
ABCC5	-0.0438335	0.841007
ABCC5-AS1	0.583681	0.341973
ABCC6	-0.27796	0.0211868
ABCC6P1	-0.119634	0.519629
ABCC6P2	0.157902	0.145381
ABCC8	-0.608204	0.570132
ABCC9	-0.00546072	0.979015
ABCD1	0.150185	0.159175
ABCD2	0.428155	0.0130664
ABCD3	-0.00986018	0.956529
ABCD4	0.0911857	0.277303
ABCE1	0.171632	0.283042
ABCF1	0.0934914	0.53477
ABCF2	0.305515	0.027162
ABCF3	-0.0220035	0.886673
ABCG1	-0.470157	0.0265928
ABCG2	-0.197002	0.203061
ABCG4	0.715262	0.0309297
ABCG5	-0.142534	0.549747
ABCG8	0.213551	0.821514
ABHD1	-0.212175	0.0333976
ABHD10	0.188543	0.0254899
ABHD11	0.424033	5.50258e-05
ABHD12	0.304597	0.0196075
ABHD12B	1.85143	0.0335563
ABHD13	-0.0709628	0.545073
ABHD14A	0.269285	0.000556822
ABHD14A-ACY1	0.100088	0.940435
ABHD14B	-0.104059	0.446453
ABHD15	0.0851632	0.355749
ABHD16A	0.0569099	0.685573
ABHD16B	0.129214	0.612181
ABHD17A	-0.273675	0.105505
ABHD17B	-0.0337686	0.714878
ABHD17C	-0.0320706	0.86041
ABHD18	-0.0266682	0.735333
ABHD2	0.052293	0.859282
ABHD3	-0.00271067	0.987815
ABHD4	-0.0151411	0.926821
ABHD5	-0.461186	0.000702091
ABHD6	-0.045326	0.734459
ABHD8	0.0433059	0.695641
ABI1	-0.976532	0.0350528
ABI2	-0.123788	0.31999
ABI3	0.122654	0.40526
ABI3BP	-0.15829	0.45728
ABITRAM	0.0724048	0.43413
ABL1	0.216328	0.351472
ABL2	0.178864	0.415757
ABLIM1	-0.141005	0.461338
ABLIM2	0.314903	0.022576
ABLIM3	-0.0554509	0.792124
ABO	-0.181189	0.28426
ABR	-0.0746469	0.731347
ABRA	0.313525	0.277169
ABRACL	0.313651	0.00306308
ABRAXAS1	0.0361808	0.652552
ABRAXAS2	0.0198503	0.779878
ABT1	0.153781	0.0583568
ABTB1	-0.353725	0.0340401
ABTB2	0.0315181	0.863424
ACAA1	-0.0702711	0.658782
ACAA2	-0.0366468	0.848672
ACACA	-0.00770358	0.971423
ACACB	-0.374495	0.0196823
ACAD10	0.198115	0.0110726
ACAD11	0.0298813	0.88064
ACAD8	-0.0663268	0.720099
ACAD9	0.054945	0.637575
ACADL	-0.807236	5.40926e-05
ACADM	0.13402	0.447854
ACADS	0.116997	0.313912
ACADSB	-0.0525747	0.764692
ACADVL	0.0841051	0.775227
ACAN	2.12759	0.00749657
ACAP1	0.492488	0.000982113
ACAP2	-0.281292	0.0244304
ACAP3	0.576706	0.000123526
ACAT1	-0.239032	0.100446
ACAT2	-0.229383	0.102497
ACBD3	-0.0732466	0.584234
ACBD4	0.0981582	0.465418
ACBD5	-0.689167	0.0145433
ACBD6	-0.0144793	0.886849
ACBD7	0.143084	0.362143
ACCS	-0.188655	0.323077
ACCSL	-0.313491	0.629124
ACD	0.138729	0.093028
ACE	-0.48043	0.0647348
ACE2	0.392433	0.305986
ACER1	0.304009	0.346687
ACER2	0.0139751	0.931597
ACER3	-0.292907	0.0151638
ACHE	0.335221	0.265369
ACIN1	1.30887	0.00120103
ACKR1	0.930614	0.000609139
ACKR2	0.125181	0.710912
ACKR3	-0.0305352	0.911752
ACKR4	-0.613942	2.6637e-05
ACLY	-0.217568	0.347997
ACMSD	0.295792	0.772989
ACO1	0.0260738	0.888038
ACO2	0.124036	0.424424
ACOD1	0.694346	0.508954
ACOT1	-0.190908	0.259459
ACOT11	-0.0439842	0.754481
ACOT12	0.2656	0.781459
ACOT13	-0.0317356	0.757561
ACOT2	-0.134454	0.289071
ACOT4	0.0428624	0.79106
ACOT6	0.0343219	0.974161
ACOT7	0.344145	0.000374572
ACOT8	0.107489	0.177626
ACOT9	-0.26058	0.00301586
ACOX1	-0.0667588	0.591712
ACOX2	-0.231171	0.0608539
ACOX3	0.188799	0.00381725
ACOXL	-0.443941	0.0213577
ACOXL-AS1	-0.513353	0.00078673
ACP1	0.00207033	0.991516
ACP2	0.493805	0.000335868
ACP3	-0.299425	0.0319313
ACP4	-0.363011	0.244027
ACP5	0.408125	0.220642
ACP6	-0.0936188	0.535811
ACP7	0.699187	0.538566
ACR	-0.509456	0.00430485
ACRBP	0.0380522	0.819247
ACRV1	1.82529	0.00274968
ACSBG1	0.219855	0.220952
ACSBG2	-0.768901	0.385227
ACSF2	-0.0857488	0.523462
ACSF3	-0.00452516	0.97972
ACSL1	-0.899334	0.00352792
ACSL3	-0.464802	0.075705
ACSL4	-0.0711472	0.80813
ACSL5	-0.0694044	0.843684
ACSL6	-0.00263443	0.998334
ACSM1	-0.109272	0.820208
ACSM2A	-0.0441963	0.716415
ACSM2B	-0.418413	0.00313166
ACSM3	-0.637792	0.0345721
ACSM4	-0.606947	0.0961079
ACSM5	-0.162359	0.418422
ACSM6	-0.752933	0.0561174
ACSS1	-0.469003	0.0523894
ACSS2	-0.325837	0.0492765
ACSS3	-0.296105	0.00691901
ACTA1	-0.299198	0.615444
ACTA2	0.69518	0.0217374
ACTB	0.187317	0.72246
ACTBL2	2.13501	0.000205672
ACTC1	0.574614	0.119977
ACTE1P	-0.8339	0.102237
ACTG1	0.190183	0.673993
ACTG1P17	0.198438	0.131275
ACTG1P25	-0.0453857	0.88119
ACTG2	1.06884	0.000116502
ACTL6A	-0.0663494	0.602906
ACTL6B	0.170616	0.787823
ACTL7A	-0.127108	0.891833
ACTL7B	-0.483172	0.579721
ACTL8	0.478575	0.322466
ACTL9	0.275878	0.628133
ACTN1	0.474519	0.0231991
ACTN1-DT	0.358879	0.463169
ACTN2	-0.429615	0.337563
ACTN3	0.413854	0.417121
ACTN4	-0.179198	0.584687
ACTR10	-0.220075	0.0395029
ACTR1A	0.105604	0.618987
ACTR1B	-0.00798949	0.96357
ACTR2	-0.0923994	0.755772
ACTR3	0.134233	0.505431
ACTR3B	0.221054	0.0143557
ACTR3BP6	0.272007	0.472642
ACTR3C	0.0754462	0.670245
ACTR5	0.0826506	0.145007
ACTR6	0.104814	0.210867
ACTR8	-0.0415252	0.689555
ACTRT1	-0.308111	0.529897
ACTRT2	0.429145	0.398602
ACTRT3	0.051229	0.725419
ACVR1	0.116498	0.251866
ACVR1B	0.0285519	0.892868
ACVR1C	-0.134175	0.4695
ACVR2A	0.516731	0.174029
ACVR2B	-0.0847313	0.346497
ACVR2B-AS1	-0.0545538	0.624867
ACVRL1	-0.87347	0.000536044
ACY1	0.0537801	0.706366
ACY3	1.08708	2.40494e-08
ACYP1	0.0937677	0.408383
ACYP2	0.131127	0.0437394
ADA	0.454377	0.00167538
ADA2	-0.479641	0.277297
ADAD1	0.333968	0.333613
ADAD2	0.346357	0.748938
ADAL	-0.211835	0.144742
ADAM10	-0.0425737	0.811557
ADAM11	0.0564796	0.94453
ADAM12	0.778048	2.26302e-06
ADAM15	-1.85726	0.00703342
ADAM17	-0.465274	0.00183083
ADAM18	0.213238	0.746622
ADAM19	0.378652	0.0170085
ADAM2	-0.0863259	0.839057
ADAM20	-0.369067	0.0946127
ADAM20P1	-1.1016	0.00310238
ADAM21	-0.648562	0.015791
ADAM21P1	-0.958004	0.186899
ADAM22	-0.583556	0.252899
ADAM23	0.83432	3.90684e-07
ADAM28	0.708413	2.04409e-08
ADAM29	-2.24909	6.70557e-06
ADAM30	-0.0920851	0.842818
ADAM32	-0.24679	0.0106616
ADAM33	0.191016	0.278262
ADAM3A	-0.122566	0.874992
ADAM5	-0.0369954	0.965256
ADAM6	0.0408451	0.922574
ADAM7	0.00844539	0.986363
ADAM7-AS2	0.192549	0.470252
ADAM8	0.408657	0.0214522
ADAM9	-0.271779	0.202939
ADAMDEC1	1.02479	0.158043
ADAMTS1	-0.456398	0.211072
ADAMTS10	0.250548	0.186179
ADAMTS12	-0.243417	0.102893
ADAMTS13	-0.222164	0.237558
ADAMTS14	1.84525	0.000978622
ADAMTS15	0.0460226	0.870081
ADAMTS16	1.69927	5.77942e-08
ADAMTS16-DT	1.84744	0.00819138
ADAMTS17	-0.271607	0.0181985
ADAMTS18	1.06121	1.34095e-06
ADAMTS19	1.40208	0.0345689
ADAMTS19-AS1	1.41285	0.0436533
ADAMTS2	-0.0399499	0.892833
ADAMTS20	0.506836	0.574794
ADAMTS3	0.27787	0.0661502
ADAMTS4	0.292249	0.614064
ADAMTS5	0.194533	0.249227
ADAMTS6	-0.117226	0.627824
ADAMTS7	-0.287436	0.0411634
ADAMTS8	-0.754636	0.001099
ADAMTS9	0.554412	0.127145
ADAMTS9-AS1	0.295816	0.514713
ADAMTSL1	0.75873	0.409476
ADAMTSL2	0.00332018	0.990617
ADAMTSL3	-0.603846	3.52118e-05
ADAMTSL4	-0.689032	0.159152
ADAMTSL5	0.26482	0.00949388
ADAP1	0.0832222	0.824374
ADAP2	0.222663	0.122878
ADAR	0.0306418	0.919306
ADARB1	-0.569088	0.000141893
ADARB2	-0.837662	2.68939e-07
ADARB2-AS1	-0.725398	0.235025
ADAT1	-0.127641	0.109733
ADAT2	-0.0919411	0.417944
ADAT3	0.457037	0.000134376
ADCK1	1.46173	0.0473535
ADCK2	0.0743405	0.415811
ADCK5	0.177045	0.126758
ADCY1	-0.193604	0.178681
ADCY10	0.0544771	0.958594
ADCY10P1	-0.123182	0.321078
ADCY2	0.549987	0.000331938
ADCY3	-0.0792932	0.72246
ADCY4	-0.648036	0.000224771
ADCY5	0.287591	0.0622714
ADCY6	0.130124	0.457049
ADCY6-DT	-0.265341	0.750186
ADCY7	-0.349122	0.0760025
ADCY8	-1.72068	5.53996e-05
ADCY9	-0.351607	0.011168
ADCYAP1	1.23522	0.0194135
ADCYAP1R1	-0.258256	0.689559
ADD1	-0.175976	0.453265
ADD2	0.313547	0.0548461
ADD3	-0.274329	0.134747
ADD3-AS1	-0.18131	0.147402
ADGB	1.90479	0.0521564
ADGB-DT	0.0785141	0.853612
ADGRA1	1.00173	0.121989
ADGRA2	0.0401981	0.875491
ADGRA3	0.300889	0.00122316
ADGRB1	0.0521161	0.659032
ADGRB2	1.22393	0.0124838
ADGRB3	-1.03725	7.66624e-05
ADGRD1	-0.755525	9.43928e-05
ADGRD2	-0.234627	0.0394244
ADGRE1	-2.62947	1.14064e-05
ADGRE2	-0.105241	0.661077
ADGRE3	-1.7894	8.90145e-05
ADGRE4P	-0.156287	0.546563
ADGRE5	0.291083	0.236265
ADGRF1	0.795351	0.00178263
ADGRF2	-0.335928	0.651512
ADGRF3	0.0539733	0.927125
ADGRF4	2.21587	0.0110555
ADGRF5	-0.606162	0.0148819
ADGRG1	-0.0248167	0.946567
ADGRG2	-1.37647	0.10662
ADGRG3	-0.835668	0.038256
ADGRG4	-0.24794	0.792049
ADGRG5	1.11369	0.0405851
ADGRG6	-0.655561	0.00120678
ADGRG7	0.0380828	0.960998
ADGRL1	0.117296	0.422442
ADGRL1-AS1	-0.288342	0.00014832
ADGRL2	-1.15205	1.05343e-05
ADGRL3	-0.23635	0.184925
ADGRL4	0.123959	0.563162
ADGRV1	-1.12431	0.00937598
ADH1A	-0.656203	0.431972
ADH1B	-0.884251	0.00255018
ADH1C	0.347022	0.042811
ADH4	0.531231	0.642722
ADH5	-0.0939241	0.575705
ADH6	0.303915	0.620277
ADH7	2.11066	0.00596271
ADHFE1	-0.323032	0.0464611
ADI1	0.0616315	0.760849
ADIG	0.242589	0.595626
ADIPOQ	0.758997	0.187658
ADIPOQ-AS1	-0.307535	0.282448
ADIPOR1	-0.153439	0.43165
ADIPOR2	-0.531862	0.0111127
ADIRF	-0.326974	0.153697
ADK	-0.152583	0.158955
ADM	-0.407035	0.215886
ADM2	0.803085	1.43244e-06
ADM5	0.360203	0.00981018
ADNP	-1.78821	0.000514421
ADNP-AS1	-0.0547182	0.592597
ADNP2	-0.164546	0.123885
ADO	0.0968155	0.210831
ADORA1	1.90186	0.0518217
ADORA2A	-0.224481	0.238984
ADORA2A-AS1	-0.492675	0.00113068
ADORA2B	0.39817	0.00687824
ADORA3	0.298389	0.185102
ADPGK	-0.245341	0.100347
ADPGK-AS1	-0.122858	0.574627
ADPRH	-0.205974	0.0638133
ADPRHL1	0.0365523	0.911387
ADPRM	-0.00408664	0.97847
ADPRS	0.305375	0.00167291
ADRA1A	-2.05704	2.45221e-09
ADRA1B	-0.764711	3.68181e-05
ADRA1D	-0.327915	0.0466668
ADRA2A	0.529135	0.000913038
ADRA2B	0.249767	0.169349
ADRA2C	0.187038	0.270421
ADRB1	-0.860553	1.72724e-05
ADRB2	-0.617379	6.41733e-05
ADRB3	-0.127487	0.74262
ADRM1	0.16863	0.27933
ADSL	-0.150735	0.688344
ADSS1	0.231235	0.0395927
ADSS2	0.137897	0.129631
ADTRP	-0.465271	0.055508
AEBP1	-0.0759896	0.825438
AEBP2	-0.148738	0.125775
AEN	0.330809	0.0240497
AFAP1	-0.440454	0.216407
AFAP1-AS1	0.216938	0.130615
AFAP1L1	-0.906011	1.44729e-06
AFAP1L2	0.134315	0.333818
AFDN	-0.553422	0.000158663
AFF1	-0.356067	0.0341015
AFF2	-0.739179	5.00384e-06
AFF3	-1.23811	4.64886e-11
AFF4	-0.258437	0.219656
AFG1L	-0.0253766	0.783322
AFG3L1P	0.154653	0.201926
AFG3L2	0.0659478	0.595626
AFM	-0.0255432	0.96665
AFMID	-0.078238	0.580468
AFP	0.94028	0.15554
AFTPH	-0.221286	0.0416519
AFTPH-DT	0.502893	3.5834e-05
AGA	0.186421	0.010001
AGAP1	-0.172933	0.729997
AGAP1-IT1	-1.3776	4.08163e-05
AGAP12P	0.0418865	0.906817
AGAP2	0.224778	0.0421778
AGAP2-AS1	0.213855	0.048019
AGAP3	0.414177	0.00382436
AGAP4	0.226092	0.131932
AGAP5	-0.565578	0.00751896
AGAP6	0.103433	0.47131
AGAP9	-0.106274	0.625878
AGBL1	-2.378	0.000186842
AGBL1-AS1	-0.141435	0.37687
AGBL2	0.657055	0.0212292
AGBL3	-0.164269	0.13903
AGBL4	0.592773	0.157122
AGBL4-AS1	0.111968	0.692559
AGBL4-IT1	0.454125	0.473123
AGBL5	0.184968	0.0129558
AGBL5-AS1	0.92967	0.130786
AGER	-1.422	7.07021e-05
AGFG1	-0.179747	0.232992
AGFG2	0.146784	0.203574
AGGF1	-0.0623396	0.551076
AGK	-0.301394	0.00223577
AGL	0.352425	0.114326
AGMAT	0.327258	0.00204916
AGMO	-0.27211	0.188692
AGO1	0.0181862	0.879572
AGO2	-0.150348	0.488319
AGO3	-0.13221	0.182765
AGO4	-0.501785	6.05176e-05
AGPAT1	-0.15562	0.256582
AGPAT2	0.186042	0.417804
AGPAT3	0.216491	0.0756281
AGPAT4	-0.00913791	0.956143
AGPAT5	0.27165	0.00375678
AGPS	0.0780152	0.595626
AGR2	0.739226	0.00127948
AGR3	0.726809	0.000174885
AGRN	0.301391	0.164755
AGRP	-0.935108	0.000113613
AGT	0.413426	0.0515277
AGTPBP1	-0.858708	0.000171567
AGTR1	-0.327485	0.0337452
AGTR2	-1.53677	4.85418e-05
AGTRAP	0.15115	0.225486
AGXT	-1.23771	0.0150355
AGXT2	0.0889747	0.815528
AHCTF1	-0.128794	0.397156
AHCY	0.288641	0.0618427
AHCYL1	-0.0827356	0.690329
AHCYL2	-0.114552	0.674203
AHDC1	0.0413678	0.798697
AHI1	0.171321	0.0673491
AHI1-DT	0.145706	0.570567
AHNAK	-0.508203	0.181796
AHNAK2	0.772265	3.36481e-05
AHR	-0.0903535	0.742521
AHRR	-0.231836	0.365224
AHSA1	0.19849	0.201613
AHSA2P	-0.126886	0.595626
AHSG	-0.20114	0.782115
AHSP	-0.866408	0.360065
AICDA	-0.132048	0.533366
AIDA	-0.108754	0.563565
AIF1	-0.00918135	0.972721
AIF1L	-0.174635	0.34208
AIFM1	0.0119788	0.945716
AIFM2	0.00620267	0.985299
AIFM3	-0.408924	0.556415
AIG1	0.264187	1.0607e-05
AIM2	0.646272	6.59885e-05
AIMP1	-0.0694062	0.504839
AIMP2	0.255976	0.0157405
AIP	0.184317	0.167274
AIPL1	2.43571	0.00038792
AIRE	0.82642	0.140158
AIRN	-1.02277	0.184618
AJAP1	-0.832725	6.24942e-05
AJM1	0.238643	0.00811264
AJUBA	-0.227839	0.0779072
AK1	-0.0819636	0.680027
AK2	0.125883	0.368253
AK3	0.0358004	0.811522
AK4	0.750765	0.000346964
AK5	-0.164139	0.768075
AK6	0.00596827	0.954967
AK7	0.330739	0.128261
AK8	0.433244	0.174157
AK9	-0.564224	0.131429
AKAIN1	-0.417026	0.544408
AKAP1	0.132631	0.437818
AKAP10	-0.0881715	0.324291
AKAP11	-0.427398	0.00137214
AKAP12	-1.02377	0.0356607
AKAP13	-0.204243	0.490989
AKAP14	1.23312	0.0577851
AKAP17A	0.143313	0.231905
AKAP3	-0.254747	0.842964
AKAP4	-0.33893	0.489468
AKAP5	-0.195922	0.0909313
AKAP6	-0.0073597	0.970359
AKAP7	0.0192391	0.849495
AKAP8	-0.119535	0.256905
AKAP8L	0.0398345	0.805515
AKAP9	-0.38953	0.00298631
AKIP1	0.163505	0.219936
AKIRIN1	-0.0463226	0.787883
AKIRIN2	-0.0677786	0.564994
AKNA	-1.33974	0.00691995
AKNAD1	-0.667901	0.0927739
AKR1A1	0.429663	0.00332209
AKR1B1	0.205416	0.246395
AKR1B10	2.1412	0.00510595
AKR1B15	0.0232682	0.85069
AKR1C1	0.310404	0.0856348
AKR1C2	-0.0685383	0.77719
AKR1C3	-0.484488	0.00906369
AKR1C4	-1.35155	0.0615933
AKR1C8	-1.16117	0.0422202
AKR1D1	1.81236	0.00554023
AKR1E2	-0.2316	0.817752
AKR7A2	0.254071	0.00691747
AKR7A3	0.267465	0.0404574
AKR7L	0.157979	0.17502
AKT1	0.0550724	0.814223
AKT1S1	0.406054	0.000579436
AKT2	-0.0658684	0.666264
AKT3	-0.380042	0.00485099
AKTIP	-0.0463431	0.609137
ALAD	-0.0798039	0.562333
ALAS1	-0.368255	0.0186786
ALAS2	-2.51066	0.00138378
ALB	-0.801845	0.300925
ALCAM	-0.156059	0.514591
ALDH16A1	0.279399	0.0173346
ALDH18A1	0.530784	1.23366e-05
ALDH1A1	-0.148278	0.580656
ALDH1A2	0.133744	0.654633
ALDH1A3	1.20394	1.33246e-08
ALDH1A3-AS1	0.555275	0.000151033
ALDH1B1	0.66871	9.74409e-06
ALDH1L1	0.518295	0.506594
ALDH1L1-AS1	-0.155732	0.872547
ALDH1L1-AS2	-0.524424	0.616757
ALDH1L2	-0.574201	0.100837
ALDH2	-0.453091	0.0415033
ALDH3A1	1.5872	0.00295821
ALDH3A2	-0.0212451	0.929686
ALDH3B1	0.0478977	0.847454
ALDH3B2	1.02796	0.255874
ALDH4A1	0.0926776	0.521521
ALDH5A1	0.0617021	0.660463
ALDH6A1	-0.332875	0.00583428
ALDH7A1	-0.112669	0.446783
ALDH8A1	-0.0301254	0.971569
ALDH9A1	-0.00167564	0.993989
ALDOA	0.255858	0.352608
ALDOB	-0.265624	0.275221
ALDOC	0.0794049	0.635861
ALG1	0.416061	2.69659e-05
ALG10	0.0152633	0.891666
ALG10B	-0.10795	0.291126
ALG11	-0.110139	0.259633
ALG12	-0.00499977	0.962094
ALG13	-0.843476	0.0121097
ALG14	0.121467	0.0320848
ALG14-AS1	-1.21923	0.0569815
ALG1L2	-0.260643	0.270875
ALG2	0.019364	0.905621
ALG3	0.416721	0.000235914
ALG5	0.229212	0.00438046
ALG6	0.0978454	0.543455
ALG8	-0.0739357	0.753129
ALG9	-0.0385947	0.577972
ALK	0.33073	0.65759
ALKAL1	1.35289	0.00152433
ALKAL2	-0.0743613	0.760151
ALKBH1	0.058755	0.402727
ALKBH2	0.332477	0.000149454
ALKBH3	0.00629737	0.959235
ALKBH3-AS1	-0.563053	0.278249
ALKBH4	0.267496	0.000747535
ALKBH5	-0.0626077	0.696681
ALKBH6	-0.144969	0.266533
ALKBH7	0.295741	0.000474094
ALKBH8	-0.00898584	0.92782
ALLC	-0.248047	0.704614
ALMS1	-1.5753	0.01982
ALMS1P1	-0.277843	0.108881
ALOX12	-0.478175	1.75508e-05
ALOX12-AS1	-0.0557819	0.646823
ALOX12B	-0.337243	0.667277
ALOX12P2	0.293549	0.379848
ALOX15	1.272	0.111549
ALOX15B	-0.117783	0.821502
ALOX5	-0.36865	0.154048
ALOX5AP	-0.29833	0.303758
ALOXE3	-0.278887	0.669908
ALPG	-1.29803	0.000674196
ALPI	-0.071767	0.855326
ALPK1	-2.1074	0.000141341
ALPK2	1.97479	1.43538e-05
ALPK3	-0.494811	0.00188173
ALPL	-0.26298	0.416552
ALPP	-1.01119	0.00292696
ALS2	-0.136831	0.0783378
ALS2CL	-0.105211	0.692064
ALX1	1.03943	0.162668
ALX3	0.438215	0.605082
ALX4	0.353082	0.505179
ALYREF	0.305409	0.00330122
AMACR	0.190366	0.623788
AMBN	0.126868	0.798697
AMBP	-0.0713191	0.878634
AMBRA1	-0.00726153	0.943258
AMD1	-0.266539	0.185696
AMDHD1	-0.40934	0.179824
AMDHD2	0.103979	0.317432
AMELX	-1.21716	0.0422067
AMELY	0.0312478	0.953867
AMER1	-0.133599	0.0452678
AMER2	-0.403053	0.0734579
AMER3	-0.491773	0.140317
AMFR	-0.117697	0.329633
AMH	-0.366565	0.190761
AMHR2	0.040884	0.96704
AMIGO1	-0.212874	0.0194968
AMIGO2	-0.365401	0.00492327
AMIGO3	-0.579142	0.364034
AMMECR1	-0.08002	0.21881
AMMECR1L	-0.0417639	0.727775
AMN	0.0210872	0.934972
AMN1	-0.0869227	0.232222
AMOT	-0.436043	0.242393
AMOTL1	-0.684984	0.00521434
AMOTL2	-0.515525	0.00074142
AMPD1	0.380844	0.737614
AMPD2	0.373838	0.00987932
AMPD3	0.34974	0.00762009
AMPH	0.132704	0.450326
AMT	2.69372	0.0060534
AMTN	0.784914	0.428481
AMY1A	0.32313	0.678789
AMY1B	0.372952	0.391936
AMY1C	0.452755	0.111293
AMY2A	-0.184366	0.864275
AMY2B	-0.125718	0.494506
AMZ1	0.17722	0.491012
AMZ2	0.0427279	0.922019
AMZ2P1	0.120164	0.106838
ANAPC1	-0.0199562	0.83883
ANAPC10	-0.0827791	0.345377
ANAPC11	0.276728	0.000251161
ANAPC13	0.127023	0.246268
ANAPC15	0.660624	0.139147
ANAPC16	-0.0396798	0.733387
ANAPC1P1	-0.605912	0.486141
ANAPC2	0.0520851	0.626295
ANAPC4	0.166716	0.0310892
ANAPC5	-0.164574	0.270014
ANAPC7	0.361004	0.000626673
ANG	-0.204101	0.0497825
ANGEL1	-0.0457152	0.719218
ANGEL2	-0.57681	0.0259262
ANGPT1	-0.7951	2.12061e-05
ANGPT2	0.343544	0.0716291
ANGPT4	-0.648845	0.00115052
ANGPTL1	-0.604629	0.0146972
ANGPTL2	0.133662	0.575093
ANGPTL3	-1.24639	0.050959
ANGPTL4	0.309561	0.467674
ANGPTL5	0.0936963	0.684977
ANGPTL6	0.285005	0.795105
ANGPTL7	-1.04087	0.000110071
ANGPTL8	-0.597446	0.483364
ANHX	0.127239	0.709484
ANK1	0.380766	0.000729166
ANK2	0.779768	1.27863e-06
ANK3	-0.217332	0.208943
ANKAR	-0.650648	0.0364607
ANKDD1A	0.0389552	0.76373
ANKDD1B	0.203968	0.179686
ANKEF1	0.157527	0.0620659
ANKFN1	0.692854	0.0179276
ANKFY1	-0.152972	0.295546
ANKH	0.224438	0.014996
ANKHD1	0.397959	0.00325414
ANKHD1-EIF4EBP3	-0.141494	0.31091
ANKIB1	-0.0973242	0.381627
ANKK1	0.428925	0.0160254
ANKLE1	-1.20996	0.00717228
ANKLE2	0.163451	0.23495
ANKMY1	0.0365419	0.912588
ANKMY2	-0.00479395	0.96357
ANKRA2	-0.114059	0.189751
ANKRD1	-1.44594	1.16692e-05
ANKRD10	0.25038	0.118989
ANKRD11	-0.138835	0.349724
ANKRD12	-0.131859	0.445871
ANKRD13A	-0.266352	0.0228808
ANKRD13B	0.223163	0.120756
ANKRD13C	-0.0714609	0.352305
ANKRD13D	0.547507	0.00091344
ANKRD16	0.0848908	0.291755
ANKRD17	-0.229404	0.0371475
ANKRD18A	0.150887	0.260269
ANKRD18B	2.08486	0.00131741
ANKRD18DP	0.531544	0.504853
ANKRD2	-0.558376	0.167161
ANKRD20A1	-1.37921	0.0421661
ANKRD20A11P	0.2124	0.675474
ANKRD20A2P	-2.15697	0.00507195
ANKRD20A4P	-0.477859	0.000646982
ANKRD22	0.658066	0.000346897
ANKRD23	0.192057	0.0491038
ANKRD24	0.478079	0.200796
ANKRD26	-0.557428	0.0510437
ANKRD26P3	-0.0895259	0.930753
ANKRD27	-0.234013	0.00289347
ANKRD28	0.264806	0.0769875
ANKRD29	-0.539608	0.00104021
ANKRD30A	-0.21432	0.801661
ANKRD30B	-0.997086	0.0686741
ANKRD30BL	-0.172401	0.869109
ANKRD31	-0.616984	0.486914
ANKRD33	-1.93137	0.00378946
ANKRD33B	-0.376337	0.00415278
ANKRD34A	0.151016	0.0871991
ANKRD34B	-0.851573	0.180863
ANKRD34C	-0.678707	0.000555521
ANKRD35	-0.5497	0.563565
ANKRD36	-0.28451	0.0239885
ANKRD36B	0.134613	0.876705
ANKRD36BP1	0.132973	0.595626
ANKRD36BP2	0.597173	0.0111661
ANKRD36C	-0.0770289	0.813006
ANKRD37	-0.0344789	0.88205
ANKRD39	0.0233982	0.846615
ANKRD40	-0.369746	0.00310759
ANKRD40CL	-0.919404	0.072773
ANKRD42	-0.0298131	0.928326
ANKRD44	-0.521665	0.000109454
ANKRD44-IT1	-0.195935	0.239827
ANKRD45	0.551935	0.00725651
ANKRD46	-0.33233	0.00039741
ANKRD49	0.248835	0.0048121
ANKRD50	-0.403026	0.00296562
ANKRD52	-0.0091956	0.95892
ANKRD53	0.544908	0.0054357
ANKRD54	0.394646	8.84755e-06
ANKRD55	0.27217	0.61947
ANKRD6	-0.317935	0.0234835
ANKRD60	0.243337	0.386866
ANKRD61	-0.177857	0.317585
ANKRD62	-2.26484	0.00090961
ANKRD63	-0.0347376	0.968256
ANKRD65	0.603112	7.22722e-07
ANKRD66	0.85051	0.0855548
ANKRD7	-0.422371	0.611399
ANKRD9	-0.123935	0.200438
ANKS1A	-0.540157	0.000783402
ANKS1B	2.78329	0.00081392
ANKS3	1.17171	0.18022
ANKS4B	-0.334878	0.0669293
ANKS6	0.0832772	0.49491
ANKUB1	1.11146	0.133561
ANKZF1	-0.0519024	0.794695
ANLN	-0.354198	0.549109
ANO1	-0.0677282	0.756001
ANO10	-0.0468661	0.709618
ANO2	-1.547	0.00219078
ANO3	-0.0950072	0.64464
ANO4	0.744116	0.431972
ANO5	-0.102256	0.43008
ANO6	-0.576873	0.0018643
ANO7	-0.455548	0.304449
ANO8	-0.137205	0.151825
ANO9	0.383538	0.0178563
ANOS1	-0.579485	0.00598071
ANP32A	0.0530311	0.746592
ANP32B	0.221871	0.153557
ANP32D	-1.07558	0.119733
ANP32E	-0.233347	0.0643236
ANPEP	0.290506	0.324492
ANTKMT	0.439683	0.000158269
ANTXR1	0.0536437	0.859448
ANTXR2	-0.124217	0.391548
ANTXRL	1.58815	0.0180125
ANXA1	-0.0775131	0.849321
ANXA10	1.09302	0.156672
ANXA11	0.18474	0.47141
ANXA13	1.60711	0.0358794
ANXA2	0.378309	0.274316
ANXA2R	0.238309	0.0258029
ANXA2R-AS1	-0.0306589	0.812864
ANXA2R-OT1	0.0408797	0.657899
ANXA3	-1.12281	2.58344e-07
ANXA4	0.172511	0.174693
ANXA5	-0.0665207	0.861846
ANXA6	-0.234142	0.315589
ANXA7	0.0383984	0.820969
ANXA8	0.412335	0.0751285
ANXA8L1	-0.0561196	0.893488
ANXA9	-0.183609	0.0275153
AOAH	-0.138825	0.608105
AOAH-IT1	-2.0172	0.000239315
AOC1	2.41431	0.000224987
AOC2	-0.471564	0.000330881
AOC3	-1.08603	0.000313244
AOC4P	-0.572142	0.00137572
AOPEP	0.19237	0.0401792
AOX1	-0.0783274	0.784043
AP1AR	-0.00859133	0.942315
AP1B1	0.233663	0.13155
AP1B1P1	-0.415472	0.599935
AP1G1	-0.0791845	0.639545
AP1G2	0.0342846	0.912939
AP1G2-AS1	-0.157337	0.322178
AP1M1	0.162622	0.178328
AP1M2	0.132465	0.389659
AP1S1	0.365485	1.86614e-05
AP1S2	-0.0753266	0.631574
AP1S3	-0.0972559	0.555671
AP2A1	0.127203	0.439469
AP2A2	0.0304479	0.845357
AP2B1	0.00724128	0.980803
AP2M1	-0.00399862	0.989066
AP2S1	0.30453	0.0159947
AP3B1	-0.144147	0.236536
AP3B2	0.489462	0.164508
AP3D1	-0.0261852	0.903191
AP3M1	0.0936395	0.325673
AP3M2	-0.116733	0.229881
AP3S1	0.215229	0.00550661
AP3S2	0.102215	0.300028
AP4B1	1.78769	0.00521778
AP4B1-AS1	-0.248648	0.0455309
AP4E1	-0.358411	0.0993977
AP4M1	0.15259	0.452839
AP4S1	-0.0362016	0.46904
AP5B1	-0.170674	0.251675
AP5M1	-0.0420044	0.652904
AP5S1	0.0881775	0.192309
AP5Z1	-0.0319535	0.819264
APAF1	-2.21767	2.53731e-05
APBA1	0.089335	0.268082
APBA2	0.201711	0.0362867
APBA3	0.192603	0.0110862
APBB1	-0.359142	0.0261179
APBB1IP	-0.0198837	0.933279
APBB2	-0.217174	0.137338
APBB3	-0.0859507	0.630651
APC	-0.305489	0.00627737
APC2	-0.356832	0.191556
APCDD1	0.165626	0.421243
APCDD1L	0.531983	0.195134
APCDD1L-DT	-0.19772	0.817289
APCS	0.0907353	0.791176
APEH	0.337637	0.00266706
APELA	0.350188	0.533797
APEX1	0.227856	0.0972241
APEX2	0.250284	0.000887734
APH1A	-0.0654381	0.71916
APH1B	-0.0598274	0.558957
API5	0.101668	0.474124
APIP	-0.195519	0.069479
APLF	0.0158689	0.824733
APLN	-0.540848	0.0913229
APLNR	0.805556	0.00331675
APLP1	-0.0360758	0.958925
APLP2	-0.179851	0.595626
APMAP	-0.103633	0.546366
APOA1	-0.391147	0.583846
APOA1-AS	-0.949158	0.000168075
APOA2	-1.2482	0.0961743
APOA4	-0.736756	0.19743
APOA5	-2.02277	0.00564713
APOB	-0.351567	0.134832
APOBEC1	0.676964	0.0520313
APOBEC2	-0.21656	0.223424
APOBEC3A	-0.233575	0.542121
APOBEC3B	1.22165	0.000775688
APOBEC3B-AS1	-0.625451	0.177077
APOBEC3C	0.470221	0.000647518
APOBEC3D	-1.54533	0.000833002
APOBEC3F	0.148024	0.0684542
APOBEC3G	0.306099	0.0243931
APOBEC3H	0.507148	0.112444
APOBEC4	0.790833	0.0985955
APOBR	-1.12814	0.0508325
APOC1	0.44043	0.147312
APOC1P1	1.53707	0.0487949
APOC2	0.403453	0.141585
APOC3	-0.213407	0.726868
APOC4	-0.352373	0.431409
APOD	0.277879	0.346857
APOE	1.01908	0.00128193
APOF	-0.346948	0.408518
APOH	-0.893606	0.0222773
APOL1	0.0755459	0.737199
APOL2	0.387377	0.0100464
APOL3	-0.00532072	0.982074
APOL4	0.0117957	0.987735
APOL5	-0.0207026	0.985257
APOL6	0.0448212	0.858536
APOLD1	-0.335692	0.579865
APOM	0.256661	0.00748326
APOO	0.302203	0.000211573
APOOL	-0.207257	0.00447113
APP	-0.34532	0.252139
APPBP2	-0.0996526	0.347751
APPL1	-0.158123	0.124865
APPL2	-0.00532204	0.97267
APRG1	-0.0513617	0.867834
APRT	0.333267	0.00715122
APTR	-0.0576405	0.559896
APTX	-1.62624	0.00216526
AQP1	-0.625892	0.0799381
AQP10	0.014532	0.965722
AQP11	0.0297324	0.797451
AQP12A	0.298608	0.440103
AQP12B	0.0483973	0.953867
AQP2	1.37079	0.0225424
AQP3	0.45499	0.150289
AQP4	-0.400773	0.178104
AQP5	1.12021	2.19589e-06
AQP5-AS1	1.17325	4.17142e-07
AQP6	1.27956	0.0563649
AQP7	0.131042	0.483484
AQP7B	-0.972633	0.146588
AQP8	0.104824	0.85878
AQP9	-0.400029	0.237778
AQR	-0.0573951	0.602637
AR	-0.609325	0.0548598
ARAF	0.0758053	0.628038
ARAP1	0.281758	0.127676
ARAP1-AS2	-0.417711	0.0462294
ARAP2	-0.440696	0.00331293
ARAP3	-0.746768	4.4117e-06
ARC	-0.991531	0.000127166
ARCN1	-0.231039	0.179556
AREG	0.0644652	0.898509
AREL1	-0.105931	0.400715
ARF1	0.0856029	0.81667
ARF3	0.0627081	0.819482
ARF4	0.156907	0.525524
ARF4-AS1	0.364967	0.624212
ARF5	0.321669	0.0338067
ARF6	0.147879	0.416296
ARFGAP1	1.14994	0.000404678
ARFGAP2	0.556874	0.0175785
ARFGAP3	0.195607	0.228132
ARFGEF1	-0.294092	0.0571757
ARFGEF2	-0.222261	0.0682898
ARFGEF3	-0.387135	0.0487688
ARFIP1	-0.0392448	0.744762
ARFIP2	0.178991	0.0551642
ARFRP1	0.759176	0.00223675
ARG1	-1.65446	1.27325e-05
ARG2	0.239169	0.362033
ARGFX	-0.0894807	0.931428
ARGLU1	-0.420129	0.038632
ARHGAP1	0.34292	0.0137199
ARHGAP10	-0.162074	0.188244
ARHGAP11A	0.28362	0.0232748
ARHGAP12	-2.3332	0.0015282
ARHGAP15	0.339755	0.00176811
ARHGAP17	-0.159176	0.345341
ARHGAP18	-0.344423	0.054591
ARHGAP19	-0.844218	0.00092764
ARHGAP20	-0.737359	0.0242114
ARHGAP21	-1.43556	0.00575264
ARHGAP22	0.478894	0.239713
ARHGAP23	-0.0382908	0.882877
ARHGAP24	-0.114978	0.207697
ARHGAP25	-0.851653	0.000216075
ARHGAP26	-0.157267	0.257765
ARHGAP26-AS1	-0.952542	0.175661
ARHGAP26-IT1	-1.22088	0.0714822
ARHGAP27	-0.455648	0.00041711
ARHGAP27P1-BPTFP1-KPNA2P3	-0.0565564	0.772861
ARHGAP28	-1.75075	0.000127224
ARHGAP29	-0.794902	1.62366e-05
ARHGAP29-AS1	-0.261581	0.764062
ARHGAP30	-1.00286	0.0245139
ARHGAP31	-0.683769	0.000294266
ARHGAP31-AS1	-0.374344	0.00421679
ARHGAP32	-0.193307	0.100278
ARHGAP33	-0.142245	0.31917
ARHGAP35	-0.1915	0.207184
ARHGAP36	0.425067	0.584262
ARHGAP39	0.529444	0.000542518
ARHGAP4	-0.0503964	0.793432
ARHGAP40	1.32565	0.0107325
ARHGAP42	-0.182964	0.0585546
ARHGAP42-AS1	0.00566593	0.988429
ARHGAP44	-0.447721	0.000506252
ARHGAP44-AS1	-0.227829	0.519616
ARHGAP45	-0.237891	0.31507
ARHGAP5	-0.527113	0.000651489
ARHGAP6	-0.665265	2.8142e-06
ARHGAP8	-0.10479	0.71442
ARHGAP9	-0.070489	0.717535
ARHGDIA	0.257601	0.392325
ARHGDIB	0.230752	0.404283
ARHGDIG	0.662691	0.248192
ARHGEF1	-0.425848	0.023669
ARHGEF10	-0.861173	1.64469e-06
ARHGEF10L	0.0673148	0.746264
ARHGEF11	-0.224894	0.0856348
ARHGEF12	-0.562728	0.0049895
ARHGEF15	-0.242865	0.278984
ARHGEF16	0.041309	0.792814
ARHGEF17	-0.243022	0.199537
ARHGEF18	-0.103124	0.347043
ARHGEF19	0.130531	0.346686
ARHGEF2	-0.499094	0.0193963
ARHGEF2-AS1	-0.611922	0.00905014
ARHGEF2-AS2	0.0106387	0.959451
ARHGEF25	-0.0222595	0.899917
ARHGEF26	-0.650113	1.97136e-05
ARHGEF26-AS1	-0.516859	8.50915e-06
ARHGEF28	-0.353711	0.00798322
ARHGEF3	-0.266445	0.0888122
ARHGEF3-AS1	0.146326	0.813457
ARHGEF33	0.466695	0.663984
ARHGEF35	-0.0977712	0.739254
ARHGEF37	-0.34561	0.0156181
ARHGEF38	-0.217363	0.237814
ARHGEF38-IT1	-0.929542	0.088087
ARHGEF39	-0.082482	0.571996
ARHGEF4	-0.657142	0.0112734
ARHGEF40	-0.153018	0.197286
ARHGEF5	-0.373669	0.0240702
ARHGEF6	-0.393585	0.00413665
ARHGEF7	0.0846255	0.595626
ARHGEF7-AS2	-0.419167	0.521749
ARHGEF9	-0.249349	0.624404
ARHGEF9-IT1	-0.515446	0.537129
ARID1A	-0.0276642	0.86579
ARID1B	-0.821064	0.0199545
ARID2	-0.37523	0.00853362
ARID3A	-0.195633	0.0892993
ARID3B	-0.260492	0.0431668
ARID3C	-0.320379	0.595626
ARID4A	-0.43839	5.90256e-05
ARID4B	-0.0764497	0.55599
ARID5A	0.0535579	0.867045
ARID5B	0.279987	0.16515
ARIH1	-0.0668719	0.602066
ARIH2	0.0890448	0.540129
ARL1	0.184757	0.0756256
ARL10	0.055027	0.644343
ARL11	-0.173045	0.240114
ARL13A	-1.30725	0.0303306
ARL13B	-0.337598	0.00610958
ARL14	1.15361	0.0274908
ARL14EP	0.162776	0.0249471
ARL14EPL	-0.111521	0.891076
ARL15	0.00930812	0.937212
ARL16	0.0999282	0.55461
ARL17A	-0.172279	0.16199
ARL17B	0.0367241	0.811467
ARL2	0.121915	0.417121
ARL2BP	-0.0423199	0.781671
ARL3	0.128432	0.112527
ARL4A	0.0651777	0.647402
ARL4C	0.209413	0.21448
ARL4D	0.186515	0.393089
ARL5A	-0.112655	0.337556
ARL5B	-0.308051	0.0870838
ARL5C	0.17955	0.871091
ARL6	-0.312514	0.000468626
ARL6IP1	0.0388873	0.866865
ARL6IP4	0.0864354	0.362762
ARL6IP5	0.11798	0.627202
ARL6IP6	-0.233575	0.000247466
ARL8A	0.0215584	0.905455
ARL8B	-0.0717415	0.719043
ARL9	0.586259	3.26837e-06
ARLNC1	-0.66099	0.0318614
ARMC1	-0.116275	0.26143
ARMC10	0.0604125	0.598804
ARMC12	0.22366	0.511572
ARMC2	0.226871	0.0801082
ARMC3	1.40811	0.0910524
ARMC5	0.630717	1.57848e-05
ARMC6	0.173986	0.0752266
ARMC7	0.17013	0.0234057
ARMC8	-0.0859828	0.506543
ARMC9	-0.0472277	0.71671
ARMCX1	-0.168733	0.0586743
ARMCX2	0.121016	0.273952
ARMCX3	-0.00829955	0.960864
ARMCX4	-0.183473	0.034189
ARMCX5	0.0186404	0.953295
ARMCX6	0.0101748	0.935528
ARMH1	0.300361	0.0686154
ARMH2	0.907113	0.0379283
ARMH3	-0.348609	0.000824442
ARMH4	0.389982	0.000406656
ARMS2	0.317511	0.649339
ARMT1	-0.106009	0.528989
ARNT	-0.213545	0.0521267
ARNT2	0.0792184	0.645775
ARNTL	-0.578324	0.0428865
ARNTL2	0.853505	9.75649e-08
ARNTL2-AS1	0.184032	0.842938
ARPC1A	0.00386339	0.983182
ARPC1B	0.221489	0.360065
ARPC2	0.0815865	0.806145
ARPC3	0.0964694	0.712088
ARPC4	0.478002	0.0169565
ARPC4-TTLL3	-0.482297	1.03196e-05
ARPC5	0.16724	0.426216
ARPC5L	0.389239	0.00383111
ARPIN	-0.101541	0.431971
ARPIN-AP3S2	0.051454	0.660073
ARPP19	-0.403371	0.0123884
ARPP21	-0.508631	0.37557
ARR3	-1.37191	0.132338
ARRB1	-0.626838	2.36384e-05
ARRB2	0.102716	0.650111
ARRDC1	0.165828	0.198861
ARRDC1-AS1	0.101615	0.141186
ARRDC2	-0.243809	0.407072
ARRDC3	-0.296237	0.205953
ARRDC3-AS1	-0.132026	0.240452
ARRDC4	-0.221855	0.149956
ARRDC5	0.0701544	0.66661
ARSA	0.123984	0.403417
ARSB	-0.00153888	0.993678
ARSD	0.0634523	0.700017
ARSD-AS1	-0.893054	0.349203
ARSF	-1.04355	0.051095
ARSG	0.0655854	0.248308
ARSH	0.966275	0.184228
ARSI	0.126312	0.437488
ARSJ	-0.0512126	0.7286
ARSK	-0.225994	0.00109791
ARSL	0.326861	0.499382
ART1	-1.15792	0.0146482
ART3	-0.123977	0.850702
ART4	-0.46471	0.00245551
ART5	-0.616688	0.493239
ARTN	1.68443	0.00321671
ARV1	-0.00404158	0.978064
ARVCF	0.0168262	0.92576
ARX	0.755603	0.0285513
AS3MT	0.041254	0.723612
ASAH1	0.16279	0.911367
ASAH1-AS1	-0.806606	0.109126
ASAH2	-0.0650057	0.462247
ASAH2B	-0.0407208	0.566455
ASAP1	-0.0362725	0.84177
ASAP1-IT2	0.124493	0.492735
ASAP2	-0.446558	0.00834396
ASAP3	-0.267371	0.0133462
ASB1	-0.0212668	0.842061
ASB10	0.266222	0.539211
ASB11	-0.855498	0.172128
ASB12	0.186276	0.172384
ASB13	0.0170481	0.901154
ASB14	-0.193926	0.737182
ASB15	-0.931006	0.192688
ASB15-AS1	-0.400906	0.473065
ASB16	-0.210544	0.108042
ASB16-AS1	-0.0448859	0.643537
ASB17	-0.0559372	0.908247
ASB18	-0.160655	0.261506
ASB2	0.818245	7.36728e-07
ASB3	0.0316801	0.699216
ASB4	-0.239498	0.0127831
ASB5	1.09948	0.0199219
ASB6	0.240302	0.00111271
ASB7	0.0209166	0.723239
ASB8	-0.034962	0.730829
ASB9	-0.219975	0.0397223
ASCC1	0.0134393	0.876267
ASCC2	0.691325	3.23849e-05
ASCC3	0.102608	0.375507
ASCL1	0.122099	0.839694
ASCL2	0.423235	0.00363158
ASCL3	-0.196858	0.821408
ASCL4	0.672415	0.391149
ASCL5	0.0822268	0.922941
ASF1A	-0.0778874	0.468849
ASF1B	0.500202	0.000253534
ASGR1	0.0136842	0.957429
ASGR2	-0.639472	0.214557
ASH1L	-0.802787	0.00113321
ASH1L-AS1	0.140572	0.161632
ASH2L	-0.309623	0.00523746
ASIC1	0.739169	0.00284743
ASIC2	0.202414	0.848831
ASIC3	0.437191	0.497687
ASIC4	-0.204085	0.827535
ASIC5	-0.248061	0.730361
ASIP	0.486461	0.312048
ASL	0.073774	0.61465
ASMT	-0.404818	0.556673
ASMTL	0.105843	0.158267
ASNS	-0.424107	0.152303
ASNSD1	-0.00635345	0.967129
ASNSP1	-0.590229	0.457816
ASPA	-0.112869	0.365376
ASPDH	-0.0602076	0.868501
ASPG	-1.05972	1.80986e-05
ASPH	-0.0567013	0.777776
ASPHD1	1.61405	0.000133645
ASPHD2	0.487606	1.41902e-06
ASPM	0.341631	0.0985989
ASPN	0.833815	4.49091e-05
ASPRV1	-0.104193	0.235795
ASPSCR1	0.0935597	0.343955
ASRGL1	-0.344605	0.0354105
ASS1	0.423841	0.00811038
ASTE1	0.170718	0.103683
ASTL	-0.10969	0.854452
ASTN1	0.609257	0.196697
ASTN2	0.655223	0.344045
ASTN2-AS1	-0.0521928	0.958821
ASXL1	-0.0614414	0.772701
ASXL2	-0.279235	0.0962832
ASXL3	-0.0456945	0.787076
ASZ1	-0.959316	0.28582
ATAD1	-0.0871852	0.394365
ATAD2	-0.0836477	0.525588
ATAD2B	-0.204237	0.103828
ATAD3A	0.63345	0.00791112
ATAD3B	0.377003	0.0124682
ATAD3C	0.291498	0.00359011
ATAD5	-0.12479	0.0580257
ATAT1	0.0560508	0.767255
ATCAY	0.0702114	0.626321
ATE1	-0.345215	0.0278071
ATE1-AS1	-0.0170056	0.971569
ATF1	-0.112796	0.172569
ATF2	-0.348803	0.140158
ATF3	-0.71494	0.0226605
ATF4	0.0206656	0.960101
ATF5	0.463149	8.63223e-06
ATF6	-0.121738	0.437843
ATF6B	0.077237	0.652612
ATF7	-0.267646	0.0238232
ATF7-NPFF	-0.00329463	0.987434
ATF7IP	-0.0784124	0.595626
ATF7IP2	0.0868736	0.816402
ATG10	-0.00447807	0.970889
ATG101	0.144478	0.279228
ATG12	0.0707514	0.342553
ATG13	0.160241	0.132226
ATG14	-0.196849	0.179702
ATG16L1	0.159216	0.133361
ATG16L2	-0.562098	0.00124019
ATG2A	-0.0904133	0.456209
ATG2B	-0.244234	0.0225176
ATG3	0.0429592	0.758019
ATG4A	0.0385395	0.719417
ATG4B	0.111305	0.556609
ATG4C	0.00801454	0.977904
ATG4D	0.400067	8.28957e-05
ATG5	-0.0665712	0.631188
ATG7	0.283179	0.00540991
ATG9A	0.0654773	0.6852
ATG9B	1.02335	0.308465
ATIC	0.126626	0.551042
ATL1	-0.114349	0.22945
ATL2	0.0344723	0.79538
ATL3	0.00193584	0.993072
ATM	-0.192474	0.212682
ATMIN	-0.0765452	0.637957
ATN1	-0.504176	0.00528887
ATOH1	0.0217669	0.954903
ATOH7	0.121014	0.873816
ATOH8	-0.551016	0.000805115
ATOX1	0.438197	2.96508e-05
ATP10A	-0.25764	0.100666
ATP10B	1.27738	0.00127241
ATP10D	-0.310609	0.0140233
ATP11A	-0.506467	0.025828
ATP11A-AS1	-0.417108	0.123585
ATP11AUN	-0.739095	0.26033
ATP11B	-0.244756	0.0689628
ATP11C	-1.79843	0.0267286
ATP12A	2.03405	0.00440622
ATP13A1	0.545786	7.79072e-05
ATP13A2	-0.0175609	0.911511
ATP13A3	-0.198606	0.469676
ATP13A4	-0.690911	0.000467769
ATP13A5	-0.385233	0.158277
ATP1A1	-0.327615	0.355749
ATP1A1-AS1	-0.306583	0.0266754
ATP1A2	0.0338881	0.910582
ATP1A3	-0.0586774	0.941402
ATP1A4	1.20458	0.0600824
ATP1B1	0.486821	0.0130921
ATP1B2	0.407078	0.0133021
ATP1B3	0.177913	0.51038
ATP1B4	-1.01269	0.0518398
ATP23	0.0499351	0.677688
ATP2A1	0.104472	0.78996
ATP2A1-AS1	0.513095	0.363141
ATP2A2	0.211018	0.5438
ATP2A3	0.421346	0.00346939
ATP2B1	0.110301	0.41411
ATP2B2	0.525313	0.549391
ATP2B3	0.372049	0.671385
ATP2B4	-0.568746	0.00774584
ATP2C1	-0.375664	0.0827812
ATP2C2	-0.913828	0.0107443
ATP2C2-AS1	-0.325494	0.0224871
ATP4A	-0.0259803	0.977669
ATP4B	0.0781676	0.897876
ATP5F1A	0.242726	0.342445
ATP5F1B	0.0424913	0.904317
ATP5F1C	-0.108865	0.613228
ATP5F1D	0.370832	0.000460746
ATP5F1E	0.556049	0.00671793
ATP5IF1	0.355225	3.74404e-05
ATP5MC1	0.342999	0.000784386
ATP5MC2	0.490263	0.00740812
ATP5MC3	0.275707	0.0304195
ATP5ME	0.349304	0.00124643
ATP5MF	0.128299	0.174592
ATP5MF-PTCD1	-0.145079	0.651767
ATP5MG	0.211424	0.133023
ATP5MGL	-0.845202	0.0516114
ATP5MJ	0.349453	0.000272351
ATP5MK	0.184228	0.0473433
ATP5PB	0.207888	0.0498898
ATP5PD	0.234673	0.0489802
ATP5PF	0.207722	0.0138044
ATP5PO	0.222284	0.111125
ATP6AP1	0.218867	0.339086
ATP6AP1-DT	0.413337	1.24786e-05
ATP6AP2	0.052471	0.844485
ATP6V0A1	0.630713	0.00416886
ATP6V0A2	0.0846504	0.313181
ATP6V0A4	1.99179	0.0210375
ATP6V0B	0.567655	0.00225014
ATP6V0C	0.348377	0.0551959
ATP6V0D1	0.347843	0.105223
ATP6V0D1-DT	-0.18234	0.285977
ATP6V0D2	0.589521	0.0239238
ATP6V0E1	0.501747	0.000939001
ATP6V0E2	0.288982	0.0016473
ATP6V0E2-AS1	-0.382723	0.452509
ATP6V1A	-0.0452761	0.822885
ATP6V1B1	-0.0536638	0.929554
ATP6V1B2	0.00808369	0.980163
ATP6V1C1	-0.0919329	0.4638
ATP6V1C2	0.197426	0.134803
ATP6V1D	0.204952	0.0334414
ATP6V1E1	-0.0241926	0.915781
ATP6V1E2	-0.163428	0.0562749
ATP6V1F	0.327561	0.0551959
ATP6V1FNB	0.28602	0.00542713
ATP6V1G1	0.0702234	0.677169
ATP6V1G2	-0.333413	0.399068
ATP6V1G3	0.626423	0.151993
ATP6V1H	-0.00520268	0.983106
ATP7A	-0.313514	0.00389848
ATP7B	-2.50843	0.00354349
ATP8A1	-0.733771	0.000182638
ATP8A2	-0.495306	0.00491742
ATP8B1	-0.00266834	0.989725
ATP8B1-AS1	0.0411029	0.598139
ATP8B2	0.0934097	0.561874
ATP8B3	0.121712	0.607895
ATP8B4	0.389743	0.00051974
ATP8B5P	-0.507878	0.0162222
ATP9A	0.22621	0.0439062
ATP9B	-0.0544694	0.600945
ATPAF1	0.144398	0.131732
ATPAF2	0.113331	0.128678
ATPSCKMT	0.196133	0.00203774
ATR	0.040626	0.698152
ATRAID	0.203302	0.080348
ATRIP	0.524197	0.613859
ATRN	-0.125161	0.282263
ATRNL1	0.806462	0.07123
ATRX	-0.43426	0.0610369
ATXN1	-0.280378	0.125741
ATXN10	0.12963	0.274396
ATXN1L	-0.343567	0.00496128
ATXN2	-0.0599882	0.757705
ATXN2-AS	-0.0503317	0.845935
ATXN2L	-0.437834	0.207114
ATXN3	-0.255763	0.0588989
ATXN3L	-0.152119	0.71553
ATXN7	-0.450002	0.00591122
ATXN7L1	-0.136871	0.073944
ATXN7L2	-0.0580023	0.718176
ATXN7L3	0.342268	0.00811139
ATXN7L3B	0.00521638	0.979198
AUH	-0.0976279	0.0914295
AUNIP	-0.0579925	0.760513
AUP1	0.175686	0.389094
AURKA	0.451022	0.63245
AURKAIP1	0.443165	0.000600324
AURKB	0.360965	0.679784
AURKC	0.630732	0.0950417
AUTS2	0.330724	0.00492851
AVEN	0.278771	0.000133872
AVIL	-0.0429232	0.888093
AVL9	-0.231759	0.0425244
AVP	0.855846	0.0329349
AVPI1	-0.176442	0.279713
AVPR1A	0.764227	0.000115466
AVPR1B	0.584021	0.478638
AVPR2	-0.278577	0.516799
AWAT1	-0.788446	0.272289
AWAT2	-1.34359	0.066347
AXDND1	0.774207	0.362762
AXIN1	0.151072	0.112983
AXIN2	-0.121904	0.458668
AXL	0.171364	0.365403
AZGP1	-0.37498	0.413738
AZGP1P1	-1.23778	0.0684142
AZI2	-0.167393	0.13046
AZIN1	0.186119	0.202884
AZIN2	0.232946	0.61575
AZU1	-0.335672	0.269726
B2M	-0.0269083	0.960945
B3GALNT1	-0.912205	9.00031e-05
B3GALNT2	-0.0294419	0.819666
B3GALT1	-0.173684	0.1817
B3GALT2	-0.40922	0.0240218
B3GALT4	0.123674	0.0893698
B3GALT5	0.484134	0.0251003
B3GALT6	0.359345	0.00038727
B3GALT9	-0.0481352	0.756034
B3GAT1	0.297381	0.71998
B3GAT2	-0.197405	0.488965
B3GAT3	0.461238	9.8853e-05
B3GLCT	-0.0199111	0.816402
B3GNT2	-1.81117	0.000106665
B3GNT3	1.57653	3.04378e-11
B3GNT4	0.274396	0.184608
B3GNT5	-0.323498	0.0950399
B3GNT6	0.698027	0.261997
B3GNT7	-0.255573	0.113624
B3GNT8	-0.211301	0.236141
B3GNT9	0.241656	0.0176746
B3GNTL1	-0.00316845	0.986363
B4GALNT1	0.123227	0.460895
B4GALNT2	-0.239942	0.0653664
B4GALNT3	0.794139	0.0100505
B4GALNT4	0.824335	1.79362e-05
B4GALT1	0.159139	0.57382
B4GALT2	0.463077	0.000415603
B4GALT3	0.148778	0.127294
B4GALT4	0.0414344	0.837605
B4GALT4-AS1	-1.01611	0.146726
B4GALT5	0.0566987	0.857789
B4GALT6	-0.0175387	0.897348
B4GALT7	0.398547	1.5334e-06
B4GAT1	-0.214372	0.0739132
B4GAT1-DT	-0.348133	0.0178737
B9D1	0.529112	9.57985e-05
B9D2	0.315896	1.53287e-05
BAALC	-0.486108	0.00341366
BAALC-AS1	-0.177216	0.289046
BAAT	2.11337	3.05545e-12
BABAM1	0.185063	0.0622172
BABAM2	0.270402	0.00244374
BACE1	-0.0422637	0.768376
BACE2	0.856382	3.0835e-09
BACH1	-0.289216	0.0714822
BACH1-IT3	-0.426401	0.595626
BACH2	-0.418234	0.415175
BAD	0.253378	0.0114878
BAG1	0.294859	0.00715294
BAG2	0.133031	0.271319
BAG3	0.0640465	0.868586
BAG4	0.0470655	0.591581
BAG5	-0.025676	0.854651
BAG6	-0.226644	0.11477
BAHCC1	-0.0449028	0.760301
BAHD1	0.0852175	0.554413
BAIAP2	0.114421	0.503563
BAIAP2-DT	-0.200931	0.117879
BAIAP2L1	0.292574	0.0391897
BAIAP2L2	0.104343	0.883609
BAIAP3	0.3441	0.260068
BAK1	0.333218	0.00250854
BAMBI	-0.120262	0.458279
BANF1	0.285934	0.00455471
BANF2	0.456937	0.276918
BANK1	-0.0759717	0.868877
BANP	-0.716194	0.080799
BAP1	0.540328	0.000804282
BARD1	-1.35272	0.00384839
BARHL1	0.40495	0.555862
BARHL2	0.292606	0.309694
BARX1	0.554426	0.540015
BARX1-DT	-0.152255	0.787821
BARX2	0.822295	9.19753e-05
BASP1	0.253327	0.260556
BATF	0.764317	5.96688e-06
BATF2	-0.0783461	0.73371
BATF3	0.458525	0.00405073
BAX	0.427152	0.000552381
BAZ1A	0.206442	0.244555
BAZ1A-AS1	-0.0552718	0.587035
BAZ1B	0.0722429	0.564825
BAZ2A	-0.459825	0.0091313
BAZ2B	-0.385062	0.0174249
BBC3	0.0570249	0.781389
BBIP1	-0.330363	0.00301509
BBLN	0.643904	4.90016e-06
BBOF1	0.363478	0.0159653
BBOX1	-0.0786471	0.951808
BBOX1-AS1	-0.0290561	0.931947
BBS1	-0.0440384	0.702961
BBS10	-0.204006	0.0563642
BBS12	0.140895	0.0715292
BBS2	0.0428515	0.756887
BBS4	0.0204618	0.852516
BBS5	0.0947878	0.694983
BBS7	-0.134273	0.0364087
BBS9	-0.322149	0.186888
BBX	-0.225891	0.0597763
BCAM	0.230071	0.381261
BCAN	-0.0119387	0.984132
BCAP29	-0.1326	0.145514
BCAP31	0.43204	0.0229
BCAR1	0.148214	0.508847
BCAR3	-0.610882	0.00111252
BCAR4	-0.312008	0.594679
BCAS1	0.672455	0.146496
BCAS2	0.113262	0.17855
BCAS3	0.185164	0.145842
BCAS4	0.226297	0.00635926
BCAT1	0.189662	0.433997
BCAT2	-0.16653	0.271724
BCCIP	0.248732	0.00353796
BCDIN3D	0.059424	0.398783
BCDIN3D-AS1	0.00080305	0.9961
BCHE	0.267155	0.197664
BCKDHA	-0.146818	0.204894
BCKDHB	-0.18559	0.00566246
BCKDK	0.389962	0.000194905
BCL10	0.016628	0.890669
BCL11A	0.399652	0.000782709
BCL11B	0.438807	0.320404
BCL2	0.112368	0.303332
BCL2A1	-0.098746	0.740168
BCL2L1	-0.242632	0.394101
BCL2L10	2.00644	0.0017182
BCL2L11	-0.188539	0.507222
BCL2L12	0.338584	3.05559e-05
BCL2L13	-0.703451	0.00203026
BCL2L14	0.247906	0.782477
BCL2L15	0.347451	0.000594092
BCL2L2	-0.391996	0.0100381
BCL2L2-PABPN1	-1.25488	0.184223
BCL3	0.25938	0.432942
BCL6	-0.213252	0.391915
BCL6B	-0.486481	0.0180707
BCL7A	0.178503	0.0110257
BCL7B	0.0485178	0.715627
BCL7C	0.326089	0.00204916
BCL9	0.0145143	0.915781
BCL9L	-0.189696	0.256905
BCLAF1	-0.492678	0.0144293
BCLAF3	-0.287958	0.000181277
BCO1	0.456991	0.440756
BCO2	0.127606	0.459671
BCOR	-0.672907	0.0273006
BCORL1	0.00194039	0.988789
BCORP1	-0.570978	0.243632
BCR	-0.118047	0.486472
BCS1L	-0.115655	0.700136
BCYRN1	0.378346	0.00183955
BDH1	0.46947	0.000900192
BDH2	0.121161	0.322643
BDKRB1	1.39563	0.0631365
BDKRB2	0.92551	9.01381e-05
BDNF	-1.25683	0.000426178
BDNF-AS	-0.300962	0.223391
BDP1	-0.396996	0.0241067
BEAN1	0.795378	4.05717e-08
BEAN1-AS1	-0.475163	0.168047
BECN1	0.0977759	0.334652
BECN2	-0.711924	0.172887
BEGAIN	0.682206	0.16851
BEND2	-0.986411	0.00333728
BEND3	0.105247	0.190819
BEND4	-1.46084	0.138715
BEND5	0.058645	0.683915
BEND6	0.668183	1.58488e-05
BEND7	-0.413292	4.26817e-06
BEST1	-0.222667	0.104262
BEST2	-0.149344	0.469107
BEST3	-0.5068	0.0161207
BEST4	0.690124	0.000792511
BET1	0.0804278	0.345116
BET1L	0.0855222	0.533299
BEX1	-0.601711	3.41943e-05
BEX2	0.048418	0.747396
BEX3	0.00150314	0.993025
BEX4	0.0374369	0.780139
BEX5	-0.418927	0.00664368
BFAR	-0.123015	0.315247
BFSP1	-0.688075	0.229955
BFSP2	2.38885	0.000671707
BFSP2-AS1	-0.0771902	0.823176
BGLAP	0.22418	0.209347
BGLT3	-0.0870813	0.838954
BGN	0.347811	0.303456
BHLHA15	0.316563	0.416075
BHLHA9	0.238807	0.616695
BHLHB9	-0.585543	0.0618595
BHLHE22	0.689716	3.57789e-05
BHLHE22-AS1	-0.084777	0.948405
BHLHE23	0.185093	0.620532
BHLHE40	-0.113995	0.757527
BHLHE40-AS1	0.394386	0.125237
BHLHE41	0.0589097	0.776506
BHMT	0.295102	0.668547
BHMT2	-0.000722142	0.997996
BICC1	0.215198	0.105593
BICD1	-0.211999	0.0384027
BICD2	-0.0564052	0.667102
BICDL1	0.610807	2.54874e-06
BICDL2	0.113971	0.730786
BICRA	0.010294	0.949933
BICRAL	-0.226493	0.111053
BID	-0.0691907	0.893347
BIK	0.755006	5.33499e-09
BIN1	0.0912378	0.447672
BIN2	-0.353199	0.0880876
BIN3	2.54501	0.00219704
BIRC2	-0.344035	0.0113145
BIRC3	-0.0723136	0.835713
BIRC5	0.900644	0.0208295
BIRC6	-0.378452	0.0268865
BIRC6-AS2	-0.204739	0.173887
BIRC7	0.176828	0.823943
BIRC8	0.107368	0.711345
BISPR	0.100861	0.259679
BIVM	0.0750891	0.372279
BIVM-ERCC5	-0.231541	0.0209308
BLACAT1	0.736537	4.73526e-06
BLACE	-0.0424508	0.917648
BLCAP	0.203585	0.0951645
BLID	-0.33329	0.691557
BLK	1.07495	0.0152294
BLM	-0.191656	0.494074
BLMH	0.235023	0.00687364
BLNK	0.313284	0.245547
BLOC1S1	0.196209	0.102894
BLOC1S2	0.139321	0.225797
BLOC1S3	0.209017	0.0106603
BLOC1S4	0.322202	1.067e-07
BLOC1S5	0.0504507	0.507222
BLOC1S6	0.0732614	0.602261
BLVRA	0.0529556	0.72529
BLVRB	-0.0663177	0.768661
BLZF1	-0.0997262	0.244724
BMERB1	0.287466	0.0118695
BMF	0.534971	0.00117395
BMI1	0.0314935	0.820977
BMP1	0.522619	0.0045336
BMP10	-0.4129	0.574967
BMP15	1.26682	0.0844246
BMP2	-0.694837	0.00149058
BMP2K	0.0804111	0.542176
BMP3	-0.146079	0.504772
BMP4	0.0193578	0.9811
BMP5	-0.426524	0.0229364
BMP6	-0.241695	0.246879
BMP7	0.65717	5.34362e-05
BMP8A	0.286356	0.0200835
BMP8B	0.0781773	0.436751
BMPER	-0.382464	0.0118695
BMPR1A	-0.578712	0.015188
BMPR1B	-0.199346	0.789599
BMPR2	-0.671422	0.00633368
BMS1	0.114219	0.329495
BMS1P1	-0.130349	0.303704
BMS1P4-AGAP5	-1.03543	0.0115896
BMT2	0.00758747	0.948986
BMX	-0.800438	0.0297322
BNC1	1.66755	7.8123e-05
BNC2	0.278585	0.0165907
BNC2-AS1	0.222288	0.0782019
BNIP1	0.116662	0.0468496
BNIP2	-0.262061	0.0431133
BNIP3	-0.194343	0.0918497
BNIP3L	-0.133116	0.568642
BNIP5	2.92642	1.07255e-05
BNIPL	-0.0926381	0.668307
BOC	0.751203	4.29497e-06
BOD1	0.108477	0.217459
BOD1L1	-0.335145	0.00721581
BOD1L2	0.185543	0.611818
BOK	0.023316	0.926562
BOLA1	0.117466	0.19606
BOLA2	0.324307	0.000431861
BOLA2-SMG1P6	0.407559	4.9407e-05
BOLA2B	0.324307	0.000431861
BOLA3	0.230024	0.00136841
BOLA3-DT	-0.189375	0.0194872
BOLL	0.0502497	0.960101
BOP1	0.459535	0.00411838
BORA	0.186411	0.0264207
BORCS5	0.0744754	0.168674
BORCS6	0.263661	0.00656296
BORCS7	0.00156023	0.991347
BORCS8	-0.193429	0.110367
BPESC1	0.00802606	0.993694
BPGM	0.0297325	0.793783
BPHL	-0.154201	0.259715
BPI	-0.218846	0.713066
BPIFA1	1.696	0.0437115
BPIFA2	0.37313	0.545874
BPIFA3	-0.144365	0.83144
BPIFA4P	-0.0910063	0.73042
BPIFB1	1.63415	0.000106184
BPIFB2	1.79612	0.0125726
BPIFB3	-0.103118	0.824132
BPIFB4	1.21795	0.0624409
BPIFB6	0.323148	0.427177
BPIFC	-0.0786548	0.931626
BPNT1	-0.145268	0.572339
BPNT2	-0.0921556	0.620514
BPTF	-0.275739	0.00889539
BPY2	-0.0191971	0.961396
BPY2B	-0.0191971	0.961396
BPY2C	-0.0191971	0.961396
BRAF	-0.291748	0.00559801
BRAP	0.0140987	0.852596
BRAT1	0.260671	0.00839194
BRCA1	-0.292519	0.0247344
BRCA2	0.0380684	0.755424
BRCC3	-0.0371317	0.898046
BRD1	-0.20739	0.0291066
BRD2	-0.263704	0.0505174
BRD3	-0.0916402	0.372881
BRD3OS	0.286721	0.000184145
BRD4	0.0557515	0.758734
BRD7	-0.0188316	0.890742
BRD8	-0.543235	0.0197647
BRD9	-0.229415	0.135251
BRDT	0.613833	0.491848
BRF1	1.20435	0.0298523
BRF2	0.23171	0.00587738
BRI3	-0.0665717	0.749282
BRI3BP	0.155286	0.0652526
BRI3BPP1	-0.537112	0.502296
BRICD5	-0.126673	0.397712
BRINP1	-0.973702	0.00282458
BRINP2	0.455728	0.619713
BRINP3	0.620632	0.000136221
BRIP1	0.183081	0.141352
BRIX1	0.187347	0.0397098
BRK1	0.246926	0.169349
BRME1	-0.102309	0.909781
BRMS1	0.347345	0.000704255
BRMS1L	-0.00341418	0.970417
BROX	-1.11703	0.00166145
BRPF1	0.161099	0.0888613
BRPF3	-0.345485	0.0102248
BRS3	0.625258	0.452211
BRSK1	0.865305	0.0263435
BRSK2	-0.109827	0.893415
BRWD1	-0.151074	0.198609
BRWD1-AS1	-0.111101	0.912585
BRWD1-AS2	0.159768	0.449745
BRWD3	-0.328772	0.00242605
BSCL2	0.441047	3.78223e-05
BSDC1	-0.0716918	0.612906
BSG	0.249637	0.384204
BSN	-0.219553	0.0033553
BSN-DT	-0.195082	0.190676
BSND	-0.481902	0.0296935
BSPH1	0.144044	0.577499
BSPRY	-0.0708631	0.57552
BST1	-0.236611	0.13566
BST2	0.296629	0.221272
BSX	0.053589	0.928691
BTAF1	-0.394681	0.043933
BTBD1	0.13378	0.230425
BTBD10	0.0516474	0.568783
BTBD11	0.698304	1.30869e-07
BTBD16	0.273458	0.477492
BTBD17	1.65549	0.0138814
BTBD18	0.604008	0.479831
BTBD19	-0.0555452	0.740193
BTBD2	0.129332	0.333999
BTBD3	-0.291927	0.00674161
BTBD6	0.0288967	0.833973
BTBD7	-1.0065	0.00659816
BTBD8	-2.2243	0.000953062
BTBD9	-0.21956	0.302945
BTC	0.240301	0.0165907
BTD	-0.0341557	0.720297
BTF3	0.152122	0.556969
BTF3L4	0.105747	0.184804
BTG1	-0.0670679	0.821618
BTG2	-0.320161	0.297483
BTG2-DT	-0.406522	0.194975
BTG3	-0.0495014	0.805557
BTG3-AS1	-0.0233031	0.883907
BTG4	0.843952	0.316721
BTK	-0.0416898	0.840036
BTLA	0.425716	0.024203
BTN1A1	0.376553	0.642096
BTN2A1	-0.321911	0.00157483
BTN2A2	-0.085497	0.630246
BTN2A3P	-0.135113	0.222288
BTN3A1	-0.099264	0.646014
BTN3A2	-0.10721	0.773911
BTN3A3	-0.103017	0.623318
BTNL2	-0.705189	0.390943
BTNL3	-1.69335	0.00274023
BTNL8	-2.02417	0.0053506
BTNL9	-1.62516	1.80583e-08
BTRC	0.216982	0.0154011
BUB1	-0.598944	0.293199
BUB1B	0.452957	0.36956
BUB3	0.159216	0.0195305
BUD13	-0.202652	0.000674382
BUD23	0.386922	0.000108439
BUD31	0.139236	0.0800536
BVES	-0.268096	0.00355002
BVES-AS1	-0.16771	0.703629
BYSL	0.434554	0.00136934
BZW1	0.339993	0.0456033
BZW1-AS1	-0.251099	0.792254
BZW2	0.385118	0.00505626
C10orf105	0.152004	0.847319
C10orf120	0.0782565	0.797035
C10orf143	0.163694	0.00817055
C10orf53	0.828621	0.281252
C10orf55	3.11187	5.56332e-06
C10orf62	-1.30769	0.0573849
C10orf67	-0.564571	0.000161202
C10orf67-AS1	-1.89891	1.67909e-10
C10orf71	-1.35241	0.0109681
C10orf82	0.464939	0.628388
C10orf88	0.171581	0.0117023
C10orf90	0.562422	0.43085
C10orf95	0.40473	0.0163649
C10orf95-AS1	0.0807894	0.58163
C10orf99	1.58035	0.00136034
C11orf1	0.117819	0.0351554
C11orf16	0.88801	0.0182592
C11orf21	-0.329759	0.0325945
C11orf24	0.363116	0.000540912
C11orf40	-0.463936	0.423565
C11orf42	-0.87348	0.0123323
C11orf52	0.0404982	0.78946
C11orf53	1.1105	0.205356
C11orf54	-0.275076	0.128151
C11orf58	0.0417173	0.81464
C11orf65	-0.263913	0.469047
C11orf68	0.267149	0.0263963
C11orf71	-0.044049	0.52803
C11orf80	0.490425	3.43803e-05
C11orf86	1.68676	0.00236707
C11orf87	-1.01608	0.0911714
C11orf91	-1.03885	0.0690136
C11orf94	0.309057	0.522901
C11orf96	0.00143655	0.998154
C11orf97	0.941272	0.0973621
C11orf98	0.42493	7.45346e-06
C12orf29	-0.0709889	0.542058
C12orf4	0.200401	0.0226134
C12orf40	-1.34927	0.00930342
C12orf42	0.825131	0.285872
C12orf43	0.0971287	0.0637828
C12orf50	-0.15674	0.137762
C12orf54	-1.21339	0.0278802
C12orf56	0.324577	0.735122
C12orf57	0.192041	0.19066
C12orf60	-0.175954	0.147438
C12orf71	-0.842557	0.00166954
C12orf73	-0.129596	0.831595
C12orf75	0.553506	0.000129832
C12orf75-AS1	-0.237287	0.466391
C12orf76	0.0794891	0.380165
C13orf42	-0.326194	0.751501
C13orf46	-0.48062	0.000258183
C14orf119	0.234576	0.00526606
C14orf132	-0.505092	0.0050847
C14orf178	1.10677	0.0691926
C14orf180	0.380553	0.312776
C14orf28	-0.0356193	0.736327
C14orf39	1.8043	0.0138992
C14orf93	-0.217578	0.453432
C15orf32	0.372927	0.259801
C15orf39	-0.185948	0.153024
C15orf40	-0.0332209	0.719515
C15orf48	1.12544	7.97851e-07
C15orf61	-0.0185349	0.817062
C15orf62	0.0290259	0.821093
C16orf46	0.345796	0.0990068
C16orf54	0.130806	0.416871
C16orf72	-0.316284	0.0386688
C16orf74	0.536777	1.2556e-06
C16orf78	-2.02646	0.000287883
C16orf82	-0.615838	0.423092
C16orf86	-0.114566	0.360363
C16orf87	0.0013292	0.990995
C16orf89	0.0707952	0.819426
C16orf90	-0.759555	0.335376
C16orf91	0.273718	1.54703e-05
C16orf92	0.205041	0.660312
C16orf95	-0.119209	0.861869
C16orf95-DT	0.349957	0.00962116
C16orf96	0.106059	0.501095
C17orf100	0.167292	0.00652979
C17orf107	0.122614	0.406034
C17orf113	-0.218019	0.0733275
C17orf114	0.377698	0.295615
C17orf49	0.21453	0.00700884
C17orf50	0.38765	0.190634
C17orf58	0.0843521	0.603774
C17orf64	-0.710271	0.238823
C17orf67	-0.111278	0.197284
C17orf75	0.139459	0.075252
C17orf78	-0.358371	0.702035
C17orf80	0.0122668	0.924698
C17orf97	0.527167	0.000509595
C17orf98	0.647103	0.420717
C17orf99	-0.175661	0.503178
C18orf15	-0.122596	0.260794
C18orf21	0.185405	0.000703968
C18orf25	-0.169887	0.054815
C18orf32	0.00993305	0.940943
C18orf54	-0.283109	0.12611
C18orf63	-1.08567	0.0100966
C19orf12	0.17433	0.0065855
C19orf18	0.19299	0.123713
C19orf25	0.33649	0.000916681
C19orf33	0.278391	0.0987331
C19orf38	-0.286832	0.0342749
C19orf44	-0.110625	0.673696
C19orf47	0.108901	0.118694
[truncated: 22,758 more rows]
