# Supplementary material for: Transcriptomic and network analysis identifies shared and unique pathways and immune changes across fibrotic interstitial lung diseases
Source: Aging (Albany NY). 2024 Feb 12;16(4):3200–30. doi: 10.18632/aging.205530 (PMC10929820; doi:10.18632/aging.205530)
Supplement: Supplementary Table 2 [file aging-16-205530-s003.xlsx]

## Sheet: DEGs_IPF
Supplementary Table 2. Differentially expressed genes of IPF.
hgnc_symbol	FoldChange	adjusted_P.value
COL17A1	1.5658	6.12007e-18
TMEM59L	1.5226	7.88766e-18
CDH3	1.55254	9.73691e-18
GALNT13	-1.56704	1.39038e-17
PTGFRN	1.50025	2.79533e-17
KRT14	1.48071	2.79533e-17
HS6ST2	1.5381	4.36191e-17
MMP7	1.51474	4.36191e-17
AGTPBP1	-1.45992	5.85428e-17
DIO2	1.50085	6.76581e-17
MMP11	1.49021	7.27761e-17
BAAT	1.50486	8.14181e-17
IGFL2	1.50505	1.95898e-16
SCG5	1.49102	2.07095e-16
HPCAL1	-1.46019	2.07684e-16
NSG1	1.45693	2.81195e-16
MMP13	1.48302	2.98739e-16
AFF3	-1.46676	3.88271e-16
SYT12	1.48408	4.80697e-16
DNAJC22	1.41309	4.97026e-16
CRABP2	1.46727	4.97026e-16
SUGCT	1.43014	5.42595e-16
CDH2	1.45904	6.09067e-16
ITLN2	-1.46699	6.34552e-16
IGFL1	1.41736	6.6073e-16
NECAB1	-1.47103	6.71865e-16
LY6D	1.41219	6.803e-16
N4BP1	-1.44815	7.29146e-16
PROM2	1.4158	7.40351e-16
FRMD5	1.4808	7.74622e-16
SULF1	1.43755	8.01933e-16
ADGRB2	1.40196	8.09602e-16
IL13RA2	1.50104	9.06385e-16
CFH	1.42883	9.14933e-16
FHL2	1.45987	1.03072e-15
CYP27C1	1.4749	1.07343e-15
EPHA10	1.47216	1.14287e-15
CXCL14	1.44221	1.18594e-15
CA4	-1.45013	1.28559e-15
ABCA12	1.46378	1.3531e-15
HR	1.43608	1.36942e-15
COMP	1.44021	1.46502e-15
DIRAS1	1.45493	1.72613e-15
FNDC1	1.44169	1.72613e-15
GPR87	1.43372	1.75647e-15
KRT17	1.45527	2.02927e-15
ADRA1A	-1.45066	2.14384e-15
UNC5B-AS1	1.40653	2.85421e-15
MYO3B	1.44964	3.24044e-15
P2RY1	-1.40217	3.36439e-15
PAPSS2	-1.42026	3.68914e-15
CHRM3	-1.44341	3.8073e-15
ADAMTS14	1.43236	3.8625e-15
SPRR1A	1.33789	3.97202e-15
GOLM1	1.39236	4.31463e-15
COL10A1	1.41114	4.61041e-15
PDLIM4	1.42251	6.84145e-15
SYT16	1.44071	6.84145e-15
CILP2	1.43081	7.03032e-15
CTHRC1	1.40382	7.85671e-15
CNTN3	1.37613	8.39047e-15
DENND3	-1.38338	8.39047e-15
LINC02016	-1.43253	8.44782e-15
MAP3K15	-1.44064	8.57111e-15
CCBE1	-1.38996	8.68865e-15
KCNMB4	-1.40222	8.68865e-15
ESAM	-1.37436	9.28287e-15
CPNE4	1.41644	9.46863e-15
VEGFD	-1.41168	9.85374e-15
MAGED4B	1.37367	1.11257e-14
BTNL9	-1.42004	1.25437e-14
SPRR1B	1.35425	1.27915e-14
COL22A1	1.42887	1.30884e-14
LIN7A	-1.39478	1.42015e-14
PCP4	1.3977	1.42015e-14
COL14A1	1.38956	1.50307e-14
C10orf67-AS1	-1.41273	1.55498e-14
CCDC85A	-1.3874	1.55915e-14
CD24	1.35673	1.64141e-14
ARHGAP6	-1.39079	1.70761e-14
KLRG2	-1.39382	1.9729e-14
CLDN2	1.42749	1.97687e-14
SPTBN2	1.38487	2.21251e-14
VSIG10	-1.38711	2.22003e-14
RET	1.38503	2.26097e-14
KCTD1	1.35279	2.30446e-14
LINC02997	-1.38976	2.33647e-14
PTPRB	-1.36952	2.66188e-14
CHPT1	-1.39053	2.66217e-14
FGF11	1.3926	2.8081e-14
ABCC13	-1.38789	2.88457e-14
RHBDL2	1.38558	2.935e-14
MMP16	1.37524	3.00186e-14
OTULINL	-1.36378	3.1331e-14
PRSS2	1.36437	3.41055e-14
GPX3	-1.38038	3.49804e-14
DIPK1A	1.37052	3.60074e-14
MMP1	1.41926	3.64946e-14
SFRP2	1.38283	3.74032e-14
MACROH2A2	1.37292	3.79827e-14
WNT10A	1.37899	3.91396e-14
MAGED4	1.36014	3.99762e-14
TWIST1	1.37401	4.1429e-14
DOK5	1.39167	4.1513e-14
TRPV6	1.35762	4.16221e-14
B3GNT3	1.35503	4.28887e-14
ECEL1P2	-1.36581	4.35277e-14
GAP43	1.3877	4.49411e-14
TENM4	1.35044	4.674e-14
CYP24A1	1.38184	4.86321e-14
GREM1	1.39113	4.86982e-14
MYO16-AS1	-1.37799	5.01963e-14
RXFP1	-1.36526	5.03294e-14
GRHL3	1.35797	5.46486e-14
RNF182	-1.36869	5.57484e-14
WWC2	-1.37758	5.61239e-14
STARD13	-1.34161	5.94463e-14
STRA6	1.37952	6.00539e-14
KRT75	1.29348	6.08106e-14
KLK6	1.29216	6.29831e-14
LRRTM1	1.34461	6.56753e-14
RPS6KA2	-1.34762	6.56753e-14
PTCHD4	1.38063	6.63788e-14
DSG3	1.38275	6.72881e-14
HTR2A	1.37264	6.94724e-14
GJB2	1.3894	7.25177e-14
MEX3A	1.36025	7.33219e-14
FERMT1	1.37396	7.60637e-14
FAT1	1.36665	7.68748e-14
THSD7B	1.38643	7.83288e-14
HECW1	1.35459	8.03913e-14
CLDN1	1.35303	8.17967e-14
SERPINB5	1.36125	8.17967e-14
MYO10	-1.33448	8.30539e-14
ALDH1A3	1.37938	8.30601e-14
AATK	-1.35926	8.3897e-14
NECTIN1	1.37377	8.53394e-14
CFI	1.35105	8.93531e-14
GPIHBP1	-1.36914	9.05952e-14
RNF144B	-1.34647	9.45623e-14
PTPRM	-1.34597	9.52586e-14
MROCKI	-1.37327	9.57034e-14
S100A2	1.39986	9.63427e-14
KLHL13	1.33385	9.68722e-14
GCNT3	1.37403	9.81582e-14
PRX	-1.35922	9.89595e-14
OGDHL	1.32151	1.02689e-13
COL7A1	1.38282	1.03906e-13
SAMD11	1.34728	1.05068e-13
ZMAT3	1.35423	1.06685e-13
TUBB3	1.36741	1.1637e-13
ARRB1	-1.36348	1.17061e-13
PLLP	-1.36981	1.23335e-13
HPSE2	1.35563	1.23462e-13
AGER	-1.349	1.29636e-13
TRIM2	1.33377	1.31623e-13
FAM83B	1.3472	1.51369e-13
EPB41L5	-1.35554	1.52122e-13
NOTCH4	-1.35866	1.53136e-13
NEBL	-1.34785	1.61324e-13
ASPN	1.34588	1.61364e-13
CDH13	-1.36077	1.62475e-13
BACE2	1.36077	1.69364e-13
THY1	1.33451	1.70188e-13
ZNF469	1.32775	1.71706e-13
SLC4A11	1.33309	1.75361e-13
POSTN	1.34103	1.76082e-13
KRT5	1.34519	1.84979e-13
LRRN1	1.3329	1.94999e-13
FUT2	1.34674	2.02368e-13
IGSF9	1.32542	2.04373e-13
CAPN5	1.32218	2.15038e-13
FZD5	-1.30694	2.15321e-13
LTBP1	1.33785	2.16026e-13
RASAL1	1.36122	2.20069e-13
CST2	1.32344	2.20069e-13
LDLRAD4	1.32067	2.23199e-13
GRIA1	-1.33586	2.26873e-13
P4HA3	1.36638	2.48855e-13
TNS4	1.3363	2.5082e-13
PRSS1	1.32818	2.5227e-13
SLCO1A2	-1.36254	2.56913e-13
MAP4K2	-1.34862	2.58209e-13
NMNAT2	1.33476	2.72669e-13
ASIC1	1.28921	2.82157e-13
REEP2	1.31975	2.85545e-13
MYZAP	-1.35245	2.96463e-13
LINC01426	1.35558	3.04193e-13
TJP1	-1.34042	3.18978e-13
THBS4	1.33778	3.24894e-13
RS1	-1.33465	3.30112e-13
BTNL8	-1.35291	3.34853e-13
UNC13D	-1.31872	3.35081e-13
STX11	-1.29849	3.49777e-13
CHRDL2	1.35908	3.70278e-13
TPBG	1.31578	3.74587e-13
TNS3	-1.31781	3.87363e-13
UPB1	-1.33124	3.89644e-13
SH2D3C	-1.32115	4.07467e-13
HLA-E	-1.30156	4.10931e-13
HIF3A	-1.34821	4.13728e-13
KANK3	-1.32571	4.30227e-13
TACR3	-1.31206	4.44885e-13
POPDC3	-1.36506	4.44885e-13
PAQR7	1.28224	4.44885e-13
PPFIBP1	-1.31406	4.44885e-13
PLXNA4	1.32742	4.51253e-13
TMPRSS4	1.33466	4.59924e-13
COL15A1	1.32217	4.61686e-13
ARHGAP29	-1.32988	4.68605e-13
DAPK2	-1.33145	4.70661e-13
C1orf115	-1.32994	4.76016e-13
TOX2	-1.31128	4.98451e-13
TMEM215	1.31117	5.04892e-13
RBMS2	-1.32221	5.0699e-13
PPP2R5A	-1.32006	5.39241e-13
MYRF	-1.33586	5.47649e-13
MME	-1.32923	5.54263e-13
MAP3K3	-1.31298	5.77072e-13
GNAO1	1.32035	6.06035e-13
DCLK1	1.3058	6.14016e-13
GSDMC	1.31526	6.48126e-13
TMEM229A	1.30753	6.58593e-13
RAB7B	1.29938	6.62014e-13
PICSAR	-1.34122	6.72327e-13
SSC5D	1.30284	6.84244e-13
TFAP2A	1.29928	6.86046e-13
UCN2	1.33588	6.90523e-13
ENTPD1	1.32442	7.29179e-13
UGT1A6	1.32118	7.36748e-13
PODXL2	1.31193	7.50188e-13
STXBP6	-1.33748	7.88402e-13
KRT16	1.31863	8.09709e-13
ARHGEF26	-1.32951	8.14878e-13
GRIA3	1.3158	8.1927e-13
HYAL1	-1.33148	8.76437e-13
DRD5	1.31188	9.07456e-13
SLC39A8	-1.28738	9.31525e-13
TSHZ2	1.28577	9.31732e-13
PCDH7	1.29672	9.4246e-13
USP25	-1.28468	9.47437e-13
ROBO1	1.30566	9.53833e-13
DSC3	1.30786	9.78272e-13
FAM167A	-1.32422	9.86369e-13
FUT1	-1.30151	9.91391e-13
SRRM3	1.28393	1.01055e-12
SALL4	1.31235	1.01524e-12
RRAS	-1.28783	1.02864e-12
ODAM	-1.31295	1.04221e-12
TMEM132E	1.30131	1.04221e-12
VSIR	-1.27543	1.06671e-12
PADI1	1.29185	1.11827e-12
SLIT2	-1.30783	1.12194e-12
EDNRB	-1.3005	1.13445e-12
COCH	1.31582	1.18584e-12
RGCC	-1.28985	1.22654e-12
ARL9	1.29683	1.26371e-12
GSDME	1.33115	1.28532e-12
CTSK	1.30885	1.29882e-12
FAM83A	1.32648	1.30105e-12
GNAQ	-1.2928	1.32851e-12
CD36	-1.30181	1.3695e-12
PSD3	1.29788	1.38159e-12
ADGRF4	1.27932	1.39944e-12
PTHLH	1.29774	1.51473e-12
EFNB3	1.25387	1.52075e-12
PROC	1.29115	1.53202e-12
SNX1	-1.28378	1.55778e-12
GNB5	1.28652	1.60692e-12
MS4A15	-1.29871	1.60692e-12
ZNF385D	1.3082	1.64644e-12
SLC9A3R2	-1.30817	1.65534e-12
LRRC17	1.29961	1.69284e-12
CNOT8	-1.29018	1.7212e-12
HHAT	1.25472	1.75356e-12
CASKIN2	-1.2802	1.77323e-12
EPHA3	1.30413	1.80776e-12
SLC19A3	-1.31722	1.82722e-12
LGI2	1.31632	1.83544e-12
GYG2	1.25164	1.83544e-12
SPTBN1	-1.28585	1.91279e-12
AOC1	1.31169	1.95509e-12
EYA2	1.27461	1.95509e-12
MIR31HG	1.26191	1.96679e-12
NELL1	1.31386	1.99445e-12
ELOVL4	1.28881	2.02107e-12
AGO4	-1.29476	2.0327e-12
KRT15	1.30519	2.03545e-12
ADAMTS19	1.26276	2.04613e-12
PKN1	-1.26732	2.04613e-12
TRIM32	1.26487	2.05323e-12
LAMP5	1.30317	2.21303e-12
EPAS1	-1.28413	2.22572e-12
TNFSF11	1.30239	2.23e-12
KCND3	1.30964	2.24828e-12
ARHGAP31	-1.25274	2.28881e-12
PDZD2	-1.28464	2.30877e-12
DOCK4	-1.26733	2.31989e-12
QKI	-1.27025	2.33663e-12
KCNN4	1.31596	2.37868e-12
RAB3C	1.2939	2.41365e-12
HHLA2	1.29033	2.42589e-12
DMAC2	-1.26951	2.43328e-12
SPAAR	-1.31061	2.49786e-12
ADAMTS16	1.30307	2.67596e-12
RMND5B	-1.2825	2.67596e-12
SPRYD7	-1.28817	2.7267e-12
HSPA4L	1.28718	2.78355e-12
ACTBL2	1.27366	2.80473e-12
TMEM200C	1.28283	2.84335e-12
PLAG1	-1.30507	2.92415e-12
MTTP	1.27106	2.97123e-12
ANXA3	-1.28933	2.98375e-12
GALNT18	-1.26353	3.12581e-12
MTSS1	-1.30639	3.13055e-12
ABCA4	1.28764	3.15616e-12
ADAM23	1.31477	3.15616e-12
IGDCC4	1.2868	3.19261e-12
PLEKHM3	-1.273	3.19591e-12
SNAP25	1.29295	3.38474e-12
SNX22	-1.29137	3.39114e-12
CROT	1.25826	3.45831e-12
PTPRH	1.27968	3.47912e-12
ZNF438	-1.24204	3.64102e-12
INPP5K	-1.28503	3.66584e-12
PDE7B	1.2848	3.78781e-12
SMO	1.24937	3.81126e-12
SLC44A3-AS1	1.26864	3.83081e-12
GAB2	-1.23706	3.92432e-12
ADAM12	1.28779	3.92432e-12
CHRM2	-1.28762	4.03206e-12
PODNL1	1.25692	4.24e-12
IFNE	1.23743	4.24238e-12
ACVRL1	-1.26655	4.44792e-12
BOC	1.25618	4.44792e-12
MDK	1.28117	4.4662e-12
SLC4A3	1.24092	4.5288e-12
STARD8	-1.25661	4.53909e-12
ALKAL1	1.26403	4.59112e-12
ESAM-AS1	-1.29916	4.62441e-12
PKNOX2	-1.27773	4.83122e-12
PLPPR4	1.27162	5.48346e-12
CACNA1G	1.30178	5.52003e-12
ST6GALNAC3	-1.2674	5.71678e-12
EIF4E3	-1.27108	5.8022e-12
CACNA2D3	-1.29893	5.93727e-12
ARHGAP27	-1.25349	6.19107e-12
TEK	-1.25689	6.43341e-12
HABP2	1.27652	6.5431e-12
CRLF1	1.29574	6.68197e-12
MATN3	-1.28088	6.69832e-12
LINC00968	-1.28172	6.7664e-12
IVL	1.28272	7.06558e-12
BRSK1	1.26243	7.18465e-12
ST6GAL1	1.24709	7.26511e-12
MAP3K21	-1.26064	7.28503e-12
MPP3	-1.28541	7.34071e-12
FCN3	-1.26412	7.34245e-12
SYN2	-1.29528	7.42009e-12
BDKRB2	1.28835	7.71157e-12
LINC00165	-1.26421	7.75468e-12
KCNH8	1.28003	7.81182e-12
CD207	1.28503	7.86923e-12
RTKN2	-1.26322	7.94909e-12
ALDH18A1	1.26506	7.97701e-12
TMEM45A	1.28476	8.03212e-12
GLB1L3	1.30233	8.18848e-12
CD1A	1.28564	8.31548e-12
CPNE2	-1.25814	8.436e-12
NCS1	1.25842	8.47477e-12
CTNND2	-1.28131	8.55002e-12
FUT8	1.25881	8.65906e-12
NOVA2	-1.2689	8.67881e-12
CECR2	-1.27261	8.68004e-12
CCND2	1.27725	8.74786e-12
CALCOCO2	-1.27709	8.88419e-12
MUC12	1.23933	8.94749e-12
C4B	1.27128	9.84878e-12
CABYR	1.26078	9.87816e-12
ADIPOR2	-1.25185	9.96404e-12
KHDRBS3	-1.25148	1.01096e-11
VTCN1	1.25612	1.028e-11
ACY3	1.25265	1.0344e-11
GCOM1	-1.26587	1.06504e-11
ADAMTS18	1.27162	1.06818e-11
CSF3R	-1.23097	1.0693e-11
TSPAN11	1.24901	1.07289e-11
STX3	-1.22627	1.07986e-11
SEL1L3	1.26547	1.08875e-11
EPHB2	1.25933	1.11767e-11
ITGB4	1.23464	1.1251e-11
LGALS7B	1.2648	1.13438e-11
SCAMP5	1.25007	1.17725e-11
TMEM204	-1.25824	1.19951e-11
F2RL2	1.26434	1.20651e-11
AFF2	-1.22794	1.23889e-11
FGFR4	-1.24347	1.25962e-11
VSIG10L2	1.24315	1.28822e-11
NPR1	-1.25851	1.28881e-11
EFNB2	-1.26882	1.31111e-11
ZNF385B	-1.2393	1.33506e-11
CTNNBIP1	-1.23556	1.35453e-11
DOCK9	-1.23863	1.3691e-11
ADRB2	-1.22731	1.37116e-11
NHS	1.25687	1.37664e-11
RALGPS2	1.26421	1.39314e-11
ECHDC3	-1.25442	1.40499e-11
VWCE	1.26027	1.40667e-11
KRT6A	1.27726	1.41855e-11
SLC28A3	1.28073	1.463e-11
ACADL	-1.26486	1.46303e-11
BNIP5	1.23663	1.46662e-11
ALDH1A3-AS1	1.25518	1.5236e-11
WBP2	-1.22978	1.52396e-11
FAM83D	1.25829	1.54712e-11
RGS9BP	-1.25616	1.58417e-11
SYN3	-1.26235	1.59561e-11
MAPK3	-1.24795	1.62241e-11
RDX	-1.24041	1.65356e-11
RAPH1	-1.2353	1.66986e-11
USHBP1	-1.26092	1.71566e-11
SYT15B	-1.24923	1.72388e-11
TINCR	-1.27149	1.73861e-11
SPRR2D	1.24816	1.76273e-11
LINC02560	1.26259	1.80006e-11
MAOA	-1.2437	1.8261e-11
LIFR	-1.25328	1.85824e-11
WWC3	-1.22801	1.87566e-11
TPST2	-1.23133	1.87978e-11
DSEL	-1.24306	1.88088e-11
ARMH4	1.21273	1.88375e-11
RHOXF1-AS1	-1.25004	2.03455e-11
FAM225B	1.2395	2.04009e-11
CXCL13	1.28943	2.04949e-11
POU2AF1	1.27478	2.10144e-11
KIF26B	1.25676	2.11804e-11
GGTLC1	-1.22861	2.12435e-11
FLNC	1.24662	2.19515e-11
SEMA6A	-1.25247	2.27465e-11
SYNJ2	1.25294	2.31659e-11
TAOK3	-1.20571	2.38551e-11
MYL12A	-1.18847	2.39509e-11
FNDC4	1.25417	2.44673e-11
EMP2	-1.23189	2.53217e-11
CCND3	-1.22609	2.63965e-11
ARHGAP19	-1.23019	2.66364e-11
MXRA5	1.22933	2.77242e-11
EDA	-1.24957	2.7945e-11
TMEM117	1.22027	2.79554e-11
CLIC6	1.22134	2.88865e-11
SUN2	-1.22645	2.91437e-11
ARHGEF10	-1.23702	2.95494e-11
CARHSP1	-1.21007	3.00872e-11
TNFRSF21	1.22463	3.08228e-11
FAT2	1.25293	3.163e-11
RADIL	-1.24737	3.22773e-11
NRGN	-1.22305	3.25075e-11
AQP5-AS1	1.21745	3.25075e-11
MMP10	1.25697	3.25813e-11
TUBB2B	1.2489	3.29752e-11
TMEM182	1.22994	3.30083e-11
PLEKHN1	1.25678	3.331e-11
CDH5	-1.21713	3.3542e-11
NCAPH2	-1.21421	3.39563e-11
ADGRA3	1.21491	3.47163e-11
CRTAC1	-1.22208	3.58158e-11
ANKRD27	-1.23894	3.58766e-11
DERL3	1.24657	3.63236e-11
MAP1A	1.21092	3.70205e-11
SERPINB13	1.18328	3.76118e-11
OCLN	-1.22428	3.79762e-11
HES2	1.21771	3.81272e-11
MTARC2	-1.22738	3.8281e-11
IRAG1	1.24043	3.84717e-11
STARD3	-1.22731	3.86816e-11
SLCO5A1	1.24749	3.87546e-11
MTARC1	-1.23525	3.89028e-11
FRYL	-1.22191	3.92757e-11
CALML3	1.19116	3.93169e-11
IGFBP2	1.19992	3.97783e-11
MEF2A	-1.21444	4.02259e-11
SESTD1	-1.24464	4.05534e-11
RIN2	-1.24806	4.23384e-11
HHIP-AS1	-1.22656	4.30666e-11
SLC1A4	1.23985	4.44864e-11
CA2	-1.22065	4.4955e-11
CP	1.25006	4.54583e-11
FBLN2	1.20551	4.55508e-11
AFAP1L1	-1.21708	4.62812e-11
NTN1	1.20934	4.62853e-11
TTC39C	1.20716	4.62952e-11
LINC02593	1.21227	4.71558e-11
PAK4	-1.22958	4.71865e-11
ALDH1B1	1.23472	4.75812e-11
EFNA5	1.2128	4.75969e-11
OCIAD2	1.19751	4.80845e-11
FGD5	-1.22001	4.98713e-11
IGSF9B	1.244	5.0049e-11
LINC02289	-1.26682	5.03763e-11
ALPP	-1.22182	5.07535e-11
CCDC68	-1.24289	5.09237e-11
MEOX1	1.21941	5.10936e-11
OAF	1.22379	5.17274e-11
CPXM2	1.19994	5.1815e-11
FDCSP	1.21774	5.30164e-11
PRTG	-1.22141	5.37577e-11
FAM83A-AS1	1.19819	5.49789e-11
BNC1	1.22682	5.57762e-11
AKR1B10	1.2268	5.64813e-11
TP63	1.2143	5.65069e-11
FBXW4	-1.21458	5.6721e-11
C1orf198	-1.21719	5.7623e-11
SLC5A9	-1.24139	5.76302e-11
SCRG1	1.23856	5.76302e-11
WSCD2	1.21755	5.89511e-11
CCNB1IP1	-1.22063	5.98635e-11
NKX1-2	1.13712	6.00876e-11
ST6GALNAC5	-1.20859	6.1419e-11
CLEC14A	-1.21344	6.28355e-11
SHISAL1	1.2348	6.34094e-11
VAMP3	-1.21231	6.39098e-11
TGFBR2	-1.20062	6.46273e-11
SUSD4	1.19263	6.52052e-11
ASB2	1.21391	6.52052e-11
ZNF215	1.24397	6.56637e-11
NCKAP5	-1.20546	6.61641e-11
GAB1	-1.21575	6.63751e-11
TNN	1.2303	6.63751e-11
LINC00578	1.22007	6.65275e-11
C1QL2	1.22068	6.7018e-11
SERPIND1	1.24819	6.78686e-11
VIPR1	-1.23025	6.79659e-11
CRISPLD1	1.18757	6.88613e-11
ATP2A2	1.21097	6.91796e-11
SERTM1	-1.23674	7.05362e-11
SSTR1	-1.23789	7.10226e-11
HNF4A	1.20305	7.11488e-11
DNM1	1.1998	7.11488e-11
NDRG4	-1.22391	7.14474e-11
SIX4	1.2164	7.2056e-11
L3MBTL4	-1.21993	7.48866e-11
PGM2L1	1.20699	7.7258e-11
KIAA0408	-1.21132	7.74913e-11
WFDC12	-1.22262	7.77606e-11
TAL1	-1.22084	7.80128e-11
GRK5	-1.18984	7.82408e-11
PCIF1	-1.20903	7.83971e-11
ADARB2	-1.21212	7.84178e-11
STK32A	1.21733	7.84533e-11
TSPAN14	-1.18391	7.85193e-11
PLPP5	1.21513	7.87604e-11
JCAD	-1.20594	7.92479e-11
SYT15	-1.215	8.09825e-11
BHLHE22	1.2142	8.33016e-11
B3GALNT1	-1.21213	8.35159e-11
GREM2	1.22897	8.35159e-11
CST1	1.14703	8.52745e-11
WIPF2	-1.18802	8.80008e-11
SERPINF1	1.19661	8.82204e-11
ZNF467	-1.19431	8.87608e-11
NUMB	-1.19953	8.91392e-11
PLPP2	1.21391	9.07438e-11
MYO1C	-1.19978	9.14268e-11
COL1A1	1.19967	9.23856e-11
PITPNM2	-1.19745	9.29908e-11
ITPRID2	-1.19352	9.33041e-11
GPC1	1.21637	9.34357e-11
RHOD	1.18453	9.52836e-11
MCUR1	-1.18625	9.84792e-11
LINC02941	-1.21887	9.88667e-11
NMUR1	-1.24286	9.94007e-11
INMT	-1.21181	9.94982e-11
HSD17B6	-1.20581	1.00138e-10
SHE	-1.20516	1.02226e-10
SASH1	-1.19408	1.03236e-10
ST6GALNAC1	1.19098	1.03459e-10
PHACTR1	-1.19064	1.03847e-10
SYTL2	1.18306	1.04413e-10
PEBP4	-1.19863	1.07147e-10
FBXO7	-1.18393	1.10765e-10
NGFR	1.20007	1.12733e-10
MTMR14	-1.17888	1.1362e-10
PPM1J	1.2128	1.18373e-10
SEC14L2	1.22838	1.18775e-10
RIPOR1	-1.17973	1.19531e-10
HMGB3	1.21733	1.19574e-10
LRRC57	-1.21548	1.20978e-10
TRIM55	1.19396	1.21429e-10
CDKN2A	1.21557	1.232e-10
MAN2A2	-1.18272	1.23552e-10
GDA	1.20433	1.24439e-10
RAPGEF5	-1.18301	1.26588e-10
EXOC3L1	-1.20504	1.29734e-10
KRT6B	1.17825	1.29734e-10
KIAA1755	1.18877	1.34792e-10
SGCG	-1.23069	1.35113e-10
IGF1	1.20039	1.36036e-10
MLIP	1.17306	1.39444e-10
MACF1	-1.182	1.42206e-10
TRAK2	-1.18403	1.42507e-10
RIMKLA	-1.20092	1.42877e-10
KLRF1	-1.22425	1.45123e-10
CNTN6	-1.20207	1.47228e-10
GPRIN2	-1.18215	1.50506e-10
SLN	1.20044	1.51034e-10
ITGB8	1.17824	1.51344e-10
ARID3B	-1.17638	1.51536e-10
DPP10	1.18288	1.52232e-10
MKNK2	-1.2101	1.52347e-10
AQP5	1.19703	1.52347e-10
KIF1C	-1.18248	1.66393e-10
CDCA7	1.20813	1.67194e-10
BEAN1	1.21787	1.67749e-10
FAM43B	1.19962	1.68899e-10
SIPA1	-1.15967	1.70208e-10
DLC1	-1.19311	1.76412e-10
KLF11	-1.1883	1.79187e-10
WNT3A	-1.19153	1.82907e-10
PTPN21	-1.19878	1.85e-10
SLC25A12	1.17474	1.97573e-10
ZDHHC13	1.17896	1.99868e-10
ISM1	1.1937	1.99931e-10
LINC01614	1.18349	2.01739e-10
CAVIN2	-1.19905	2.02061e-10
DGKI	1.18341	2.08998e-10
GIMAP6	-1.18319	2.09898e-10
MIDEAS	-1.18005	2.16032e-10
HMBOX1	-1.20281	2.21385e-10
MAP2	-1.17808	2.22358e-10
EDA2R	1.18681	2.2678e-10
RAPGEF2	-1.15264	2.28897e-10
RAB26	1.16659	2.29548e-10
LRRC4C	1.21274	2.33729e-10
TMEM158	1.18825	2.35898e-10
THBS2	1.1871	2.35898e-10
CLCA2	1.1889	2.38954e-10
URB1	1.17833	2.38985e-10
TM7SF3	1.15525	2.4364e-10
NCDN	1.18234	2.4364e-10
LAMC3	-1.17353	2.45051e-10
GJB4	1.18258	2.55087e-10
MYLIP	-1.1864	2.57013e-10
CLCN4	-1.17218	2.58172e-10
ENC1	1.1766	2.58315e-10
PLCH2	1.18585	2.58639e-10
GIMAP8	-1.18212	2.59377e-10
CASP12	-1.20161	2.59644e-10
FAM219A	-1.17169	2.61314e-10
CHST6	1.17174	2.65475e-10
MIR205HG	1.18465	2.67739e-10
FBXO16	1.1658	2.73471e-10
DNPEP	-1.16945	2.74423e-10
DNAJC12	1.17847	2.76347e-10
KAT2B	-1.18317	2.7678e-10
PAMR1	1.15646	2.78252e-10
PLEK2	1.19179	2.81057e-10
CERS2	-1.17398	2.8923e-10
TDO2	1.20646	2.9205e-10
PROB1	1.17903	2.99382e-10
LNCTAM34A	1.14658	3.03885e-10
RXRG	-1.18831	3.06701e-10
WWC2-AS2	-1.18702	3.08341e-10
PCSK1N	1.17668	3.09195e-10
TNNC1	-1.17217	3.10047e-10
ASPG	-1.20767	3.15828e-10
GPD1L	-1.16936	3.16496e-10
SLC52A1	1.15357	3.18031e-10
STEAP3	1.16257	3.18391e-10
CNFN	1.17504	3.20548e-10
LRRN3	-1.18796	3.24675e-10
SH3BP5	-1.16803	3.25591e-10
EFNB1	-1.16012	3.26216e-10
MFNG	-1.16558	3.28995e-10
TNNT2	-1.17435	3.29132e-10
ARNTL2	1.18161	3.30121e-10
SEPTIN10	-1.17995	3.30867e-10
SORCS2	1.18356	3.35384e-10
ABCB4	1.1986	3.35692e-10
SSUH2	1.17422	3.43188e-10
LINC02984	1.17074	3.45101e-10
METTL8	1.18555	3.47481e-10
MMP3	1.17116	3.50818e-10
TMEM178B	1.17084	3.57343e-10
MFAP2	1.16923	3.58084e-10
STEAP1	1.1824	3.58153e-10
CDH19	-1.186	3.58341e-10
STRADB	-1.1718	3.66063e-10
CCL22	1.21217	3.68808e-10
EIF4EBP2	-1.17253	3.69318e-10
PEAK1	-1.16828	3.79721e-10
NGEF	1.15597	3.81361e-10
MTMR10	-1.17878	3.8528e-10
TRPC3	-1.20106	3.91069e-10
CD302	-1.16607	3.91547e-10
IFNGR1	-1.14671	3.93311e-10
FAIM2	1.16809	3.96305e-10
SYCP2L	-1.18714	4.01866e-10
RAB6B	1.14162	4.02933e-10
MZB1	1.19506	4.04304e-10
LIMS2	-1.18197	4.04888e-10
MYEOV	1.2038	4.06044e-10
AGTR1	-1.17636	4.0728e-10
ANKH	1.17117	4.12865e-10
GPM6A	-1.1957	4.16039e-10
LINC00242	1.17327	4.16154e-10
KCNK2	1.18223	4.23377e-10
P3H2	-1.1674	4.24881e-10
PIP5K1B	-1.16285	4.25321e-10
HOXC4	1.14028	4.25786e-10
CTSE	1.18525	4.27326e-10
ANK2	1.17941	4.29525e-10
SPP1	1.20158	4.29974e-10
NECTIN4	1.15413	4.32121e-10
LINC02532	1.15242	4.36923e-10
NRG3	-1.19872	4.39961e-10
CYP3A5	-1.18987	4.46642e-10
DNM2	-1.14472	4.48403e-10
ADGRL2	-1.14152	4.49705e-10
KL	-1.16451	4.56665e-10
BRINP3	1.17469	4.64895e-10
RHOT1	-1.15532	4.64895e-10
COL3A1	1.16138	4.66782e-10
SMOC1	1.1741	4.67884e-10
AIG1	1.15341	4.72241e-10
FIBIN	-1.18544	4.74715e-10
VPREB3	1.19899	4.7951e-10
RBPMS-AS1	-1.17625	4.7951e-10
FRMD6	1.16702	4.79598e-10
MED4-AS1	-1.19405	4.85176e-10
ENTPD2	1.1364	4.85723e-10
CACNA2D2	-1.15393	4.96664e-10
INAVA	1.14562	5.04503e-10
PTPRQ	-1.20246	5.06265e-10
BBOX1	1.14583	5.07776e-10
ALDH3A1	1.15973	5.07924e-10
TMEM100	-1.18507	5.20132e-10
SCARA3	1.15474	5.23097e-10
DOCK3	1.17184	5.28862e-10
C19orf54	-1.18022	5.4532e-10
MINAR1	1.17204	5.48515e-10
F11-AS1	-1.15143	5.5325e-10
EFR3B	-1.1804	5.53391e-10
LYPD1	1.18809	5.5591e-10
ARAP3	-1.16679	5.58861e-10
PCDH12	-1.17319	5.71958e-10
TSPAN7	-1.15512	5.74877e-10
IBA57	-1.18563	5.80797e-10
TNS1	-1.16079	5.8244e-10
MTCH1	-1.15422	5.84237e-10
PPFIA2	1.16532	5.99004e-10
PNMA1	1.1261	6.20178e-10
ACTG2	1.16867	6.2101e-10
SLURP2	1.16581	6.27208e-10
PRDX4	1.16643	6.28466e-10
GLIS1	1.16505	6.28544e-10
MID1IP1	-1.16355	6.3704e-10
MOCS1	-1.1546	6.43619e-10
CKMT1A	1.1453	6.48982e-10
PRKD1	-1.16771	6.50597e-10
LIMCH1	-1.14076	6.78324e-10
DERA	-1.1303	6.87081e-10
VWA5A	1.16217	6.94121e-10
CAV1	-1.14786	7.0548e-10
APOL3	-1.16731	7.12397e-10
EGLN2	-1.16559	7.14785e-10
KDM5B	1.14568	7.21219e-10
ZNF436	1.15526	7.28587e-10
FKBP1B	-1.15769	7.33999e-10
PEAR1	-1.14672	7.42071e-10
CKMT1B	1.13327	7.479e-10
TIMP3	-1.1619	7.50858e-10
ITGA11	1.14405	7.64813e-10
KIR2DL1	-1.16009	7.72122e-10
ADGRF5	-1.1501	7.74021e-10
OSBPL3	1.13368	7.81644e-10
SDK2	1.17565	7.83548e-10
UNC13B	-1.14713	7.9553e-10
DEFB124	1.13282	7.9887e-10
ADGRD1	-1.15611	8.06034e-10
REPS2	-1.14805	8.07405e-10
GPM6B	-1.15706	8.10662e-10
CFB	1.17205	8.12395e-10
LSS	-1.16647	8.17518e-10
LEF1	1.16796	8.2523e-10
VGLL3	-1.14317	8.48904e-10
EGFL7	-1.16928	8.68668e-10
PNMT	-1.16583	8.71086e-10
SNX15	-1.14189	8.82209e-10
CPAMD8	-1.14535	8.89453e-10
PTPN12	-1.10854	8.92134e-10
CPNE5	1.17602	8.9258e-10
OLFML2A	-1.15629	8.96017e-10
FOXO4	-1.15847	9.09089e-10
REP15	-1.15888	9.14769e-10
F11	-1.13513	9.32201e-10
FOXA3	1.13379	9.32245e-10
SVEP1	-1.14973	9.32245e-10
NALF2	1.14912	9.36652e-10
RHBDL1	1.1447	9.58717e-10
NPNT	-1.1385	9.61236e-10
MUC12-AS1	1.13975	9.71334e-10
KLHL4	1.14785	9.73355e-10
DISP1	-1.16671	9.74654e-10
CLIC5	-1.15679	9.78955e-10
ATP10B	1.17055	9.90735e-10
RAD21	-1.12777	9.95439e-10
EFCC1	-1.16049	9.95902e-10
MSI2	1.13883	1.00692e-09
SLC35F2	1.16664	1.01432e-09
NPR3	-1.15292	1.02911e-09
S1PR1	-1.11225	1.06288e-09
CRABP1	1.14804	1.08159e-09
HSPA12B	-1.15933	1.09717e-09
C11orf80	1.14626	1.09918e-09
KLHDC8A	1.16071	1.1164e-09
CHRM1	-1.16494	1.1332e-09
VIP	-1.16986	1.13399e-09
APOA1	-1.15942	1.14715e-09
MFSD13A	-1.13726	1.15811e-09
PREX1	-1.10434	1.1662e-09
TMEM98	1.12443	1.1662e-09
KCNS2	1.17915	1.1766e-09
MAP3K11	-1.12635	1.17734e-09
SEC22C	-1.13644	1.18712e-09
HHIP	-1.14312	1.1946e-09
RHOV	1.17156	1.19606e-09
FIBCD1	-1.12129	1.2004e-09
FRY	-1.12849	1.20282e-09
B4GALNT4	1.14822	1.2053e-09
RASIP1	-1.14166	1.2069e-09
IL11	1.16155	1.22589e-09
DES	1.15761	1.22589e-09
SOX13	-1.14187	1.23932e-09
VAMP5	-1.12794	1.26694e-09
CAV2	-1.14367	1.27532e-09
VSIG1	1.19083	1.27594e-09
SLC6A4	-1.17726	1.28052e-09
TFPI	-1.12108	1.2938e-09
BARX2	1.12945	1.30601e-09
FDXR	1.10549	1.30743e-09
LRRC55	1.17249	1.31403e-09
DACH1	-1.1488	1.3141e-09
PPP2R2C	1.13072	1.34551e-09
DLG2	1.14109	1.36422e-09
SPOCK2	-1.13729	1.38103e-09
TCTN3	1.11384	1.38893e-09
SSR4	1.17668	1.40152e-09
DLL4	-1.14091	1.40606e-09
FOXE1	1.13068	1.4118e-09
GPSM1	-1.15807	1.4118e-09
IGLL5	1.15855	1.43016e-09
ALPK2	1.15525	1.43016e-09
FCRL5	1.1659	1.43343e-09
SYNDIG1	1.14252	1.43456e-09
GJB3	1.15638	1.46354e-09
GNAL	1.13683	1.46485e-09
ARHGAP40	1.14912	1.47312e-09
NOS2	-1.1278	1.48817e-09
NKAIN4	1.15035	1.49e-09
HTR3C	-1.16609	1.50989e-09
PMEPA1	1.14872	1.50989e-09
SLCO1B3	1.11657	1.53613e-09
PRUNE2	1.12826	1.55325e-09
ARTN	1.15931	1.55519e-09
PCSK9	-1.1338	1.56957e-09
SHOX2	1.1724	1.58329e-09
SERINC2	1.1386	1.59111e-09
LINC01781	1.16661	1.5964e-09
SOSTDC1	-1.16208	1.60051e-09
CFLAR	-1.13193	1.63232e-09
GYPC	-1.09673	1.66379e-09
TSPAN12	-1.13549	1.68148e-09
PNOC	1.1488	1.69164e-09
FAM189A1	-1.16385	1.75877e-09
MYO7B	-1.157	1.76972e-09
AMOTL2	-1.14043	1.77852e-09
PLEKHA4	1.13227	1.82536e-09
LINC01013	1.14094	1.82536e-09
FOXP3	1.15689	1.83445e-09
CPXM1	1.13406	1.86536e-09
LINC00487	-1.16058	1.90809e-09
FAM13A-AS1	-1.15289	1.92501e-09
PHACTR2	-1.1374	1.9326e-09
IGFBP7	1.11689	1.93558e-09
LINC02783	1.05816	1.93888e-09
SH2D1B	-1.1416	1.95101e-09
CC2D1B	-1.12069	1.97769e-09
PALD1	-1.11529	1.99342e-09
HIRIP3	-1.12609	2.00147e-09
TNS2	-1.13443	2.00217e-09
AKTIP	-1.13626	2.0104e-09
FOXI2	1.10329	2.04e-09
IL17RD	1.12821	2.04034e-09
POGK	-1.1181	2.05083e-09
SPDEF	1.11835	2.0667e-09
WNT7A	-1.1225	2.06691e-09
SLC39A6	1.11763	2.1403e-09
TP53BP1	1.11354	2.15328e-09
PCAT6	1.11362	2.1578e-09
CCK	-1.12033	2.23693e-09
PPP1R14B-AS1	1.13674	2.24499e-09
CLEC1A	-1.10885	2.25134e-09
LPIN2	-1.10977	2.26826e-09
NDP	1.15011	2.27666e-09
TMED3	1.11666	2.32218e-09
PSD	1.11018	2.3368e-09
PLS3-AS1	-1.14516	2.35239e-09
BMP7	1.1526	2.36104e-09
KANSL3	-1.14983	2.38144e-09
SHANK1	1.13131	2.38386e-09
VWA1	1.14083	2.41549e-09
SEC14L1	-1.10852	2.43364e-09
ENAH	1.11591	2.44977e-09
SSH2	-1.10359	2.45175e-09
JDP2	-1.12677	2.4689e-09
ITSN2	-1.10281	2.51643e-09
HMGA2	1.12809	2.52573e-09
MVB12B	-1.11573	2.54358e-09
CRTC2	-1.10144	2.54622e-09
LRRC32	-1.11351	2.57948e-09
LINC02861	-1.14067	2.5942e-09
RNF38	-1.11609	2.66887e-09
ST8SIA6	-1.12891	2.69737e-09
TRIM10	-1.11266	2.70881e-09
GPR37	1.1281	2.74401e-09
HNF4G	1.11205	2.77762e-09
TPH2	-1.13132	2.78757e-09
ALPG	-1.13359	2.79853e-09
ACKR4	-1.17094	2.84873e-09
GFOD1	-1.14023	2.85713e-09
CST5	1.11338	2.86313e-09
ADAMTSL3	-1.12714	2.91271e-09
ABTB1	-1.13246	2.92201e-09
SCMH1	-1.12447	2.99181e-09
FAM171B	1.12824	3.00201e-09
ERN2	1.11644	3.00652e-09
ITM2C	1.118	3.02284e-09
AOC3	-1.11586	3.03222e-09
WNT4	1.09626	3.05708e-09
PCDH19	1.12434	3.06316e-09
MYCT1	-1.13397	3.07545e-09
PTPRG	-1.11212	3.09213e-09
PKDCC	-1.12575	3.09869e-09
ADCY8	-1.12174	3.16279e-09
ARNT	-1.11135	3.16279e-09
TMEM245	-1.11491	3.17035e-09
TRPV4	1.10517	3.20124e-09
ASTN2	1.10197	3.2053e-09
FOXF1	-1.1178	3.20551e-09
SCG2	1.11086	3.22946e-09
CCM2L	-1.13031	3.23212e-09
OSBPL1A	-1.09487	3.26812e-09
TNFRSF19	1.0934	3.27464e-09
ACVR1	1.09316	3.28906e-09
LINC00472	-1.12961	3.29815e-09
IGFBP4	1.11953	3.30923e-09
CXCL6	1.14206	3.3183e-09
C12orf75	1.10252	3.34337e-09
SRGAP2	-1.12438	3.35521e-09
SP2	-1.09156	3.37292e-09
SLC48A1	-1.11004	3.43333e-09
NUPR1	-1.09762	3.5258e-09
RIMS4	-1.13385	3.58326e-09
HERPUD2	-1.11006	3.59739e-09
CCDC136	1.10693	3.6265e-09
NCR1	-1.11091	3.65129e-09
GJB5	1.1204	3.66184e-09
CASQ1	1.12693	3.69611e-09
FZD8	-1.12737	3.70427e-09
COL24A1	1.11937	3.78753e-09
PFKP	1.11938	3.81153e-09
FANCC	-1.10986	3.8337e-09
IL15RA	-1.07945	3.87185e-09
GPT2	1.1045	3.9357e-09
PHYHIPL	1.1072	3.97067e-09
DRD2	1.11771	3.9759e-09
LGALS7	1.12689	4.0054e-09
IGFBP5	1.1145	4.03112e-09
FAM83F	1.11131	4.03592e-09
DOCK6	-1.11283	4.03985e-09
PPP1R21	-1.11607	4.06259e-09
ACOXL	-1.0871	4.06941e-09
KHDRBS2	-1.10632	4.08573e-09
FCRLA	1.14222	4.08573e-09
SECISBP2	-1.13381	4.08751e-09
TRIM24	-1.10097	4.10439e-09
KIF7	1.10557	4.10673e-09
GPHA2	1.12054	4.10766e-09
FBXO32	1.11726	4.13011e-09
MOAP1	-1.09794	4.14871e-09
ADRB1	-1.12896	4.17928e-09
TCF21	-1.09459	4.23064e-09
KCNH1	1.13415	4.25543e-09
AHNAK2	1.09359	4.28177e-09
NXF3	-1.15014	4.28268e-09
MKRN2OS	1.09468	4.28268e-09
CHEK2	1.10971	4.32222e-09
CXCL12	1.10772	4.33102e-09
TAOK2	-1.1177	4.34323e-09
SLAIN1	-1.09749	4.50601e-09
TNFRSF18	1.14252	4.51323e-09
FZD3	1.10697	4.54332e-09
GLI1	1.11823	4.5627e-09
SCARF1	-1.0976	4.56765e-09
ANKRD40	-1.09433	4.58358e-09
RBM17	-1.11819	4.62768e-09
LINC01996	-1.12491	4.62929e-09
SLC44A2	-1.10473	4.69759e-09
CLDN5	-1.10976	4.71506e-09
ASB5	1.11007	4.80541e-09
SLC38A11	1.12776	4.86209e-09
PCSK1	1.13463	4.8944e-09
NIM1K	-1.11066	4.90595e-09
SLC18B1	1.08169	4.90952e-09
PPAT	1.11474	4.93187e-09
UPK1B	1.11557	4.94452e-09
SLC29A4	1.09112	5.04175e-09
PECAM1	-1.09679	5.13948e-09
CLIC2	-1.07611	5.14545e-09
CHCHD7	-1.08924	5.17294e-09
CLDN18	-1.11281	5.19918e-09
CDCP1	1.09538	5.23262e-09
DPEP1	1.1182	5.2647e-09
FAM169A	1.09727	5.26869e-09
SLC1A1	-1.09536	5.27435e-09
PFN2	1.08984	5.29309e-09
PNCK	1.11459	5.30485e-09
KDR	-1.10548	5.35618e-09
SNCAIP	1.09275	5.3617e-09
ZFYVE9	-1.10335	5.4015e-09
FAM107A	-1.10993	5.40758e-09
ACAN	1.14174	5.4683e-09
MELTF	1.13042	5.59023e-09
TIE1	-1.09914	5.68724e-09
ADRA1D	-1.10694	5.68856e-09
GRM8	-1.12127	5.70515e-09
PC	1.12342	5.7378e-09
NHEJ1	-1.08168	5.74937e-09
RECK	-1.09072	5.75159e-09
TTPA	-1.14313	5.77203e-09
RASSF1	-1.08771	5.83119e-09
ATP8A1	-1.08835	5.856e-09
FLT4	-1.10274	6.14414e-09
HAL	-1.10217	6.16472e-09
RIPPLY3	-1.12689	6.17977e-09
PPIC	1.08927	6.19979e-09
KCNMA1	1.12112	6.21161e-09
ING3	-1.10599	6.22002e-09
PADI3	1.04052	6.24568e-09
CTNNA3	1.10305	6.26038e-09
SIX1	1.10448	6.28524e-09
ANKRD29	-1.10983	6.35423e-09
NKD1	-1.0993	6.40035e-09
KLRD1	-1.13232	6.40425e-09
PHYHIP	1.09941	6.47359e-09
S100B	1.11318	6.47667e-09
WLS	1.07513	6.48403e-09
C4A	1.11791	6.50273e-09
CDO1	-1.11001	6.54279e-09
SYNPO2	1.09893	6.54531e-09
SLC27A3	-1.10007	6.61043e-09
NET1	1.08623	6.62713e-09
ANKRD36BP2	1.11635	6.69653e-09
SEMA3C	1.08342	6.70541e-09
DAPL1	1.09915	6.84212e-09
GHRHR	-1.08946	6.87893e-09
FMO1	1.07813	6.99032e-09
CTXND1	-1.12121	7.04524e-09
QDPR	-1.0713	7.05245e-09
IL22RA2	1.09388	7.0744e-09
FCHSD2	-1.06489	7.08718e-09
HOPX	-1.08971	7.08923e-09
CRYM	1.0783	7.08945e-09
ATP12A	1.10424	7.10732e-09
ROBO4	-1.09452	7.13568e-09
MPIG6B	-1.11841	7.16107e-09
TAMALIN	-1.10293	7.25387e-09
LINC01169	-1.11449	7.3265e-09
TARID	-1.09221	7.38494e-09
DQX1	1.09563	7.38494e-09
ANO6	-1.077	7.39965e-09
STEAP2	1.11484	7.46434e-09
CELSR2	1.07865	7.48181e-09
NAALADL2	1.07444	7.49964e-09
NKAPL	-1.10508	7.5649e-09
LRRC3	-1.08759	7.65012e-09
ECEL1	1.11592	7.74032e-09
PPM1D	-1.10583	7.77266e-09
TRIM71	-1.10125	7.83633e-09
SYT15-AS1	-1.10417	7.90606e-09
EPN3	1.08334	7.91402e-09
BUD13	-1.08324	8.01608e-09
SYDE2	-1.0933	8.15184e-09
ELOVL2	1.12376	8.22713e-09
FXYD4	-1.093	8.23489e-09
UNC5D	-1.09902	8.2591e-09
PPIP5K1	1.07698	8.30024e-09
MYO9A	-1.08341	8.32094e-09
SLC14A1	-1.12513	8.32802e-09
RILP	-1.08445	8.35761e-09
TRIM58	-1.10486	8.46236e-09
SERPINB6	-1.09719	8.49285e-09
CHRNA2	-1.12825	8.52366e-09
CERCAM	1.07949	8.7017e-09
KERA	1.08689	8.78025e-09
DPYS	1.08941	8.86854e-09
CHST8	1.09675	8.88094e-09
SLC5A5	1.12611	9.0282e-09
FENDRR	-1.10207	9.03209e-09
TSHR	1.10411	9.11472e-09
ERICH4	-1.11266	9.11472e-09
LXN	1.08188	9.19325e-09
NCCRP1	1.11991	9.20064e-09
SLC2A5	1.10421	9.37174e-09
PAM	1.0896	9.42149e-09
CRACD	1.08154	9.43236e-09
INPP5A	-1.09394	9.45871e-09
TLL2	1.11318	9.53641e-09
BEX1	-1.11373	9.53641e-09
PDE1A	1.07512	9.76146e-09
CDKL5	-1.06599	9.76308e-09
LARGE2	1.08606	9.79221e-09
CTDSP1	-1.07374	9.81791e-09
RAMP1	1.10093	9.84436e-09
ELP4	-1.08461	9.88555e-09
CAPN6	1.08795	9.89164e-09
SDC1	1.08248	9.98735e-09
BCL2L2	-1.08998	1.0032e-08
PRKCZ	-1.07768	1.00735e-08
ZPLD1	1.09328	1.0104e-08
SHROOM2	-1.07992	1.02799e-08
TXNDC5	1.12038	1.03154e-08
INF2	-1.07904	1.03537e-08
GALK1	-1.05244	1.0482e-08
CBLC	1.08106	1.05278e-08
TGFB3	1.07925	1.06408e-08
RAMP2	-1.10113	1.06602e-08
CR2	1.12132	1.06986e-08
KCNS1	-1.07624	1.07843e-08
UTP25	1.07017	1.08618e-08
GATA3	-1.09347	1.10357e-08
CNTNAP2	1.09844	1.13422e-08
MB	1.06648	1.13958e-08
FMNL2	-1.06453	1.15e-08
PIM2	1.11293	1.15427e-08
ANGPTL7	-1.0982	1.15999e-08
ARFGAP2	-1.07462	1.16458e-08
SYTL1	1.0669	1.16643e-08
FHOD1	-1.09245	1.18233e-08
STARD9	-1.08802	1.18674e-08
CLCN6	-1.09248	1.20964e-08
BCL2L15	1.09297	1.21428e-08
KLF7	-1.06691	1.21877e-08
GORASP1	-1.10155	1.22881e-08
LINC01303	1.09606	1.24644e-08
GLT8D2	1.05598	1.24793e-08
IZUMO1	-1.11043	1.25934e-08
NFATC4	1.07873	1.26021e-08
CD27	1.09215	1.28143e-08
KAT8	-1.08457	1.29211e-08
KIR2DL3	-1.09223	1.29533e-08
PI15	1.08995	1.30237e-08
ASPHD2	1.07633	1.31897e-08
SLC10A4	-1.10908	1.32219e-08
PAX9	1.06328	1.32582e-08
GADL1	1.10924	1.32697e-08
MAGED1	1.07168	1.34842e-08
ABCC3	1.09262	1.37402e-08
ADRA1B	-1.07759	1.37432e-08
DGKA	1.08668	1.37449e-08
IDH3B	-1.05814	1.3942e-08
VSTM2L	1.08474	1.3957e-08
PPP1R13B	-1.06773	1.41047e-08
CLEC4E	-1.05792	1.4188e-08
GIMAP1	-1.08509	1.43743e-08
BDKRB1	1.11506	1.43771e-08
GRIN2A	1.09567	1.44232e-08
KIF17	-1.08175	1.44708e-08
SLC22A15	-1.0788	1.45105e-08
CFL2	-1.07477	1.45499e-08
RHBDL3	1.09651	1.45573e-08
FAXDC2	-1.07904	1.46048e-08
KCTD11	1.05892	1.49384e-08
TENT5C	1.09139	1.49587e-08
HEY1	-1.09873	1.50174e-08
LINC00551	-1.09739	1.50248e-08
LYPD3	1.08367	1.50345e-08
FAM30A	1.09028	1.52009e-08
SHANK3	-1.0784	1.53801e-08
ADIRF	-1.06927	1.53801e-08
LINC01091	1.06658	1.55401e-08
TRIOBP	-1.06219	1.55401e-08
MUCL3	-1.07577	1.56063e-08
CCL13	1.08296	1.56514e-08
CLCA4	1.07868	1.59573e-08
SRGAP2C	-1.0896	1.59757e-08
KIAA0040	-1.04718	1.60111e-08
DNAAF2	1.06366	1.61173e-08
RAPGEF4	-1.06125	1.62314e-08
IGFBPL1	1.07728	1.62503e-08
CTDSP2	-1.07882	1.6266e-08
COL4A6	1.07531	1.64037e-08
RAET1E	1.04381	1.64069e-08
KIR3DL1	-1.08899	1.65127e-08
S1PR3	1.0949	1.66149e-08
AFTPH-DT	1.07241	1.66332e-08
SH3GL2	-1.09718	1.68744e-08
GPX8	1.04923	1.70667e-08
XDH	1.0724	1.70817e-08
IMPA2	-1.06131	1.71152e-08
HECW2	-1.0763	1.71688e-08
CD79A	1.10011	1.7263e-08
CD300LG	-1.09018	1.73642e-08
DIPK1B	-1.07853	1.74799e-08
UVRAG	-1.05793	1.76574e-08
ALDH3B2	1.06219	1.76605e-08
MGLL	-1.05748	1.79065e-08
LINC00582	1.07888	1.80769e-08
BAZ2A	-1.05493	1.80878e-08
SULT1C4	-1.05702	1.80915e-08
SCN1A	-1.05253	1.82765e-08
IRS2	-1.09031	1.8321e-08
CLNK	1.08357	1.83575e-08
RUNX2	1.08383	1.84256e-08
OTUD1	-1.09668	1.85537e-08
ZSCAN4	1.07293	1.8864e-08
JPH1	-1.06846	1.90449e-08
SPATA18	1.05466	1.90818e-08
CLDN14	1.08139	1.90939e-08
LILRA1	-1.05967	1.92545e-08
CDHR2	1.08411	1.95752e-08
BIK	1.05789	1.97213e-08
GPBAR1	-1.06941	1.97902e-08
PMCH	1.07398	1.99508e-08
ITPRIPL1	1.07494	2.00556e-08
CAMP	-1.07221	2.0122e-08
FDPS	-1.06927	2.07007e-08
LMTK2	-1.06658	2.0718e-08
SNX24	-1.05578	2.07424e-08
HLA-DOB	1.07907	2.07674e-08
GPX2	1.09326	2.08167e-08
FOXL1	1.07775	2.10111e-08
TMEM97	-1.05961	2.11339e-08
FMO5	-1.06151	2.11947e-08
JCHAIN	1.08433	2.12424e-08
ITGA7	1.07471	2.12648e-08
OSTF1	-1.01801	2.13883e-08
ZFP69B	1.07637	2.14208e-08
EGFLAM	1.07174	2.17451e-08
N4BP2L1	-1.0695	2.19108e-08
KCNK3	-1.06548	2.19914e-08
GSTA1	1.05895	2.20522e-08
TSPAN1	1.05546	2.22961e-08
CASC3	-1.06127	2.27203e-08
ZDHHC19	-1.06963	2.28136e-08
SHISA8	1.07265	2.28644e-08
KIDINS220	-1.04667	2.29871e-08
TSKU	1.05487	2.30803e-08
TUFT1	-1.07515	2.32077e-08
MYOF	1.067	2.32471e-08
SGF29	-1.06836	2.3287e-08
CAMK1D	1.07063	2.33139e-08
IL31RA	1.0807	2.33383e-08
ADD1	-1.06628	2.35429e-08
FGFBP2	-1.11023	2.35814e-08
BTBD11	1.06828	2.36222e-08
WFDC2	1.07042	2.3652e-08
SULT1A2	-1.06874	2.38182e-08
NRXN2	1.04655	2.406e-08
PALS1	-1.0692	2.41042e-08
WHRN	1.06257	2.41064e-08
MPPE1	-1.07102	2.4173e-08
VAMP4	-1.07321	2.42528e-08
SERPINE2	1.05586	2.43209e-08
ESPN	1.05508	2.46671e-08
TDRD10	-1.0672	2.4807e-08
CAV3	-1.07881	2.48533e-08
PRR7	1.07832	2.49673e-08
TSPAN13	-1.0519	2.4988e-08
SERPINI1	1.06348	2.51175e-08
BNC2	1.05538	2.53011e-08
PTGES3L-AARSD1	1.0717	2.53387e-08
AGAP1-IT1	-1.09689	2.54425e-08
SEMA5A	-1.05597	2.55716e-08
FANCE	-1.05466	2.56127e-08
ARHGAP45	-1.03933	2.58243e-08
PAPPA	1.06375	2.58504e-08
APTR	-1.06574	2.59748e-08
PLA2G1B	-1.07112	2.61006e-08
HMSD	-1.0654	2.62206e-08
CTNND1	-1.06299	2.62588e-08
INO80	-1.04179	2.6364e-08
ZBED2	-1.07087	2.66236e-08
OLAH	-1.09439	2.66413e-08
ADAM28	1.06301	2.69746e-08
SMAD7	-1.06098	2.78956e-08
CUX2	1.05543	2.79005e-08
SCUBE3	1.06772	2.79424e-08
CLU	1.06462	2.83437e-08
THSD1	-1.0599	2.84157e-08
HCN4	1.0493	2.88757e-08
SCN7A	-1.05127	2.89076e-08
SPRING1	-1.03889	2.89638e-08
AZIN2	1.04217	2.92982e-08
FAIM	1.03879	2.9401e-08
CBLN4	1.07373	2.9849e-08
FRMD3	-1.07873	2.99407e-08
DPYSL3	1.0548	3.03923e-08
CNTROB	-1.06336	3.03946e-08
SMIM31	1.07528	3.05762e-08
ZNF592	-1.05	3.06203e-08
DNM3	-1.04645	3.0689e-08
LURAP1L	-1.02117	3.0696e-08
CCR8	1.07066	3.0731e-08
GALNT6	1.04381	3.08165e-08
NRN1L	-1.07967	3.09167e-08
PGLYRP4	1.07094	3.15105e-08
SLC30A1	1.04418	3.15105e-08
COL18A1	1.05907	3.17758e-08
PRAMENP	1.0747	3.17936e-08
PDLIM2	-1.05605	3.2151e-08
KCNN3	1.04612	3.22824e-08
C16orf74	1.06174	3.26658e-08
SFXN1	1.04908	3.28426e-08
TMIE	-1.07324	3.29628e-08
ADCY2	1.04777	3.33976e-08
NCOA1	-1.03575	3.35348e-08
SIX2	1.034	3.36358e-08
PIGU	1.03012	3.40653e-08
C13orf46	-1.06071	3.41438e-08
VEPH1	-1.04827	3.42654e-08
TMC2	-1.07947	3.44444e-08
GDF15	1.06529	3.4604e-08
GALNT1	1.03807	3.46463e-08
CHL1	1.0649	3.47129e-08
CMPK2	-1.0615	3.47188e-08
MTRR	-1.0543	3.47599e-08
MUC5B	1.06886	3.52266e-08
GMDS	1.06463	3.55805e-08
CITED2	-1.05379	3.58547e-08
LHCGR	1.04857	3.6302e-08
SLC10A6	1.05613	3.65461e-08
VANGL1	1.01979	3.65467e-08
FGD4	-1.03843	3.71891e-08
TBX3	-1.05539	3.78875e-08
GATA2	-1.05082	3.81434e-08
CGNL1	-1.05531	3.81608e-08
CLEC1B	-1.05329	3.84628e-08
CLIC3	-1.04887	3.87879e-08
COL1A2	1.03047	3.90177e-08
SCAI	-1.04932	3.94645e-08
CBFA2T3	-1.03953	3.95286e-08
GIMAP4	-1.04145	3.95826e-08
MYORG	1.03038	3.99008e-08
CEL	1.05385	4.01467e-08
GNG4	1.07512	4.06015e-08
STYK1	1.03334	4.06136e-08
ZNF22	-1.03314	4.10588e-08
TMIGD2	-1.04336	4.12148e-08
SERPINB4	1.02975	4.15477e-08
AGRP	-1.06493	4.16124e-08
BCAS4	1.02456	4.18712e-08
HACE1	-1.04593	4.24149e-08
GAB3	-1.03599	4.28269e-08
TUBB1	-1.08496	4.29755e-08
CHIAP2	-1.07044	4.30272e-08
UBD	1.06373	4.32998e-08
BCL11A	1.05127	4.35242e-08
MUC4	1.06827	4.355e-08
MARK3	-1.07492	4.38286e-08
DCXR	-1.04017	4.4511e-08
VAT1L	1.04836	4.45478e-08
UXS1	-1.03609	4.45798e-08
LDHD	-1.04846	4.47967e-08
EFNA4	1.04874	4.49261e-08
MYBPC2	1.07534	4.50242e-08
BLACAT1	1.05067	4.52006e-08
GIMAP5	-1.03506	4.55655e-08
RFC1	-1.042	4.58128e-08
PLAU	1.04303	4.58963e-08
LAMA3	-1.02766	4.60955e-08
C1orf167	-1.0431	4.6188e-08
PAG1	-1.01225	4.62194e-08
FAM102A	1.01935	4.62194e-08
TRIP10	-1.04791	4.62848e-08
PREX2	-1.03299	4.66513e-08
ICAM2	-1.03262	4.68316e-08
CORO6	-1.07081	4.71009e-08
COBLL1	-1.01756	4.71252e-08
LINC01235	1.07114	4.74498e-08
TMEM87A	-1.01831	4.74932e-08
DENR	0.992063	4.77206e-08
BTC	1.02881	4.81794e-08
OBSCN	-1.04584	4.84007e-08
SORT1	-1.03229	4.85906e-08
AFMID	-1.06363	4.86912e-08
SHISAL2B	1.03238	4.93452e-08
PELI2	-1.05316	4.95007e-08
BDNF	-1.05518	4.95645e-08
PERM1	1.06428	4.99094e-08
SOX9	1.06004	4.9912e-08
SULF2	1.04539	5.01098e-08
CYP17A1	-1.08136	5.05651e-08
PITPNM1	1.02136	5.06728e-08
HMGCS1	-1.04946	5.09123e-08
SLC27A2	1.03162	5.19388e-08
FASN	-1.03375	5.22514e-08
CCDC80	1.03499	5.266e-08
USP53	-1.04438	5.28693e-08
ANKS1A	-1.04326	5.31114e-08
TLR3	-1.03301	5.32445e-08
ZNF541	-1.05621	5.34376e-08
BMERB1	1.02478	5.39398e-08
ZC3H7A	-1.0468	5.39679e-08
TTC3	1.02809	5.39786e-08
MIXL1	1.06811	5.45058e-08
GBP6	1.03447	5.50016e-08
SLC35B4	1.02878	5.52386e-08
ST7	-1.02702	5.52849e-08
TMEM139	-1.03192	5.54092e-08
RGS9	-1.0548	5.70396e-08
GTPBP6	-1.054	5.72563e-08
SPRY4	-1.03409	5.78347e-08
R3HDML	1.03434	5.85918e-08
C1orf74	1.05746	5.87471e-08
B3GNT8	-1.02594	5.87567e-08
S100A3	-1.04415	5.87815e-08
RBP2	-1.04704	5.94626e-08
FXYD6	-1.03456	5.94724e-08
LRCH4	-1.0312	6.03301e-08
LINC00494	1.04371	6.09647e-08
MAPK14	-1.0238	6.11789e-08
GGT6	1.01716	6.1881e-08
SGMS1	-1.03144	6.19742e-08
ARHGEF11	-1.02447	6.20233e-08
GHR	-1.03872	6.28148e-08
GRIP1	1.02364	6.37239e-08
RBM38	1.02404	6.41072e-08
CD19	1.0769	6.4534e-08
CASP3	1.02839	6.46931e-08
LIMD1	-1.03174	6.49501e-08
SPRED3	1.04816	6.5784e-08
LINC02829	1.04208	6.62017e-08
BPIFB1	1.05168	6.63226e-08
P3H3	1.0337	6.72699e-08
CCR7	1.04941	6.7423e-08
RAB17	-1.03705	6.76619e-08
TM4SF1-AS1	1.02929	6.78022e-08
ACR	-1.05634	6.81986e-08
RAMP2-AS1	-1.06119	6.83234e-08
PROM1	1.03277	6.83802e-08
ANKRD1	-1.03476	6.88358e-08
EPHX3	1.02402	6.9173e-08
PRR5	1.05423	6.91808e-08
PRRX2	1.0386	6.94487e-08
GSAP	-1.0278	6.95958e-08
DTX2	1.04183	6.9829e-08
SRGAP2B	-1.0429	7.08942e-08
B4GALT4	1.03575	7.10027e-08
KCNA2	1.04976	7.19032e-08
PHF2	-1.02241	7.22327e-08
RPL39L	1.0148	7.31546e-08
TACR1	1.04387	7.34986e-08
SLAMF9	1.04919	7.36684e-08
PAPPA2	1.05536	7.39003e-08
SLFNL1	-1.04758	7.40474e-08
DUSP8	-1.04563	7.44018e-08
C3orf70	1.03697	7.46796e-08
CYP2S1	1.02239	7.52247e-08
SULT1A1	-1.06723	7.60774e-08
GXYLT1	-1.01878	7.69258e-08
IL17REL	1.04691	7.69526e-08
PRKCH	-1.00164	7.70297e-08
FBLN5	-1.03235	7.72359e-08
BHLHE22-AS1	1.0434	7.72653e-08
NCAM1	1.03841	7.74131e-08
CXorf38	-1.01442	7.78932e-08
NOSTRIN	-1.03258	7.82077e-08
RAB6A	-1.00687	7.87281e-08
CD5L	-1.04773	7.88865e-08
NFYC	-1.00755	7.89975e-08
OSGIN1	-1.03761	7.917e-08
CCNY	-1.0188	7.92042e-08
WFS1	-1.03089	7.97822e-08
COL16A1	1.02745	8.00565e-08
FOLR3	-1.02611	8.00786e-08
JSRP1	1.07591	8.04042e-08
STX12	-1.00921	8.10403e-08
CYP1A2	-1.05452	8.10795e-08
MED20	0.997074	8.15565e-08
HEBP1	-0.988716	8.19998e-08
ROR2	1.02561	8.2249e-08
PIK3CD-AS2	1.04517	8.33346e-08
WNT5B	1.01406	8.40952e-08
IL18RAP	-1.01414	8.53792e-08
HPS5	-1.02666	8.55835e-08
RILPL2	-1.00899	8.73221e-08
RAP1A	-0.987885	8.78616e-08
ITGAV	1.02194	8.80918e-08
MIR1915HG	0.998942	8.85579e-08
ARHGEF2	-1.03511	8.96013e-08
MAP3K9-DT	1.0096	9.02891e-08
FEZF1-AS1	1.0339	9.08034e-08
SESN3	1.02096	9.08467e-08
PRRT3	1.01251	9.23809e-08
ADCYAP1	1.0505	9.24909e-08
SH3PXD2A	1.01825	9.38745e-08
ST14	1.0238	9.38745e-08
SPOCK3	1.02438	9.43255e-08
SCAPER	-1.01028	9.43362e-08
PABIR3	-1.04255	9.44359e-08
TNFRSF17	1.04289	9.54121e-08
PRPSAP1	-1.02955	9.57086e-08
CLEC11A	1.01484	9.59175e-08
CMTM8	-1.01662	9.60697e-08
ADH1B	-1.00671	9.77083e-08
SH3GL3	-1.0471	9.84751e-08
PACRG-AS3	-1.0291	9.89751e-08
ERICH5	1.00474	9.942e-08
ERC2	1.03108	9.98265e-08
CLDN16	1.01294	1.00413e-07
BNIP3	-1.04153	1.00676e-07
BICC1	1.00547	1.0099e-07
PTCRA	-1.02014	1.01099e-07
PIEZO1	-1.0124	1.02454e-07
AOC2	-1.04137	1.03315e-07
MARCHF4	0.999593	1.03584e-07
ACER2	1.0145	1.03839e-07
PTGES	1.02898	1.04616e-07
EML6	1.02962	1.05946e-07
SFTA2	-1.00269	1.06763e-07
ZNF551	1.03431	1.07246e-07
ADGRB3	-1.00845	1.07587e-07
TMEM38A	-1.0358	1.07639e-07
VAMP2	-1.02538	1.08182e-07
BCAP29	-1.01468	1.09367e-07
NPTX2	1.03205	1.09726e-07
NBEA	1.00139	1.09803e-07
CHPF	1.01179	1.09898e-07
LMO2	-1.04147	1.10012e-07
RBCK1	-1.01617	1.13485e-07
BLVRB	-0.99773	1.14077e-07
TMEM18	-1.00396	1.14315e-07
PRKG2	-1.02655	1.14553e-07
TSPAN6	1.00648	1.14928e-07
LINC00622	-1.04304	1.15051e-07
SEC14L4	-1.01683	1.15352e-07
TPPP3	0.993966	1.1556e-07
SGPL1	0.991008	1.16497e-07
RGMA	1.02415	1.18126e-07
AQP6	1.02215	1.18275e-07
ASRGL1	-1.00794	1.18391e-07
CCDC92	-1.02048	1.18652e-07
NETO1	1.0326	1.18988e-07
SLITRK2	-1.06005	1.19458e-07
N4BP3	-1.03326	1.19471e-07
MAPK4	-1.01768	1.2018e-07
EFHC2	1.00291	1.20339e-07
CTXN1	1.00678	1.20399e-07
MPC1	-1.00494	1.21867e-07
LINC01082	-1.0349	1.22343e-07
CHODL	1.03366	1.23449e-07
ADH7	1.00305	1.23896e-07
IL18R1	-1.00312	1.25921e-07
RALA	-1.00725	1.26228e-07
TRAF3	1.00451	1.26534e-07
CADM4	1.00135	1.26621e-07
DLG5	0.998688	1.26728e-07
CARMIL1	-1.01475	1.274e-07
LINC00511	1.02693	1.28017e-07
TBC1D20	-1.03105	1.28055e-07
AHNAK	-1.00915	1.28486e-07
E2F8	0.989941	1.28715e-07
WWP2	-1.00689	1.29096e-07
OBSCN-AS1	-1.0294	1.29725e-07
MUC20	1.01706	1.29788e-07
NINJ2	-1.00934	1.29953e-07
SRGAP3	0.991522	1.30299e-07
AVPR1A	1.00633	1.30881e-07
CLDN10	1.03022	1.31483e-07
MYOSLID	1.02246	1.32896e-07
SMAD6	-1.02716	1.33127e-07
MUC16	1.01311	1.34207e-07
ITGA10	-1.01618	1.34819e-07
SHC4	0.998407	1.34822e-07
SETD3	-0.997895	1.3498e-07
CFAP20DC	1.00132	1.3498e-07
SACM1L	-1.01288	1.35337e-07
LGALSL	-1.01697	1.35633e-07
NDRG2	-1.0224	1.36576e-07
S100A4	-0.989932	1.39594e-07
TENT5B	-1.00484	1.39874e-07
SIRT2	-1.01239	1.39966e-07
MEFV	-0.993044	1.4008e-07
SH3D19	-0.991961	1.40536e-07
HID1-AS1	-1.02517	1.4081e-07
RIMS2	1.03576	1.40873e-07
PRXL2A	0.989179	1.42265e-07
SBF2	-0.98145	1.4233e-07
C8orf82	-1.00389	1.42431e-07
UNC5CL	1.0386	1.42532e-07
GIT1	-0.996893	1.42896e-07
PRMT6	0.97715	1.44693e-07
IFI27	-1.03318	1.46691e-07
CTIF	-1.0057	1.47565e-07
PRPS2	0.997264	1.49137e-07
GCLC	1.02248	1.50064e-07
MEG3	1.00455	1.5242e-07
COL9A1	1.01261	1.53992e-07
HTT	-1.00269	1.57002e-07
SELENBP1	-0.995147	1.57227e-07
SREBF2	-0.995333	1.58124e-07
HAGLR	-1.00198	1.58401e-07
SPATA13	-1.00341	1.58819e-07
MYOM1	1.00325	1.59166e-07
RAF1	-0.993444	1.59622e-07
ANKRD65	0.972325	1.6039e-07
B3GALNT2	1.02167	1.61283e-07
SLC35A1	-1.00879	1.61628e-07
PCDHGB4	-1.02077	1.63206e-07
SNX27	-1.01191	1.63685e-07
GMFG	-0.977185	1.63752e-07
ADGRE1	-0.994703	1.64962e-07
RASSF8	-0.998414	1.66944e-07
KLHDC7A	0.978996	1.67325e-07
CLMP	1.0016	1.68501e-07
STX1A	1.01308	1.71275e-07
TRIM29	1.01173	1.72773e-07
FAM89A	-0.991465	1.73035e-07
CDH17	1.0355	1.73489e-07
RPP40	1.00066	1.74977e-07
SORD	1.00776	1.74985e-07
PCTP	-1.0033	1.75775e-07
CISD1	0.990696	1.77251e-07
KREMEN2	1.00662	1.77737e-07
HSPA12A	0.986952	1.78071e-07
LRP12	0.997393	1.7833e-07
RUNX1	0.992923	1.78482e-07
FAM98A	0.986185	1.79317e-07
TMEM184A	1.0121	1.79706e-07
RCOR1	-0.991966	1.80053e-07
ADGRF1	0.998177	1.80658e-07
PNRC2	-1.00117	1.81584e-07
SP6	-0.994515	1.81835e-07
JADE3	-0.982565	1.82318e-07
CDKN2D	-0.990108	1.83507e-07
BFSP1	-1.01266	1.83755e-07
C2orf68	-1.01382	1.84416e-07
GPC3	-1.00098	1.84607e-07
WWP1	-0.992639	1.8575e-07
QRICH2	-1.02767	1.86081e-07
ALOX12P2	1.01191	1.86503e-07
CDHR1	1.01333	1.87396e-07
IL7R	-0.996513	1.88385e-07
ATP8B5P	-1.0335	1.89604e-07
ERICH2-DT	-1.01743	1.91087e-07
BCAS1	0.99268	1.92617e-07
LRRC19	-1.03064	1.94005e-07
BRI3	-0.973664	1.95615e-07
STK39	0.999131	1.95615e-07
CAPN11	1.00072	1.96624e-07
CNN1	1.00538	1.97449e-07
BHLHA15	1.02431	1.99314e-07
ZC3H12C	-0.996387	2.01112e-07
FLI1	-0.983806	2.02497e-07
SLFN13	0.988271	2.02879e-07
PRKCE	-0.995219	2.03927e-07
ADAMTSL1	1.01258	2.04341e-07
TPRG1	-0.998123	2.05008e-07
HRK	1.00695	2.05801e-07
CASS4	-1.00138	2.05897e-07
HDAC5	-1.00967	2.07081e-07
FANK1	0.985277	2.08093e-07
GNMT	-1.0192	2.084e-07
SSTR2	1.02409	2.08598e-07
COLGALT2	-1.01616	2.0965e-07
ILRUN	-0.976796	2.10255e-07
USP13	-0.992273	2.10831e-07
SMIM43	1.01223	2.16489e-07
CASZ1	-0.999021	2.16534e-07
ESR2	1.02621	2.16698e-07
ZFAND2B	-0.988612	2.17567e-07
LINC02615	-1.03393	2.18846e-07
TAB2	-0.970725	2.21338e-07
ASPHD1	1.00577	2.22714e-07
TSPAN4	-0.993257	2.23288e-07
ZADH2	-0.998908	2.2373e-07
RBP5	1.02756	2.23827e-07
EZH1	-1.00793	2.25115e-07
CREBBP	-0.97469	2.25759e-07
EDARADD	0.984169	2.25961e-07
PRF1	-0.995772	2.26113e-07
ESM1	-0.99678	2.26706e-07
COL6A3	1.00022	2.27917e-07
SELENOW	0.982029	2.30485e-07
JPT2	0.994568	2.30938e-07
SYT8	1.00702	2.31175e-07
TNFRSF13C	1.0311	2.33282e-07
IP6K3	-1.01277	2.33612e-07
ADARB1	-1.01081	2.33908e-07
CCL21	1.00761	2.36442e-07
MROH2A	1.00165	2.38428e-07
FA2H	0.984541	2.40468e-07
HIP1	-0.992125	2.41814e-07
PROSER2	-0.988691	2.44257e-07
FAXC	0.986909	2.44343e-07
NKG7	-1.00422	2.47726e-07
PRKCQ	-0.971175	2.49896e-07
TDP1	0.978349	2.51505e-07
LMO7	-0.985654	2.51512e-07
SVOPL	0.98054	2.51592e-07
IL17RE	-0.98423	2.53573e-07
GPS2	-0.99183	2.5494e-07
SBDSP1	-0.992131	2.55815e-07
CXXC5	0.990766	2.55815e-07
PPP1R14C	0.977469	2.57477e-07
KCNF1	1.01532	2.57563e-07
VSNL1	1.00102	2.58214e-07
TMEM156	1.02019	2.58402e-07
FARP1	-0.979659	2.59744e-07
CDKL2	-0.986068	2.60631e-07
NR1H2	-0.963613	2.60984e-07
SFRP4	0.987125	2.62602e-07
LINC00092	-1.00412	2.6459e-07
MYOCD	1.00902	2.6459e-07
TFB2M	0.983019	2.6459e-07
MAML3	-0.98434	2.6506e-07
TGFBR3	-0.997422	2.66168e-07
UTRN	-0.970984	2.67069e-07
FKBP11	1.03453	2.67941e-07
ATP6V0A1	-0.984083	2.72691e-07
ETV1	-0.979499	2.73591e-07
FGD3	-0.974123	2.77143e-07
DAPK1	-0.982838	2.77556e-07
FZD10-AS1	0.99058	2.78118e-07
RAI2	-0.976316	2.84307e-07
USH1C	1.00713	2.84322e-07
DPYD	-0.971905	2.87463e-07
R3HDM2	-0.988548	2.88239e-07
CCDC184	0.98593	2.88731e-07
SLC24A4	-1.00012	2.88731e-07
IDI1	-0.983072	2.90229e-07
GPR146	-0.991317	2.91976e-07
CMTR1	-0.981261	2.92203e-07
PAK3	0.991219	2.9235e-07
HTRA1	0.958031	2.92491e-07
FKBP8	-0.967773	2.92737e-07
CNBD1	-0.976515	2.93754e-07
RMC1	-0.964682	2.93952e-07
NEDD4L	-0.982812	2.96894e-07
SERPINB3	0.996466	2.97126e-07
AQP3	0.985706	2.97509e-07
COLEC11	0.999018	2.97687e-07
PTGES3L	1.0043	3.00528e-07
ZNF620	-1.00135	3.00857e-07
CLSTN1	0.966705	3.01141e-07
RUVBL1	0.993573	3.01921e-07
WAC	-0.968443	3.02229e-07
IGSF1	0.992559	3.02286e-07
TSPAN18	-0.982018	3.05479e-07
USP2	0.97701	3.06341e-07
TOR3A	0.996575	3.06644e-07
CAPN13	0.990118	3.07507e-07
MCCC1	-0.978804	3.07782e-07
ITPK1	-0.970612	3.09073e-07
FHOD3	0.983658	3.10578e-07
DIRAS3	1.00083	3.12499e-07
ZDHHC14	-0.983275	3.13487e-07
ARHGEF1	-0.98135	3.13726e-07
PLXDC1	0.975027	3.15496e-07
HS6ST3	0.995596	3.15993e-07
PCNX2	0.981215	3.173e-07
ZNF503-AS1	-1.00165	3.18291e-07
PBXIP1	0.982531	3.18538e-07
NTRK1	1.00571	3.19324e-07
SERINC3	-0.975306	3.19701e-07
HSDL2	-0.983792	3.20374e-07
SPAG4	1.03452	3.26356e-07
TSEN15	-0.96453	3.27133e-07
ARL14	0.971224	3.28339e-07
ZNF154	1.01042	3.2846e-07
CNGA1	1.00915	3.28461e-07
CREB3L2	0.980642	3.28564e-07
CHID1	0.962454	3.31069e-07
SLC39A11	0.965608	3.33092e-07
FOXC1	0.994729	3.33362e-07
MGAT4A	-0.962433	3.35663e-07
ZBTB34	-0.970329	3.35844e-07
RCSD1	-0.975274	3.36735e-07
IFT43	0.978367	3.36906e-07
CDH26	0.963824	3.36963e-07
LOXL1	0.96633	3.37725e-07
STT3B	0.981444	3.37767e-07
SACS	0.996598	3.40376e-07
LURAP1	0.982724	3.40409e-07
RGS17	1.00303	3.41236e-07
GSK3B	-0.966999	3.41463e-07
ENTPD8	0.980154	3.43094e-07
BBS5	0.978085	3.45529e-07
AAMDC	-0.968897	3.46575e-07
SIRPD	-0.966625	3.53232e-07
USP44	-0.976067	3.53807e-07
CCL7	0.980945	3.55007e-07
RGN	-0.983301	3.56681e-07
C6orf223	-0.98887	3.57609e-07
TMEM41B	-0.998637	3.57799e-07
COL9A2	0.977175	3.61773e-07
TNC	0.966726	3.63273e-07
TRAF5	0.987852	3.6907e-07
RPGRIP1L	0.984079	3.69242e-07
TTC38	-1.01441	3.69256e-07
RMST	-0.973967	3.74251e-07
NBEAL2	-0.975145	3.74514e-07
POLDIP3	-0.990024	3.75314e-07
CD274	-0.951024	3.7633e-07
SDR16C5	-0.957432	3.78598e-07
FBXL22	0.960307	3.84968e-07
CADPS	1.00151	3.86017e-07
C1orf21	-0.97829	3.89577e-07
ZFP92	-0.975101	3.90307e-07
PHTF2	0.978218	3.9215e-07
ARID4A	-0.974947	3.95583e-07
GSKIP	0.971032	3.95821e-07
PLEKHS1	0.970258	3.97963e-07
THBS3	0.961925	3.98466e-07
SOX2	0.979546	3.98608e-07
KLF15	-1.00292	4.02144e-07
GABARAPL1	-0.968687	4.03725e-07
RNF207	0.969724	4.04082e-07
HRH1	0.995707	4.07892e-07
GBP4	-0.993136	4.20662e-07
TOMM34	0.972473	4.21364e-07
SYNJ1	-0.952091	4.21434e-07
LDB2	-0.973727	4.21561e-07
MLLT1	-0.970097	4.21855e-07
FZD4	-0.981739	4.21931e-07
TGFBI	0.966008	4.22166e-07
PPP1R26	-0.977474	4.22719e-07
GGT1	-0.973867	4.23577e-07
JAK2	-0.961133	4.25671e-07
ENPP5	0.94511	4.26792e-07
TRADD	0.964683	4.27929e-07
ENTPD7	0.957812	4.28398e-07
ALOX12	-0.992631	4.30066e-07
SYNPO2L	-0.987941	4.33406e-07
LRIG3	0.970703	4.3701e-07
SSPN	0.971914	4.38867e-07
TUB	0.940774	4.39426e-07
TUBGCP3	-0.945055	4.41482e-07
FBXO31	0.98307	4.43393e-07
PEAK3	-0.970715	4.47267e-07
TTN	-0.984892	4.51393e-07
CHST4	0.980609	4.54226e-07
LINC00667	-1.00336	4.55424e-07
SMAGP	-0.970873	4.57227e-07
CAMTA2	-0.967028	4.58106e-07
SLC44A1	-0.953198	4.58527e-07
SLAMF7	0.983838	4.60252e-07
TMEM217	0.97658	4.60256e-07
ABCB9	0.982006	4.6046e-07
PHF24	0.994465	4.62336e-07
CGREF1	0.971246	4.66925e-07
CD79B	0.993287	4.78721e-07
ADM2	0.981467	4.80198e-07
SUSD2	-0.958439	4.86497e-07
LINC02541	0.983674	4.87044e-07
SPRR3	0.896986	4.95171e-07
OSBPL10	0.960744	4.97888e-07
INHBB	0.986092	4.98144e-07
PRTN3	-0.970921	5.01514e-07
MTCL1	0.982533	5.02866e-07
COL8A2	0.973791	5.07368e-07
UBR2	-0.967583	5.07559e-07
APC	-0.959026	5.08353e-07
SHROOM4	-0.950703	5.11305e-07
ACSS2	-0.968076	5.14075e-07
FKBP14	0.972168	5.15616e-07
MIR4537	0.979653	5.17602e-07
SPATS2	0.981619	5.18593e-07
KHDC1-AS1	0.976686	5.24003e-07
C2orf72	-0.979863	5.26279e-07
PRRX1	0.952704	5.27893e-07
RMND5A	-0.977724	5.28568e-07
CSRNP3	0.972251	5.30302e-07
GATA6-AS1	-0.975643	5.30931e-07
FRK	0.958545	5.32296e-07
OSR2	0.973218	5.33154e-07
DEDD	-0.963933	5.35731e-07
ARMH3	-0.956301	5.36855e-07
UBXN10	0.951527	5.40469e-07
SERINC1	-0.962807	5.41823e-07
MAP2K7	-0.969911	5.42759e-07
EPB41L2	-0.948815	5.46725e-07
C7orf31	-0.970675	5.46725e-07
SP1	-0.952029	5.48638e-07
ITGB1BP2	0.99828	5.5104e-07
BTN2A1	-0.962158	5.54705e-07
DGKK	-0.982205	5.57688e-07
RAB34	0.9668	5.589e-07
NEDD9	-0.957717	5.5953e-07
MUC2	0.935454	5.60287e-07
SORBS3	-0.962027	5.63546e-07
NR3C1	-0.979127	5.64009e-07
STXBP1	-0.972391	5.65739e-07
GAD1	0.983463	5.67467e-07
IBSP	0.953148	5.71809e-07
EPHB3	0.964332	5.71911e-07
MAL	-0.973686	5.73972e-07
FADS1	-0.96126	5.77721e-07
PLA2G4F	-0.953949	5.79889e-07
PRDM11	-0.968743	5.81546e-07
RERE	-0.971835	5.84192e-07
SLC39A4	-0.965558	5.84611e-07
MC4R	0.955711	5.84644e-07
TCAP	-0.987543	5.86147e-07
KDELR3	0.957427	5.86892e-07
CD276	0.95885	5.89634e-07
SECISBP2L	-0.973074	5.94797e-07
HLA-V	-0.994974	5.98018e-07
GNA15-DT	-0.981783	5.9998e-07
PPP2R2B	0.964993	6.064e-07
ESYT3	-0.957449	6.07246e-07
ABCA3	-0.957595	6.09495e-07
NEK7	-0.981445	6.11994e-07
NLGN2	0.962288	6.12053e-07
SEC14L6	-0.966373	6.16939e-07
GP9	-0.985687	6.20819e-07
RAD1	-0.961285	6.22483e-07
TTC28	-0.958025	6.23475e-07
KAT5	-0.951869	6.24651e-07
KCNE4	0.977952	6.26062e-07
PLAGL1	-0.986215	6.28344e-07
GLO1	-0.95628	6.28544e-07
GCAWKR	0.983868	6.30464e-07
SCGB3A1	0.987543	6.33477e-07
HAGH	-0.959124	6.34399e-07
PHLDA2	0.967477	6.38491e-07
FAP	0.958639	6.42688e-07
RAB40A	-0.974724	6.46402e-07
LY6G6F	-0.955967	6.48858e-07
NTNG1	-0.974688	6.5047e-07
HEPH	0.952118	6.53499e-07
GRHL1	0.971852	6.60394e-07
MED30	-0.967991	6.64853e-07
LINC02288	-0.996014	6.65982e-07
GLI2	0.956814	6.66436e-07
PPARGC1B	-0.975713	6.6646e-07
CARD6	-0.942865	6.66461e-07
PBLD	0.944203	6.66727e-07
KIF13A	-0.974192	6.69474e-07
PPP1R14A	-0.946145	6.71783e-07
HMCN1	0.946059	6.74361e-07
SELENOP	-0.958036	6.79753e-07
MEP1A	0.970302	6.8051e-07
PRTFDC1	0.943605	6.80577e-07
SPX	-0.985577	6.84485e-07
WASF2	-0.960749	6.86289e-07
PKIB	0.955682	6.89466e-07
MRPL35	0.920316	6.96765e-07
ITGB3	0.9613	6.9963e-07
KAT6A	-0.93012	7.00978e-07
BRD2	-0.943291	7.05248e-07
DEFA4	-0.95532	7.06174e-07
NAP1L3	0.958675	7.06327e-07
SBDS	-0.955622	7.08423e-07
COL5A2	0.956266	7.09355e-07
LCN2	0.983414	7.26948e-07
CNIH1	0.94021	7.33339e-07
NRP2	0.968296	7.38335e-07
HTR1D	-0.982169	7.39156e-07
NDST1	-0.963239	7.39866e-07
LINC00589	0.932015	7.4036e-07
SOX4	0.954518	7.4589e-07
CD244	-0.971818	7.48474e-07
VWA2	0.944917	7.53111e-07
PPFIA1	-0.954634	7.54209e-07
H4C11	0.963636	7.70328e-07
RICTOR	-0.961507	7.7265e-07
OVCH2	-0.9603	7.73407e-07
PIGT	0.946673	7.75313e-07
MESP1	0.945201	7.76865e-07
TNFRSF13B	0.991399	7.78955e-07
SIAH1	-0.965978	7.81658e-07
DOK6	-0.956943	7.83836e-07
MMEL1	-0.980655	7.84467e-07
SERPINB7	0.931583	7.84619e-07
MOXD1	0.950581	7.86027e-07
MOSPD1	0.954731	7.89396e-07
CPB2	-0.952661	7.94292e-07
MMP12	0.983362	7.9589e-07
LMCD1	-0.963924	7.97553e-07
GFI1B	-0.973637	7.99615e-07
ZBTB32	0.992306	8.04414e-07
ARHGEF6	-0.958336	8.10698e-07
MYO1E	0.936088	8.14016e-07
COL25A1	0.96869	8.24855e-07
COL4A3	-0.954569	8.25261e-07
GBA3	-0.965908	8.29805e-07
[truncated: 15,465 more rows]
