# Supplementary material for: Transcriptomic and network analysis identifies shared and unique pathways and immune changes across fibrotic interstitial lung diseases
Source: Aging (Albany NY). 2024 Feb 12;16(4):3200–30. doi: 10.18632/aging.205530 (PMC10929820; doi:10.18632/aging.205530)
Supplement: Supplementary Table 3 [file aging-16-205530-s004.xlsx]

## Sheet: DEGs_CTD-ILD
Supplementary Table 3. Differentially expressed genes of CTD-ILD.
hgnc_symbol	FoldChange	adjusted_P.value
THY1	2.74004	1.88575e-07
DIO2	1.70243	3.39025e-07
MDK	1.49033	3.39025e-07
FHL2	1.80809	3.84513e-07
SCG5	1.4586	1.11502e-06
SULF1	1.70103	1.63084e-06
CLDN1	2.03637	1.63084e-06
CDH3	1.77715	1.99195e-06
BTNL9	-2.34545	2.36228e-06
HPCAL1	-1.1559	2.74232e-06
ITLN2	-3.38647	2.74232e-06
SFRP2	2.37095	5.78006e-06
CLDN2	3.04364	9.89614e-06
AGER	-2.6461	9.89614e-06
COL17A1	2.09906	9.89614e-06
PDE7B	0.90895	9.89614e-06
GPX3	-1.29228	9.93571e-06
FASN	-1.49709	1.19091e-05
COL15A1	2.03491	1.19091e-05
SALL4	1.89966	1.23577e-05
VCAM1	2.59792	1.23577e-05
DEFA4	-1.41814	1.65273e-05
GEM	1.5338	1.806e-05
KRT17	3.08329	1.84272e-05
TUBB3	1.30449	2.05064e-05
PTPRM	-0.707525	2.05064e-05
TNFRSF21	1.13608	2.06303e-05
CTSK	1.27869	2.3127e-05
CA4	-2.90309	2.43613e-05
FCN3	-2.57438	2.43613e-05
TMEM97	-1.09261	2.73371e-05
SMAD6	-1.84729	2.73371e-05
CPXM2	1.43767	3.1304e-05
CCL22	1.46059	3.34704e-05
CRABP2	1.40604	3.62302e-05
BAAT	2.15145	3.69982e-05
STARD3NL	-0.6095	3.87378e-05
DUSP5	1.71165	4.27573e-05
LSS	-0.901133	4.50067e-05
PECAM1	-0.62025	4.50067e-05
ALDH1A3	2.0254	4.50067e-05
IGFL2	2.20639	5.44329e-05
POSTN	1.7185	5.51562e-05
EFNB2	-1.00959	5.62344e-05
TRO	0.609644	5.78367e-05
TLR8	-1.00979	5.78431e-05
COMP	2.29254	5.78431e-05
PCDH7	0.758606	6.04112e-05
TMEM98	0.674406	6.05363e-05
MME	-1.17964	6.05363e-05
DEFA1	-2.73241	6.06751e-05
MAOA	-1.11787	6.06751e-05
SYTL2	0.884792	6.06751e-05
PODXL2	0.606134	6.06751e-05
VIPR1	-2.3009	6.06751e-05
CAPN5	0.885132	6.06751e-05
LRP2	-0.899154	6.06751e-05
HTRA1	0.829251	6.06751e-05
FZD8	-0.746704	6.16368e-05
TGFB3	1.41152	6.16368e-05
REP15	-0.664145	6.2764e-05
ACVRL1	-1.10575	6.51736e-05
EPAS1	-1.02231	6.51736e-05
EBP	-0.90621	6.563e-05
SERPINF1	0.99232	6.563e-05
ENTPD1	0.715728	6.70891e-05
IL13RA2	2.25079	6.89041e-05
CST2	2.09367	6.89041e-05
S100A4	-0.883814	6.89041e-05
CDH2	1.33155	6.99807e-05
ESAM	-0.840726	7.4476e-05
GJB2	1.44066	8.00425e-05
GIMAP6	-0.788991	8.00425e-05
COL1A1	2.09055	8.00425e-05
FNDC1	1.39799	8.06022e-05
UBD	1.86651	8.42685e-05
COL10A1	2.02615	8.94061e-05
TMEM100	-2.36464	9.49556e-05
KLHL13	0.667119	9.5328e-05
TBXAS1	-0.802385	0.000100137
KCTD14	-0.940341	0.00010244
LRRN1	0.895967	0.000108213
THBS2	1.68327	0.000117541
RPS6KA2	-0.882978	0.000132195
ZBED2	-1.95802	0.000135186
PTPRB	-1.20803	0.000139303
LMNA	0.826413	0.000141612
PEBP4	-1.85908	0.000141612
ARID5B	1.04864	0.000144602
PLTP	0.903644	0.000144602
DNASE1L1	-0.491414	0.0001567
DEFA3	-2.62129	0.000160057
SCARA3	0.810132	0.000163459
ADRA1A	-0.75183	0.000164487
POLR2C	-0.491814	0.000165131
MXRA5	1.38638	0.000171577
PRX	-1.60626	0.000172077
FRAT1	-0.667773	0.000177189
LDOC1	0.713432	0.000177189
OAF	1.04447	0.000177189
MMP7	2.82787	0.000179389
UNC13D	-0.68929	0.000184808
CTHRC1	1.98177	0.000184808
MMP1	2.52411	0.000184808
SLCO4C1	-1.14294	0.000193699
MLX	-0.503017	0.000199246
PDLIM3	1.18433	0.000204178
WNT10A	1.52636	0.000204178
HIRIP3	-0.655358	0.000204178
FZD5	-0.855614	0.000204178
CRTAC1	-1.66031	0.000204178
COL7A1	1.62064	0.000204178
TRPV6	1.20221	0.000207096
SMO	0.512283	0.000211453
CSF3R	-1.05047	0.000215032
LAMP3	-1.43009	0.000215034
HEY1	-1.28246	0.000218795
CST1	2.41316	0.000222548
PPARGC1B	-0.948906	0.000228396
CDCA7	1.08053	0.000231468
C1orf54	0.944485	0.000236971
ADRA1B	-1.0225	0.000237645
ADRB2	-1.06824	0.000245951
KRT14	1.95559	0.000245951
LDHD	-0.681206	0.000247993
EDNRB	-1.07601	0.000250729
FAM78A	-0.596662	0.000252601
COL3A1	1.9696	0.000258466
P2RY1	-0.763926	0.000258466
SDS	1.6296	0.000258968
COL1A2	1.51361	0.000265701
ARRB1	-0.738614	0.000265701
RS1	-1.72488	0.000265701
HSD17B6	-1.81319	0.000265701
RNASE3	-2.22792	0.000269
SPOCK2	-1.59385	0.000269
GATA2	-1.14689	0.000269
LEF1	0.761516	0.000269
IGFBP2	1.39079	0.000274896
THSD1	-0.631654	0.000274896
FBLN2	1.19223	0.000286437
CDH13	-1.03442	0.000286437
SPP1	2.97845	0.000286437
PNMT	-1.53618	0.000291577
NLGN2	0.610015	0.000292428
SYN2	-0.643469	0.000292428
DCXR	-0.820511	0.000308107
HSPA12A	0.637037	0.000308743
IGFBP7	0.760457	0.000316771
COL22A1	1.07929	0.000316771
KIR2DL3	-1.06573	0.000321001
SLC28A3	1.74313	0.000323126
FADS1	-0.840423	0.000344093
SSH2	-0.716138	0.000344093
KRT5	3.13205	0.000353422
HYAL1	-1.07806	0.000356247
ELOVL4	0.462792	0.000380924
CHN1	0.677666	0.0003827
OLFML2B	0.966528	0.0003827
FRZB	1.01609	0.0003827
MARK1	0.456607	0.0003827
DPYS	1.25719	0.000389938
SH2D3C	-0.992645	0.000389938
NFE2	-1.37044	0.000389938
DUOX1	-1.1364	0.000389938
TRIM71	-0.849707	0.0003942
MEOX1	1.31795	0.000400872
MMP11	1.88099	0.000401219
IL12RB1	-0.493467	0.000411337
GNLY	-1.23485	0.000412109
KCNMB4	-1.06047	0.000436779
ECHDC3	-0.85418	0.000437869
GSTA4	-0.780109	0.000438169
PCSK1N	0.902392	0.000449904
SLC1A1	-1.15777	0.000451516
FBXW4	-0.500074	0.000451516
DPYSL3	0.801069	0.000451516
CHRM1	-1.19574	0.000461968
SNCAIP	0.845507	0.000475254
HES4	0.793911	0.000480675
LRRC17	1.07204	0.000482159
PPFIA2	0.650337	0.000485128
WWC3	-0.54445	0.000487392
SMOC2	1.20945	0.000491783
ADIPOR2	-0.726103	0.000491783
PLAG1	-1.03394	0.000497769
NMNAT2	0.677885	0.00050677
SLC22A15	-0.626338	0.000512818
LRRTM1	1.42821	0.000512818
CAV2	-0.86739	0.000512818
EPDR1	-0.758236	0.000512818
TGFBI	0.643189	0.000518862
IRS2	-0.922517	0.000535678
TIMP3	-0.863374	0.000535678
RALGDS	0.67803	0.000535678
TM6SF1	-0.676976	0.000556357
KLRG2	-0.793748	0.000564156
HMGCS1	-1.03502	0.000580109
SERPINB5	1.99447	0.000584234
CASZ1	-0.585123	0.000584234
DEFB124	1.06115	0.000593751
PROM2	1.57708	0.000618951
ITM2C	0.988978	0.000618951
ZNF77	-0.432817	0.000618951
FMO5	-1.55803	0.000649586
PLA2G4F	-1.54254	0.000655065
CFB	1.08771	0.000655065
PRRX1	0.853465	0.000658716
TKT	-0.545225	0.000658716
UGCG	1.22592	0.000658716
IFNGR1	-0.744147	0.000666367
ITPK1	-0.463219	0.000666367
HELT	-1.24704	0.000668298
PDCD4	0.653518	0.00068149
FILIP1L	0.993407	0.000704128
MCCC1	-0.774928	0.000722433
SPRY1	0.752437	0.000722433
PCP4	1.9173	0.000722433
LGI2	0.733038	0.000722433
SLC5A9	-0.800897	0.000722433
SLC3A2	-0.570799	0.000722433
WEE1	0.803429	0.000731248
HAPLN3	1.20573	0.000734514
DNM2	-0.45381	0.000737927
CAMP	-1.09093	0.000746579
MX2	0.623797	0.000746916
MMP28	-1.04249	0.000753267
ZBTB25	-0.343503	0.000785577
RHOF	-0.566777	0.000785577
PFKFB2	-0.80962	0.000808182
RRAS	-0.777779	0.000812145
GPBAR1	-0.64445	0.000827169
GRIA1	-1.23842	0.000844601
CXCL12	1.05599	0.000878588
FGL1	-1.17073	0.000878588
MGLL	-0.629914	0.000893944
BDNF	-0.548072	0.000893944
COL16A1	0.836001	0.000904696
PRKCZ	-0.63427	0.000912707
CLEC4E	-1.01132	0.000924961
MID1IP1	-0.716769	0.000953315
PCK2	-0.553216	0.000953315
FRAT2	-0.576812	0.000959304
LGALS7	1.67795	0.000965446
SFT2D3	-0.520524	0.000975671
C2	-0.631196	0.00100512
TP53INP2	0.656046	0.00100512
PIM2	1.39858	0.00100512
F11	-0.825894	0.00100512
SCAMP5	0.780292	0.00100512
ST7	-0.498171	0.00102796
LAMA3	-0.796459	0.00103342
DAPK2	-1.14449	0.00103916
PLA2G3	-1.05061	0.00103916
GLT8D2	0.708915	0.00105351
CXCL14	1.4666	0.00105527
LIMS2	-0.782647	0.00108298
BRI3	-0.692872	0.00108815
PTGDS	1.06095	0.00110555
TMEM87A	-0.421311	0.00111845
PDE1A	0.567592	0.00111845
MPP3	-0.997781	0.00115998
C7orf25	-0.441206	0.00118044
LMO7	-1.17317	0.00118044
UBL4A	-0.490099	0.00121027
SCD	-1.23061	0.00122071
PCSK9	-0.858206	0.00123061
SPHK2	-0.425818	0.00123061
BOC	0.577817	0.00123061
STARD13	-0.617002	0.00124751
CBLN4	1.38538	0.00125326
HS6ST2	1.04642	0.00126385
CD24	1.35159	0.00126385
CACNA2D2	-1.20919	0.00127262
HEPH	0.642993	0.00129632
RGS4	1.06462	0.00129803
SPSB2	-0.835701	0.0013287
AGRP	-0.9181	0.00134622
AFF3	-0.955442	0.00134622
PLCH2	1.27508	0.00134622
TFPI	-0.717897	0.00134622
BEX1	-0.84763	0.00134622
PPL	-0.630485	0.00134622
ISYNA1	0.480719	0.00134622
RNF150	0.645258	0.00134622
NKD1	-0.864237	0.00134622
DBN1	0.601969	0.00134622
MEG3	1.13005	0.00134622
MPST	-0.583599	0.00134672
THBS4	0.896878	0.00135002
EFNB3	1.04599	0.00137528
NUDT16	-0.819579	0.0014228
NFIB	0.450187	0.0014228
TUBB2B	1.05103	0.00142476
BDKRB1	1.19965	0.00142476
CLEC1B	-2.01615	0.00142658
TWIST1	0.568918	0.00146274
GP9	-1.74258	0.00146359
WNT3A	-1.03479	0.00149385
NOVA2	-0.610236	0.00149506
SOX4	0.690364	0.00149506
FRMD6	0.568604	0.00149506
TNFRSF4	0.658411	0.00149875
TPST2	-0.499809	0.00152101
LTK	-0.814598	0.00155464
PTGFRN	1.33184	0.001559
PGD	-0.5648	0.00160617
CCL7	1.07527	0.00160832
MTHFS	-0.535899	0.00160832
GPM6B	-0.906603	0.00160832
ESR2	0.855875	0.00161755
CNTN3	0.723296	0.00163063
COL5A2	1.24923	0.00163063
IGFBP4	0.881932	0.00163063
VNN2	-1.04874	0.00163511
DOCK9	-0.68585	0.00164798
BNC2	0.440639	0.0016665
TNNC1	-1.46852	0.00167997
RGS9BP	-1.29897	0.00168826
ZBTB7B	-0.430683	0.00169286
GEMIN5	-0.403457	0.00169286
MARCKSL1	0.793338	0.00170287
TSSK3	-0.441917	0.00173
NDRG4	-1.3173	0.00173
DERA	-0.43339	0.00175919
BEX2	-0.684155	0.00176464
FOXC1	1.21083	0.00179286
NEBL	-0.636821	0.00179286
TEK	-1.10764	0.00179767
COL9A2	0.829842	0.00180522
ACSS2	-0.685519	0.00180522
CDC25B	-0.61634	0.00180522
SCNN1A	-0.807052	0.00180522
TOX	-0.536503	0.00180522
ADAM23	0.732951	0.00180522
CBS	-1.0045	0.00180522
KRT16	1.15554	0.00180522
GCNT3	0.952129	0.00182434
TUFT1	-0.655409	0.0018328
AGPAT2	-0.559191	0.00184319
CCR7	0.982607	0.00184319
SH3GL3	-0.840384	0.0018436
SOX13	-0.541588	0.0018455
SLC16A9	0.584038	0.00184556
MC1R	0.639213	0.00184556
COL18A1	0.755997	0.00185771
AKTIP	-0.415177	0.00187802
ENAH	0.524555	0.00187802
NOTCH4	-0.833796	0.00187802
P2RY13	-0.711059	0.00188826
RASGRP4	-0.756076	0.00190333
RALGPS2	0.883382	0.00190485
SYT15	-0.699553	0.00191102
GAMT	0.514506	0.00191102
SDCCAG8	-0.435491	0.0019171
GAB2	-0.470958	0.0019171
CD1A	1.30184	0.00192114
POGK	-0.399615	0.00192275
OGG1	-0.391378	0.00193167
TCF4	0.579821	0.00193315
KCNS1	-1.12028	0.00194646
CLEC4D	-0.724071	0.0019596
PLA2G1B	-1.8213	0.00196081
ANTXR1	0.962201	0.00198263
EPHA3	0.743431	0.00199992
RHOBTB2	-0.713425	0.00202192
GALNT13	-1.23444	0.0020224
RAB11FIP1	-0.879209	0.0020224
FAH	-0.432501	0.00203362
SLC19A3	-1.04701	0.00203362
TNNT2	-0.565923	0.00203712
HTATIP2	-0.49894	0.00203712
SORBS3	-0.32835	0.00203712
SETD3	-0.306887	0.00207443
TTC3	0.444464	0.00207693
EGFL7	-0.854755	0.00210729
OR4C46	-0.490601	0.00211349
LILRA2	-0.780654	0.00211349
REPS2	-0.517249	0.00212944
ACADL	-1.30841	0.00213082
PTHLH	0.642016	0.00213082
HSPA4L	0.592004	0.00213305
SNX25	-0.847678	0.00216661
SYNJ2	0.457791	0.00218122
C15orf48	1.05383	0.00218223
APOA1	-1.24978	0.00218223
RPP25	-0.535764	0.00218247
PPP1R10	0.558945	0.00218247
TEX2	-0.39558	0.00218767
ALDH18A1	0.61254	0.00218767
KLF15	-1.02266	0.00219396
FGFR4	-0.909256	0.0022036
OLFM4	-1.71635	0.0022036
SCN1A	-0.824697	0.0022036
EIF4G3	0.352038	0.0022179
CD207	1.44838	0.00223795
PRRT2	0.671748	0.00223795
RRAD	0.973531	0.00223981
ARG1	-1.49211	0.00223981
ACRBP	-0.71979	0.00226962
GGT1	-0.84636	0.00226997
CKMT1A	0.94845	0.00229426
GPD1L	-0.732211	0.0022998
CTNNBIP1	-0.715618	0.00234707
FMO1	0.948962	0.00235051
MOAP1	-0.393416	0.00235588
FXYD4	-1.28879	0.00237233
TNFRSF10B	0.66252	0.00238722
FRS3	-0.461424	0.0023919
NCOA7	0.912152	0.0023919
TNFRSF9	0.526783	0.0023919
KLF13	-0.62646	0.0023919
RAB40C	-0.549365	0.00244103
FLNC	1.14947	0.0024468
LXN	0.848408	0.0024468
ARID3A	-0.438648	0.00250489
SLC16A2	0.471356	0.00250596
TTN	-0.668573	0.0025325
HPN	-0.886079	0.00254879
CFH	0.972276	0.00260155
ZNF467	-0.584715	0.00260155
TRIM2	0.954754	0.00261793
IL4I1	0.718105	0.00264779
NET1	0.54499	0.00264779
MFAP2	0.762442	0.00266362
MYLIP	-0.626917	0.00266362
CAPN13	1.67499	0.00266626
ACOT1	-0.43553	0.00267529
USHBP1	-0.747193	0.00268321
GNG4	1.10929	0.0026942
SH3GL2	-0.959889	0.00269953
STEAP2	0.816898	0.00272063
HSPA12B	-1.0165	0.00272063
ZDHHC7	-0.351701	0.00282881
LOXL1	0.656226	0.00282881
COL4A6	1.06846	0.0028637
C1orf115	-0.658573	0.0028637
OLFM1	0.604273	0.00288031
ZMAT3	0.45279	0.00288031
UCN2	1.13027	0.00288824
ARHGAP15	0.586051	0.00289785
SNX22	-0.964568	0.00289785
ADRB1	-1.3022	0.00291486
OSBPL10	0.434398	0.00292895
ARTN	0.968861	0.0029506
WWC2	-0.854169	0.00296636
NKG7	-1.03924	0.00296636
RAB17	-0.871603	0.00296636
SPRR1A	1.13264	0.00306415
SSPN	0.935146	0.00306635
PAPSS2	-0.964687	0.0030721
CCND3	-0.557442	0.00313089
SDK2	0.624419	0.00313507
MAGED1	0.509736	0.00314837
PRCP	0.617837	0.00316498
NRIP3	0.687498	0.0032376
CADPS	0.466087	0.0032422
IGFL1	1.30995	0.0032422
PLEK2	0.450001	0.00326852
DCAKD	0.441066	0.00332767
ASB2	0.36274	0.00332767
HIF3A	-1.14455	0.00332767
POLA2	-0.331665	0.00336066
PREX1	-0.654503	0.00336066
RGS17	0.701395	0.00336066
FAM43B	0.966896	0.00337544
VWA1	0.619534	0.00337969
KIR3DL1	-0.699244	0.00338211
PTPN21	-0.651018	0.00339326
PIK3R1	-0.611197	0.00340881
BCAP29	-0.339403	0.00340881
NUPR1	-0.701406	0.00341755
ZBTB32	0.700244	0.00342078
PER2	0.705043	0.00342078
CLEC11A	0.698666	0.00342806
N4BP1	-0.667006	0.00346531
PDLIM4	1.23592	0.00346531
IL1RL1	-2.29561	0.00346531
TF	0.789108	0.00346531
WNT7A	-0.863014	0.00346631
TALDO1	-0.372271	0.00346631
TTYH3	0.55727	0.00348585
CD200	0.571938	0.00354994
ANGPTL2	0.785678	0.00358722
RAB34	0.342015	0.00360436
ANKRD29	-0.904418	0.00361204
PRKCE	-0.974311	0.00369451
DNPEP	-0.34977	0.00370738
ARHGDIG	0.902893	0.00374963
C1orf198	-0.625291	0.00375773
CCL19	1.82238	0.00375773
MATN3	-0.910013	0.00380305
PRTN3	-0.958308	0.00383527
ARHGEF10	-0.74139	0.00384803
PTCRA	-0.611378	0.00384803
TRIB3	-0.727329	0.00384803
SCG2	0.800355	0.00384803
KCNN4	0.475385	0.00385393
PROK2	-1.62406	0.00385462
RNASE2	-1.23349	0.0038696
MYRIP	0.704192	0.00387895
GRPEL2	-0.50738	0.00387895
MKNK2	-0.427878	0.00390221
AEBP1	0.685114	0.00390222
MB	1.12974	0.00390222
MUC20	0.875223	0.00390222
MLLT11	0.81567	0.00390222
CCNB1IP1	-0.473609	0.0039172
LIPH	-0.685459	0.0039172
ZNF30	-0.487812	0.00403568
MAP4K2	-0.645598	0.00403568
PSD3	0.481595	0.0040512
GOLT1A	-0.683282	0.0040512
PGLYRP1	-0.841106	0.00411726
BVES	-0.422012	0.00412601
AGTRAP	-0.355712	0.00412601
VAMP5	-0.481389	0.00413191
IGSF9	1.25841	0.00418668
LTBP3	0.463027	0.00418668
MYOM1	0.772545	0.00422329
CEBPA	-1.07393	0.00422533
BCKDHA	-0.339903	0.00423742
ARHGAP6	-0.766229	0.00424241
PAQR5	-0.584235	0.00424241
ACTG2	1.57265	0.00424241
GATA3	-0.727897	0.00426184
RBP5	0.750271	0.00430864
FAM83A	1.36763	0.00440425
CTLA4	0.60074	0.00440425
GYG2	0.982681	0.00446422
SEC22C	-0.427166	0.00450745
MAPK14	-0.376965	0.0045139
SLFN13	0.599951	0.00452731
MLPH	-0.925996	0.00457579
CABYR	0.86646	0.00460232
WASF3	-0.618938	0.00460232
SLC27A3	-0.867072	0.00461394
PLA2G7	1.12786	0.00464785
MAF	-0.619893	0.00465111
KRT6A	2.06609	0.0046873
BRF2	-0.537695	0.0046873
SCEL	-1.26123	0.0046873
MAGI3	-0.600541	0.0046873
HOXC4	0.562268	0.00470377
SLC35F2	0.591278	0.00470377
SLC6A4	-2.33924	0.00470377
PHLDA1	1.14296	0.00470636
RPH3AL	-0.563991	0.00473495
ST6GALNAC3	-0.871005	0.00474014
TSPAN4	-0.454731	0.00474014
SLC22A1	-0.349107	0.00474014
ATP8B4	0.464102	0.00474014
CD33	-0.488833	0.00474423
SHMT1	-0.465268	0.00477457
AATK	-0.586476	0.00479116
NOTCH3	0.734429	0.00481088
MGST1	-0.70768	0.00481412
KCNAB2	-0.464218	0.00481412
HMGB3	1.04175	0.00481412
RGS19	-0.499811	0.00481412
IL1RN	1.20898	0.00484095
TNFRSF18	0.587629	0.00484095
PGM2L1	0.505828	0.00490786
HYAL2	-0.920222	0.00490786
DCLRE1A	-0.344432	0.00490786
AKR1C3	-0.601588	0.00492088
SH3PXD2A	0.636154	0.00494147
SNAP25	0.743076	0.00497836
ASRGL1	-0.670878	0.00497836
ICAM2	-0.767687	0.00497836
VGLL3	-0.8565	0.00497836
GRM8	-1.32328	0.00498694
COLEC11	0.673377	0.00498694
C9orf152	-0.978134	0.00498694
CREB3L2	0.433152	0.00498694
OXCT2	0.539396	0.00503163
HABP2	1.32693	0.00505468
KCNMA1	0.634839	0.00509614
USP44	-0.574667	0.00509614
TBCE	-0.358788	0.00509614
TGIF2	0.341413	0.00516434
OR7E37P	-0.54873	0.00523902
KLHL3	0.557833	0.00523902
KIF7	0.387243	0.00534659
IGFBP5	1.08092	0.00535013
SULF2	0.561189	0.00535013
SSTR2	0.692705	0.00535013
GREM2	0.892675	0.00540241
HPSE2	0.86704	0.00540646
HTR3C	-1.4223	0.00540646
DYRK2	0.438648	0.00549155
GPR37	0.488862	0.00550996
CCND2	0.592395	0.00551519
WWC1	-0.596472	0.00551519
SIL1	0.417788	0.00551519
ROBO3	0.46781	0.00551519
CLCN6	-0.323819	0.00551519
EBF3	0.930013	0.00551519
LIF	1.38973	0.00551519
OPHN1	-0.472142	0.00551519
CCL2	1.92313	0.0055183
ADH5	-0.641435	0.00553532
RBMS2	-0.533589	0.00553532
MPO	-0.929112	0.00556731
SCNN1D	0.466569	0.00556731
DLX5	1.24662	0.00560105
VWCE	0.792197	0.00560105
SFTPD	-0.869538	0.00560116
SGCG	-0.856598	0.00560255
PAK4	-0.571488	0.00562305
VEPH1	-1.07277	0.0056432
SERPIND1	1.96176	0.00566193
ZC3H10	-0.346067	0.00566193
CROT	0.50325	0.00568891
TNFAIP3	1.17141	0.005703
MAT2A	0.72694	0.00575046
GADD45A	0.983792	0.00576063
ARRB2	-0.405634	0.00576317
TOMM34	0.521875	0.00580751
ALOX12	-1.27737	0.00580784
RHOD	0.58842	0.00581281
KIF1C	-0.409696	0.00581281
ECM2	0.982223	0.00581281
DUSP14	0.839875	0.00581802
MTCH1	-0.303038	0.0058447
GDF10	-1.1165	0.0058447
HMGCR	-0.518522	0.0058447
CDKN1A	0.977411	0.0058447
AIG1	0.379892	0.00585764
CAP2	0.554258	0.00585764
CCDC3	0.937554	0.0058615
CSPG5	-0.886087	0.00586502
NFATC1	0.6178	0.00597166
TMEM156	0.711256	0.00598675
IRF2	-0.986636	0.0060278
CLIC3	-1.0969	0.0060278
ALKBH4	-0.386719	0.00611303
ANK2	1.05533	0.00611303
DGKA	0.433626	0.00611516
ZDHHC19	-0.954293	0.00611516
S100A8	-1.37037	0.00615607
GALK1	-0.455616	0.00628152
EPB41L5	-0.647829	0.00628152
FUT1	-0.958514	0.00632714
CFI	0.660083	0.00632714
LYPD3	0.588603	0.00633406
SIX4	0.987673	0.00635513
EGLN2	-0.322158	0.00642535
SLC25A43	-0.36066	0.00642535
S100A9	-1.28469	0.0064738
FNDC4	0.67885	0.0064738
FOXF1	-0.812666	0.00650111
ETV6	0.44144	0.00650111
ELOVL3	-0.450223	0.00650388
ST6GAL1	0.565407	0.00650484
ABCG1	-0.546635	0.00650484
DLG2	0.700046	0.00653143
SPRR1B	0.727001	0.00654223
CDKN2A	0.508524	0.00654223
ABCC13	-0.398298	0.00654223
SORT1	-0.507972	0.00657442
TMEM125	-0.791867	0.00657442
ADAMTS14	0.668875	0.00660435
MPPE1	-0.454396	0.00666294
CCL13	0.792071	0.00666294
EPHB1	0.610182	0.00666294
ACOT2	-0.977568	0.00666294
HERC3	-0.508582	0.00666294
C9orf50	0.948148	0.00667098
MAP1B	0.757521	0.00674467
MYH11	1.13218	0.0069348
PPP2R5A	-0.520387	0.00694936
MMP10	1.9254	0.00695069
BDKRB2	1.2538	0.00704541
SNX27	-0.31845	0.00711817
FCGBP	1.00467	0.00712254
OSGIN1	-0.48955	0.00712325
CHCHD7	-0.514469	0.00715003
FGF11	0.553269	0.00717114
ADAM28	0.637266	0.00717114
FBXO32	0.768772	0.0072395
MTM1	-0.360788	0.0073031
EIF4EBP2	-0.30538	0.00739097
CLDN18	-1.81219	0.00743684
HDC	1.29056	0.00743684
SDHB	-0.323828	0.00743684
INMT	-0.944144	0.00743684
RPUSD3	-0.485413	0.00743684
DOCK3	1.05758	0.00750929
HRC	0.739016	0.00751137
SLCO1A2	-1.11893	0.00751137
CCL8	1.0671	0.00751137
TNIP3	0.749282	0.00752494
TBX3	-0.761826	0.00752494
SIRPD	-0.743632	0.00760934
MFAP3L	-0.81005	0.00766136
SFTPA1	-1.13214	0.00766651
TP53BP1	0.50275	0.00771389
CDKL5	-0.66461	0.00776207
SH3BP5	-0.887207	0.00785579
FYN	-0.421299	0.00789762
ID1	-0.818059	0.00793744
LIN7A	-0.516177	0.00793744
EYA2	0.886421	0.00793744
SNX15	-0.325182	0.00800914
B3GNT6	-0.655449	0.00804199
CMTM8	-0.582547	0.0081284
UGT1A6	1.58715	0.00824289
TCF21	-0.756968	0.00831236
MYO1F	-0.601665	0.00845766
PTGS2	1.18424	0.00845766
SLC2A5	0.770942	0.00845934
CNKSR3	0.890964	0.00850844
RAB23	0.496373	0.00852075
ZSWIM4	0.529947	0.00852075
CAV1	-0.737234	0.00860235
TNC	0.885425	0.00861977
MRPL46	-0.336275	0.00861977
CITED2	-0.716257	0.00869382
CPT2	-0.403075	0.00869382
BIRC3	0.697275	0.00872895
ZNF597	-0.336757	0.0087434
GPR157	-0.919022	0.00881658
GPM6A	-0.554201	0.0088192
TMEM41A	-0.440739	0.00891134
CSTA	-0.451306	0.00893272
CGB5	0.737506	0.00893272
CABP5	-1.11956	0.00895782
COL4A5	0.583335	0.00896571
DLG4	0.44192	0.00899197
LYSMD4	-0.459847	0.00899197
CNN1	1.19928	0.0090617
COL6A1	0.680957	0.00906569
CLCA2	1.90154	0.00906569
RSPO1	-0.713525	0.00910929
RTN1	-0.466107	0.00914169
MMP25	-0.857783	0.00915867
RUNX2	0.414729	0.00916091
POU2AF1	1.21263	0.00917037
CBLB	0.490435	0.00920947
EFNB1	-0.637718	0.00921621
SLC16A13	-0.47237	0.0094571
MOXD1	0.880711	0.00949632
FDFT1	-0.45845	0.00949632
PGC	-0.995761	0.00955768
FAM89A	-0.578413	0.00959185
TRIM58	-0.623433	0.00959317
DAPP1	0.636517	0.00970631
CHI3L2	-1.05044	0.00973854
SERPINB13	1.45352	0.00994886
AFF2	-0.55929	0.0100141
PKN1	-0.339058	0.0101138
SUMO3	-0.282946	0.0101296
LACTB2	-0.510277	0.0101983
RGS5	1.07909	0.0102619
MCM4	0.44358	0.0103471
RRBP1	0.393008	0.0103724
MMP13	1.25286	0.0103724
ACAT1	-0.385826	0.0104692
CKMT1B	1.10157	0.0104692
FANCE	-0.388446	0.0104692
ZNF333	-0.404441	0.0104692
FOXR1	-0.654368	0.0104996
ANXA13	0.865146	0.0105512
NDP	0.699088	0.0105512
NOTCH1	-0.467389	0.010574
MAN2A2	-0.417826	0.0105802
TMEM164	-0.580976	0.0105923
PRDX4	0.580712	0.0105923
AKT1	-0.247203	0.0105923
TUB	0.39141	0.0106059
FST	0.704344	0.0106238
ACACA	-0.367593	0.0106238
NPR3	-0.880404	0.0106707
PDE4DIP	-0.532331	0.0106707
IRF1	1.0568	0.0106707
TNFRSF19	0.662237	0.0106951
CLEC12A	-0.662528	0.0106968
IL15RA	-0.472985	0.0107028
CDCA7L	-0.483641	0.0107028
DDX54	-0.281128	0.0107062
FZD9	-0.718547	0.0107754
FCER1G	-0.440594	0.0111295
IL18RAP	-0.74117	0.0111314
AMIGO2	-0.561781	0.0111314
CH25H	1.2338	0.0111314
SLC4A11	1.13274	0.011133
GRIA3	0.402529	0.0111791
FOLR3	-1.41461	0.011191
CLSTN1	0.553999	0.0112092
PGM2	0.412435	0.0112092
SIGLEC5	-0.671226	0.0112892
ZNF319	-0.332213	0.0113049
KRT6B	1.70233	0.0113049
STXBP6	-1.18406	0.0113211
ATG4B	-0.380727	0.0113291
USP2	0.695587	0.0113583
ENC1	0.60285	0.0113583
GLO1	-0.385915	0.0113752
TMEM45A	1.23052	0.0113752
PRSS8	-0.641475	0.0113752
CILP2	1.0802	0.0114344
GYPC	-0.509462	0.0115145
IGF1	1.07103	0.0115146
C1orf162	-0.643492	0.0115146
GRAP	-0.47245	0.011542
TPD52L1	0.339097	0.011542
TNFSF13	-0.420413	0.01169
TMEM132A	0.474444	0.01169
RHBDF1	-0.401723	0.011707
MEIS2	-0.365315	0.011707
RREB1	-0.321457	0.0118551
FASTKD3	-0.42881	0.0119367
KCND1	0.345817	0.0119559
TSPAN8	1.01721	0.0119656
P2RX3	-0.795261	0.0119656
SLC25A5	-0.304488	0.0119656
RET	0.577118	0.0120978
CNTROB	-0.532656	0.0120978
LAT2	-0.463935	0.0121265
ARHGAP26	-0.291398	0.0122617
NMUR1	-0.789451	0.0123001
RHBDL1	0.515155	0.0123001
NCR1	-0.836763	0.0123001
SCO2	0.391685	0.0123001
RHOQ	0.432666	0.0123421
MKRN2	-0.315445	0.0123421
ACTN1	0.640515	0.0123421
SLC6A1	1.10407	0.0123548
APOA5	-0.931133	0.0123916
CD300LG	-1.03412	0.0124011
GNMT	-0.632805	0.0124259
LRP3	0.348763	0.0124427
CPB2	-1.26203	0.0125537
SLC7A7	-0.59039	0.0125537
NPAS4	0.898047	0.0126882
POLR1D	-0.389944	0.0126882
SFTPB	-0.627173	0.0126882
CDKN1C	-0.514123	0.0126935
LAMC3	-0.958085	0.0126935
DYRK3	0.579239	0.0127674
CD244	-0.589279	0.0128308
TM4SF19	1.00218	0.0128859
BCAT2	-0.615399	0.012903
CXCL13	1.65582	0.0129092
LRRC25	-0.673634	0.0129245
B3GALNT1	-0.701981	0.0129439
ANKRD37	0.728698	0.0129463
TMPRSS4	0.863524	0.0129901
PARD6G	0.238136	0.0129901
NCF4	-0.493498	0.0129901
IGLL1	1.23111	0.0129901
RAB32	-0.503104	0.0129901
TFAP2A	0.536551	0.0129901
ZNF438	-0.276873	0.0129901
CEL	0.447272	0.0130273
RELB	0.835927	0.013046
MMP24	-0.565846	0.013046
FLRT2	0.609964	0.0131231
SLC25A24	-0.441239	0.0131341
ZXDC	-0.330559	0.0131468
DHODH	-0.398198	0.013149
DPP6	-0.554129	0.0132284
NOSTRIN	-0.708375	0.0132648
CARD6	-0.351323	0.0133831
UBE2Q1	-0.248898	0.013575
CXCL6	1.5131	0.0135874
HSD11B1	-0.742023	0.0136902
LILRA1	-0.945827	0.0136902
KLRD1	-1.00456	0.0138347
MLXIPL	-0.544415	0.0138376
TNN	0.965521	0.0138376
ABCC5	0.590129	0.0138376
CLIC6	1.14409	0.0138463
STX11	-0.754541	0.0138552
NRXN2	0.526329	0.0138552
EGFLAM	0.373444	0.0139577
NELL1	0.562993	0.0139961
EFHC2	1.02996	0.0140287
APBB1IP	-0.43551	0.0140287
PTPN18	-0.400407	0.0140636
SHC4	0.561245	0.0141022
S100A14	-0.493432	0.0142117
GPR142	0.802779	0.0142221
CSF2	-0.832111	0.0142221
DUSP7	-0.552434	0.0142322
HHAT	0.534023	0.0142322
IFITM1	0.709419	0.0144029
DENND3	-0.591771	0.0144029
ITGA7	0.702388	0.0144029
ARHGEF18	-0.306192	0.0144029
ABCA3	-1.06929	0.0144029
CC2D1B	-0.386482	0.0144702
PAM	0.353827	0.0144721
WFDC10B	-0.865726	0.0144721
POFUT2	0.333421	0.0145098
GIMAP8	-0.585897	0.0145098
POLB	0.310398	0.0145398
LILRA5	-0.682484	0.0145398
KLRC3	-0.74102	0.0145398
KRT15	1.68718	0.0145467
TRPV4	0.729728	0.0145467
SSX4B	-0.755682	0.0145604
BACE2	0.725006	0.0145883
RFX5	0.346993	0.0146595
ZSCAN4	0.661667	0.0147796
INPP5A	-0.348738	0.0147875
CLEC14A	-0.729346	0.0147875
PGM5	0.723696	0.0147875
MYCBP2	0.338507	0.0147875
CCR6	0.306575	0.0147968
RAB3C	1.08601	0.0149894
PAK1	0.433514	0.0150015
QDPR	-0.473715	0.015002
SYNPO2	0.478184	0.0150037
TBPL2	0.36732	0.0150115
PKNOX2	-0.532625	0.0150194
C1QB	-0.637122	0.0151054
GPR146	-0.497834	0.015187
EPHA2	0.585665	0.0153819
COL6A3	0.922275	0.0153819
SIX1	1.10842	0.0153976
CAPN9	-0.908749	0.0155019
RALA	-0.488974	0.0155019
PPP2R2A	0.265594	0.0155019
TRIM47	0.558866	0.0155149
SCUBE2	0.400545	0.0157107
FREM1	0.449684	0.0157514
CALCRL	-0.81802	0.015779
PRDM16	-0.472421	0.015779
SLCO4A1	-1.1161	0.015779
SLC24A4	-0.387118	0.015779
C1orf116	-1.06734	0.015779
CD36	-0.655719	0.015779
INPP4B	0.484435	0.0157897
CASP5	-0.603727	0.0157897
SH3RF2	-0.34382	0.015797
CP	1.15131	0.015848
CR2	1.20101	0.015848
PCDH19	0.523073	0.0159249
IFNAR2	0.382764	0.0159249
MEF2A	-0.409402	0.0159249
GLA	0.368268	0.0159249
TM7SF2	-0.541033	0.0160098
DGCR5	0.552397	0.0160557
ZSCAN1	-0.459223	0.0161051
PLEKHA4	0.578047	0.0161119
GBX2	-0.46874	0.0163007
LY6G6D	-1.02073	0.0163802
PTGES	0.851623	0.0163802
ALPL	-0.706108	0.0164337
MGAT4B	-0.284431	0.016451
SLC4A7	0.536189	0.0165127
ACSM3	-0.433293	0.0165284
IER3	1.02518	0.0165284
PILRA	-0.40874	0.0166529
RNF135	-0.331002	0.0166529
WDR27	0.545461	0.0166529
MLF1	0.901993	0.0166713
ARHGAP19	-0.346711	0.0167168
ROR2	0.42754	0.0167168
TMED3	0.41023	0.0167862
SLC30A3	-0.542909	0.0168953
RIMS4	-0.359695	0.0168953
RBP2	-0.491915	0.0170449
PADI4	-0.848011	0.0172182
TM4SF1	0.445721	0.0172622
USP19	-0.345484	0.0172622
CHRD	0.396802	0.0172622
LITAF	0.512076	0.0173077
UPK3B	-0.853763	0.0173525
CASP12	-0.952091	0.0174154
LIM2	-0.643121	0.0174298
BFAR	-0.381398	0.0174569
GCDH	-0.284773	0.0175792
GAP43	0.5628	0.0175987
PMM1	-0.613342	0.0176431
ATP2A2	0.484951	0.0176482
TIRAP	-0.24983	0.0178067
ZFP42	0.718617	0.0178095
MRPL20	-0.42199	0.0178345
AXIN2	-0.551771	0.0179175
TOR2A	-0.305149	0.0179877
RBM38	0.540206	0.0180037
PLAU	0.770474	0.0180037
SLC22A3	-0.775884	0.0180578
PRND	1.20938	0.0181105
ABCB1	0.563637	0.0181105
SLC30A7	0.398992	0.0181105
ANAPC10	-0.274918	0.0181192
GPR89A	-0.406911	0.0181822
IDH3B	-0.240994	0.0181822
LYL1	-0.524493	0.0182166
LLGL2	-0.50673	0.0182343
PELI1	0.587316	0.018259
NAPSA	-0.650797	0.0182609
AGPAT3	-0.326896	0.0183265
TNS3	-0.43897	0.0183395
FKBP11	0.721841	0.0183997
FHOD3	0.877622	0.0184375
ARC	-0.522721	0.0184375
ZNF215	0.547151	0.0184375
NETO1	0.738458	0.0185242
UPB1	-0.639559	0.0185242
TUBGCP3	-0.402642	0.0187069
ATP1A2	0.615578	0.0187586
SERPINF2	-0.819126	0.0187897
MRPL22	-0.270544	0.0190651
NBL1	0.573387	0.0190871
KIR3DL2	-0.771632	0.0190931
ACY3	0.761205	0.0191951
SLC7A5	1.01067	0.0191951
ATP9A	0.473758	0.0193284
AQP4	-1.02913	0.0194151
MGP	0.536636	0.0194579
SPRR2D	1.42472	0.0195054
STAB2	1.0589	0.0195138
CEACAM4	-0.467842	0.0195196
EGFL6	0.913292	0.0195766
CHRDL2	0.940332	0.0195766
TNFSF14	0.638428	0.0196054
GJA10	0.705944	0.0196699
HSD17B4	-0.355682	0.0196901
PLA2G12B	-0.961906	0.0197694
ADARB1	-0.503726	0.0197946
S100A2	0.888944	0.0199617
ERGIC3	0.372243	0.0200262
WBP2	-0.314005	0.0200818
DTX2	0.538501	0.0200818
COL6A2	0.501312	0.0200857
BCAR3	-0.331764	0.0201
INHBB	1.10887	0.0201306
CCL18	0.727223	0.0201306
ALDH3B2	0.956427	0.020141
KLK12	1.44816	0.0201865
PODN	0.637924	0.0202082
PHF13	0.365426	0.0202082
MVD	-0.605327	0.0202105
TXK	-0.591505	0.0202111
SQLE	-0.540313	0.0202536
IL6	1.78509	0.0202536
BOLA1	-0.399631	0.020396
SCRG1	0.932603	0.020396
TACC2	-0.757066	0.0204639
MUC4	0.901793	0.0205618
ATP8B1	0.33838	0.0205618
LRRIQ1	1.19096	0.0206279
EGF	-0.620881	0.0206551
SIRT4	-0.476379	0.0206551
KHDRBS3	-0.392183	0.0206551
CHDH	-1.04552	0.0206999
CYP1A1	-0.802392	0.020732
PRSS21	-0.879242	0.020788
JPH1	-0.593502	0.020788
SETBP1	0.285256	0.0208249
ABCG4	0.600022	0.0208485
KCNMB1	0.614805	0.0208485
CTSZ	0.478803	0.0208485
PPP4R1L	-0.418822	0.0208485
CLCN4	-0.521169	0.0208846
CASP3	0.287113	0.0209958
CHST6	1.15161	0.0209958
MRPS15	-0.305843	0.0209958
PURB	0.227242	0.0209958
ALDH3A1	1.37419	0.0210116
KNTC1	0.348968	0.0210116
FJX1	0.819836	0.0210116
SEC14L4	-0.94072	0.0210116
ARHGAP25	-0.370817	0.0210116
NFKBIE	0.603346	0.0210147
ARHGAP27	-0.433434	0.0210965
OPLAH	-0.321467	0.0211727
CORIN	0.787269	0.0212786
TNIK	-0.399728	0.0212786
FGR	-0.551508	0.0214125
CCNE1	0.441194	0.0214138
MVK	-0.45554	0.0214138
SPSB1	0.908515	0.0214274
ZNF207	0.241972	0.0214301
POLR3H	-0.550889	0.0215613
FBXL2	0.423786	0.021594
MLH3	-0.238183	0.0215984
SOX8	0.411295	0.0216291
CLCN5	-0.444791	0.021639
PRSS16	-0.43681	0.021639
IRX1	-0.25702	0.0216428
MFNG	-0.461898	0.0216428
BNIP3	-0.513743	0.0216459
ITGA10	-0.787952	0.0216459
TRAF6	-0.231239	0.0216895
CLCF1	0.524634	0.0217677
PPP1R14A	-0.617214	0.0219224
FGD1	0.36524	0.0219224
ARL9	0.740408	0.0219905
ROR1	-0.54453	0.0219905
C5orf15	0.340659	0.0220134
DFFB	-0.278326	0.0223227
SVEP1	-0.817686	0.0223859
TMEM126A	-0.309104	0.0223872
TYMS	0.713162	0.0224209
CNTNAP2	0.692846	0.0224209
PRR13	-0.294987	0.0224209
TSPO	-0.328649	0.0225046
IL11	1.30214	0.0225599
ZNF350	-0.336099	0.0225741
FUT2	1.30817	0.0226849
TPRKB	-0.801524	0.0227447
MAPK13	-0.378097	0.0230175
CDH5	-0.613837	0.0230464
MAPK1	-0.276957	0.0231358
RIMS1	0.782475	0.0231436
SLC22A17	0.42202	0.0232008
OLFML2A	-0.592297	0.0232028
UNC13B	-0.602641	0.0232435
ASF1A	-0.465541	0.0232444
CDKN2D	-0.403339	0.0232628
CD163	-0.746457	0.023286
SORCS2	0.516646	0.0232912
CPNE2	-0.364292	0.0233777
SRGAP2	-0.266323	0.0235503
BCL3	0.997083	0.0235608
DES	1.18699	0.0236053
SLC22A2	-0.651568	0.0236053
SFT2D1	-0.282927	0.0236053
ROBO1	0.531056	0.0236243
GPR152	-0.895262	0.0236343
TPTE2	0.749322	0.0236398
COX11	-0.385363	0.0236772
EIF4ENIF1	-0.28339	0.0236772
PIP5K1B	-0.984868	0.0236772
CAPN2	-0.245632	0.0236772
CPNE4	1.1719	0.0236772
ATP1B2	0.316091	0.0236772
CD79A	1.31165	0.0236772
R3HDM2	-0.247297	0.0237009
STARD7	-0.306704	0.0237228
CNFN	0.505176	0.0238456
GBP2	0.469899	0.0239164
SYN3	-0.720035	0.0239354
SPI1	-0.450598	0.0239674
IL10	0.514002	0.0240014
FAP	0.69451	0.0240634
CST5	0.462926	0.0240634
PLAUR	0.586223	0.0240634
SLCO2A1	-0.858137	0.0241154
PAQR7	0.497635	0.0241395
TM4SF4	-0.80078	0.0242214
SLC20A1	0.518872	0.0242997
RASGRP2	-0.573993	0.0243407
OAZ1	-0.217656	0.0243623
KL	-0.774162	0.0243623
KCNJ16	0.838913	0.0243623
BBOX1	0.658338	0.024503
PCTP	-0.703542	0.0245199
ACOXL	-0.886389	0.0245199
RGS18	-0.708401	0.0245781
CTSE	0.712528	0.0245781
ALOX15B	-0.939433	0.0245781
ROBO4	-0.532908	0.0245781
RHOT1	-0.307525	0.0245959
RNF8	-0.260723	0.0245989
DHCR7	-0.555785	0.0246187
ZNF2	-0.27566	0.0246989
ANXA10	0.946942	0.0246989
COL4A3	-0.701176	0.0247161
IPO11	0.369976	0.0247161
CHPF	0.612069	0.0247161
CORO6	-0.715412	0.0247161
ATP8A1	-0.611851	0.0247448
ZNF366	-0.440756	0.0247899
KCTD8	0.886427	0.0248196
MAPK4	-0.429726	0.0248674
NOL12	0.411226	0.0250327
GAB3	-0.327506	0.0251445
TGIF1	0.337839	0.0251522
NR4A3	1.32212	0.0251522
SLC39A11	0.327334	0.0253989
KBTBD3	-0.285106	0.0254491
VPS33A	-0.259634	0.0254491
HECW2	-0.910706	0.0254491
HIP1	-0.406481	0.0255455
STAT1	0.519065	0.0255455
PLVAP	1.0375	0.0255455
IRX2	-0.71882	0.0255681
ALOX5AP	-0.627499	0.0256387
CYP24A1	1.45646	0.0256396
TXNRD1	-0.563716	0.0258582
BTBD11	0.467813	0.0258888
TP53INP1	0.763095	0.0260504
ASB13	-0.32001	0.0261185
IL1RAPL1	0.525734	0.0261205
FBXL8	-0.34215	0.0261483
TNFSF12	-0.351991	0.0262975
SELP	0.732174	0.0263532
TRIM55	0.786087	0.0264144
PRIM1	-0.307633	0.0264144
ABCB4	0.612312	0.0265123
IFI44L	0.69242	0.0265243
UBTD1	-0.501969	0.0265243
HAS2	1.01317	0.0265243
CACNB3	0.421352	0.026535
GRN	-0.397691	0.0266095
POLDIP2	-0.249795	0.0266983
MTMR11	0.332215	0.0266983
GMDS	0.442236	0.0267702
PTPN6	-0.448209	0.0269013
ISLR	0.585821	0.0269247
GNGT2	-0.382841	0.0269247
NFKB2	0.585405	0.0270088
OCLN	-0.680421	0.0270094
ZNF696	-0.214396	0.0271241
ANKRD23	0.270449	0.0271285
PDE3A	0.742694	0.0271285
MYBPC3	-0.415998	0.0271285
CEACAM3	-0.294605	0.0271503
KCNN3	0.428688	0.0273412
MAP1A	0.707028	0.0273412
CCK	-1.10952	0.0273412
VTCN1	1.73364	0.0273412
IMP3	-0.359252	0.027345
KRTAP22-1	-0.689142	0.0273591
CRIP1	0.619946	0.027418
FZD4	-0.610539	0.0274469
ATP12A	1.02456	0.0276074
PIR	-0.337328	0.0276125
CD5L	-0.85048	0.0276682
RRAS2	0.447729	0.0277056
IFNA8	0.398893	0.0278176
ARNTL	-0.607235	0.0280553
SPDEF	0.871026	0.0280553
CASP8	-0.484799	0.0281139
MT1F	0.659573	0.0281139
CLN3	-0.423193	0.0281139
RHBDL3	0.421709	0.0281949
GLIS2	-0.595931	0.0283363
E2F7	0.620437	0.0283363
SCAMP2	-0.388342	0.0283454
WFS1	-0.516965	0.028396
ACP1	-0.293691	0.0284503
GLI2	0.386088	0.0285543
CACNA1C	0.34568	0.0286595
RENBP	-0.480517	0.0286993
GTF2E2	0.245726	0.0287717
CDKL2	-0.611355	0.0287736
OGDHL	0.939928	0.0287816
ASTN2	0.336451	0.0288126
RASSF7	-0.59052	0.0288126
RNH1	-0.303823	0.0288377
HCG9	-0.643763	0.0288377
PLN	0.753355	0.0289205
LUZP2	0.401023	0.0289743
TMEM38A	-0.413883	0.0290412
FAIM2	0.512788	0.0290554
CCNT1	0.295852	0.0291267
ABCC3	0.69864	0.0291267
SIPA1	-0.347354	0.0291267
DUSP2	0.585232	0.0292093
SMPX	0.64673	0.0292395
MMP19	0.997817	0.0292401
ARRDC2	-0.581988	0.0292853
ST6GALNAC1	1.07677	0.0292853
ACADVL	0.368202	0.0292853
COL5A1	0.822362	0.0292853
TIMP1	0.85691	0.0293031
BAIAP2	-0.376455	0.0293245
ANXA3	-0.949635	0.0294466
CCDC38	-0.677776	0.029449
DERL3	0.769623	0.029449
ADARB2	-0.609594	0.029449
CTXN1	1.10019	0.0295077
ALOX5	-0.544145	0.0296761
VSIG4	-0.76937	0.0297006
DOK3	-0.39513	0.0299682
ST3GAL5	-0.511885	0.0300566
SFTPA2	-1.26038	0.0300566
ABCA13	1.36408	0.0300566
TOP2A	0.814119	0.0300566
MAP2	-0.543989	0.0301264
SLC29A2	-0.484467	0.0301264
FNTA	-0.264312	0.0301264
SLC35A1	-0.448381	0.0302605
MSH3	0.281475	0.0303322
BGN	0.533586	0.030618
POLR3B	-0.283471	0.030618
GFRA3	0.559372	0.030676
RPL7L1	0.482446	0.0307216
KIF19	0.916454	0.0307216
GFOD1	-0.481076	0.0307486
TRIM29	0.828167	0.0307694
TNNT1	-0.697665	0.0307694
JUN	-0.730574	0.0312496
PNKD	-0.3356	0.0314366
CNTN6	-0.338308	0.0314657
NAGPA	-0.336279	0.0315026
ATG4A	-0.242552	0.0315026
PGBD1	-0.319625	0.0315026
DMRTA1	-0.423813	0.0315026
SUV39H1	-0.30573	0.0315026
RNF125	-0.456373	0.0315045
CHMP6	-0.266237	0.0316602
NSDHL	-0.331406	0.0316902
ALS2CL	-0.581189	0.0317585
TJP2	-0.388286	0.0317949
SERPINB4	1.41084	0.0319633
SESTD1	-0.427738	0.0319732
SERTAD2	0.262213	0.0319804
FPR1	-0.784226	0.0321718
BCL7B	-0.2679	0.0321726
GLYATL2	0.744073	0.0321726
TMEM41B	-0.517583	0.0322344
RGS20	0.764427	0.0323913
GLUL	-0.305879	0.0323913
FGF18	0.32421	0.0324069
ADORA2A	-0.460969	0.0324541
NAP1L4	0.254286	0.0325987
GDF15	1.08299	0.0325987
FLYWCH1	-0.34163	0.0326376
CARHSP1	-0.473787	0.0326407
ZNF436	0.341486	0.0326407
STXBP2	-0.411294	0.0326407
COMMD5	-0.235475	0.0326441
ANKS1A	-0.46722	0.03272
IFI27	-0.622551	0.03272
HAS1	1.16389	0.0329087
KHK	-0.239587	0.0329448
PRF1	-0.683851	0.0330407
GDA	0.635853	0.0330407
HAGH	-0.321175	0.0330934
PLEKHG2	0.54353	0.0330934
FBXO31	0.452791	0.0331809
CDC14B	0.498388	0.0331809
STEAP1	0.709234	0.0331809
PCDHAC2	-0.389017	0.0331848
CD4	0.426915	0.0333531
FBN1	0.573202	0.0333743
CYB5D1	0.546153	0.0334506
DNAJB12	-0.219567	0.033458
CD72	0.465775	0.0335702
DHX40	0.33857	0.0336114
FAM89B	0.359314	0.0337379
EDA2R	0.312442	0.033765
LAG3	0.420251	0.033765
WNK4	1.03602	0.033765
C15orf32	-0.709433	0.0338596
BASP1	0.612734	0.0338596
PECR	-0.398514	0.0338596
TLCD1	-0.47939	0.0338596
CXorf38	-0.250894	0.0340864
ELOVL1	-0.275829	0.0340883
GPHN	-0.258468	0.0341509
KCNA5	0.680793	0.0341509
SPTBN1	-0.45832	0.034168
EDA	-0.519895	0.0342046
DSG3	1.35386	0.0342391
SLN	1.09394	0.0342391
APOH	-1.16588	0.0342657
SEMA4C	0.356337	0.0342682
ENSA	-0.251949	0.0342703
SASH1	-0.519127	0.0343025
PGM1	-0.381001	0.0343025
DHTKD1	-0.251362	0.0343252
PRKAG1	-0.235934	0.0344152
CPT1C	0.454619	0.0346216
GNA15	0.450021	0.0347035
CD300LF	-0.704445	0.0347035
PDE4B	0.637236	0.034769
PIF1	0.381603	0.0348098
SNX1	-0.339129	0.0349006
EIF4E3	-0.413409	0.0349198
OR2A9P	-0.442775	0.0349848
ARL2BP	-0.264409	0.0349848
NEDD4L	-0.663257	0.0350868
PKN3	-0.388736	0.0350868
JSRP1	0.983778	0.0354292
MCM6	0.240885	0.0354453
SLMAP	0.318026	0.0354453
SPATA18	1.17674	0.0354676
EFNA1	-0.432649	0.0354676
CTSF	0.387954	0.0354767
EHD1	-0.411742	0.0356342
EMID1	0.479466	0.0356342
RASSF1	-0.308132	0.0356966
GCNT2	-0.353807	0.0358154
NOXO1	-0.444623	0.0358432
GPR34	-0.441238	0.0358688
SIGLEC9	-0.31609	0.0359824
AUH	-0.313064	0.0359824
HIBADH	0.299499	0.0359824
MATN2	0.506627	0.0359824
CREG1	-0.301427	0.0361833
SEMA3F	-0.482867	0.0362515
SH2D4A	-0.333513	0.0362968
AGR2	0.637809	0.036309
ITGB4	0.662044	0.036309
MEF2C	0.506604	0.036309
P2RY6	0.279885	0.036309
SPAG4	0.663481	0.0363198
MEIS3P1	0.318539	0.0363272
ALKBH6	-0.278365	0.0364226
RBM17	-0.373715	0.0364226
ARF4	0.285445	0.0364226
NELL2	1.06308	0.036611
SH2D1B	-0.667309	0.03673
ITGAL	-0.564593	0.0367871
CRLF1	0.846371	0.0368402
EPHB2	0.311829	0.0368496
SLC45A3	0.472927	0.0369077
SLC7A2	0.690012	0.0372198
SULT1A2	-0.45793	0.0372472
CXCL10	1.69489	0.0373059
TEX11	0.660992	0.0373332
NCF1	-0.520745	0.0373332
ADRA2A	0.427404	0.0374336
NKD2	-0.605303	0.0376026
PBX3	0.367404	0.0376026
DBI	-0.317597	0.0376109
CEACAM8	1.07925	0.0376109
CTH	-0.474817	0.0376558
FUT7	-0.499187	0.0378454
ICOS	0.482708	0.0378851
PCSK6	-0.508209	0.0379148
FAM107A	-1.10831	0.0379148
APOC2	0.523222	0.0379747
DDIT3	-0.392134	0.0380576
PRDX6	-0.320971	0.0381143
MAP3K14	0.31326	0.0381143
XPOT	-0.438662	0.0381856
KCNJ11	-0.865846	0.0381886
RNF128	-0.336351	0.0382388
LGR6	0.424998	0.0382963
ITGA2	0.750307	0.0384207
XKR6	-0.211712	0.0387058
KIFC3	-0.627906	0.0387058
PDLIM5	0.345582	0.0387058
PRY	0.715036	0.0387242
S100A12	-1.54706	0.0387242
CANX	-0.296662	0.0387392
DHCR24	-0.343597	0.0389202
KDR	-0.379474	0.0389276
PROM1	1.69848	0.0389276
NXF3	-0.752199	0.0390359
ST14	0.460612	0.0391071
FBLN1	0.442379	0.0392612
SPAG16	0.481814	0.0393844
NUDT6	-0.279306	0.0393844
MPG	-0.385922	0.0394826
GNG5	-0.300682	0.0395386
TMBIM4	-0.237816	0.0395386
PCP2	-0.851805	0.0395386
AMZ1	-0.511874	0.0395391
CRB3	-0.519748	0.0395391
FBXO9	-0.381118	0.0395795
PRDM7	0.743278	0.0395887
ZFP28	-0.346918	0.0397759
ABL2	0.528331	0.0397759
HLA-DOB	0.683081	0.0398121
SHANK3	-0.570086	0.0398121
DNAJC11	-0.244342	0.0399588
SHE	-0.728517	0.0399982
IVNS1ABP	0.364833	0.0400287
POP7	-0.37824	0.0400464
CYP21A2	0.33096	0.0400816
ADH7	1.41872	0.0402001
CLCA1	-0.820891	0.0402001
VIP	-0.576692	0.0402001
GIMAP5	-0.437567	0.0403003
LOXL4	0.528844	0.0404395
LTBP1	0.536656	0.0404551
EBAG9	-0.27818	0.0404551
FGF13	0.38706	0.0404708
HAMP	0.837981	0.0404708
SP6	-0.370182	0.0404708
DISP1	-0.662034	0.0405643
COL24A1	0.530558	0.040673
PRSS12	0.662455	0.0407491
NRG4	0.881635	0.0407805
SLC25A3	-0.197551	0.0407805
TMEM26	-0.551557	0.0407805
FLT4	-0.686511	0.0407805
ELMO2	-0.215909	0.0410054
IMPA2	-0.418793	0.0410054
PFKP	0.571121	0.041127
ELOVL2	0.696492	0.0412042
PXMP4	-0.594007	0.0412746
COX17	-0.371104	0.0413237
RCL1	-0.283432	0.0413237
DAB2IP	-0.304699	0.0413237
NOD1	-0.407658	0.041345
NINJ1	0.429542	0.0413532
DGKZ	-0.5197	0.0414229
PAF1	0.255523	0.0414253
XKR8	-0.246658	0.0414577
WDR24	-0.277643	0.0414577
DDX28	-0.217921	0.0414577
PFN2	0.458028	0.0414577
HES2	1.0088	0.0414577
MNDA	-0.638708	0.0415019
AADAT	-0.670616	0.0417196
GNL3	0.415928	0.041807
TUBB8	-0.816167	0.0419138
TRIM35	-0.270692	0.042049
PPIC	0.490399	0.042049
PDE2A	0.568353	0.042049
NRTN	-0.836373	0.042049
NDUFA12	-0.437969	0.042049
ERN2	1.06594	0.042049
FGD5	-0.427255	0.042049
N4BP2	0.400906	0.042049
CCNYL1	-0.322147	0.042049
FGD3	-0.471118	0.042049
CBX2	-0.284889	0.0421518
NFATC4	0.396919	0.0421634
WNT7B	0.464926	0.0421783
CD248	0.821284	0.0422334
NFATC3	-0.264321	0.0422334
TRIM10	-0.728218	0.0422334
TDRKH	-0.300553	0.0422498
CYC1	-0.243959	0.0422733
IFNA10	-0.2501	0.0423322
VPREB3	0.95661	0.0423589
WT1	0.694692	0.04236
HMG20B	0.284244	0.0424461
CNOT8	-0.51546	0.0424983
TMEM37	-0.641844	0.0425525
KLF11	-0.31884	0.0425875
CXXC5	0.431686	0.0427195
DNMT3L	-0.700714	0.042769
EDNRA	0.552597	0.0428108
TAGLN	0.568454	0.0428199
NPFFR2	0.549805	0.0428199
ARSK	-0.368143	0.0428206
PSEN2	-0.248694	0.0428206
RASL11B	0.496341	0.0428554
PDGFRL	0.665607	0.0429297
DPEP2	-0.591224	0.0430615
TNS1	-0.431583	0.0430615
GPRC5A	-0.659713	0.0431611
NRG3	-0.512729	0.0431611
PPP1R3F	-0.207346	0.0431655
HSH2D	0.460533	0.0431891
TFPI2	0.963667	0.043209
MS4A6E	1.02836	0.0432866
EVPL	-0.569892	0.0432866
CCNB3	-0.691612	0.0434312
NFKB1	0.483255	0.0434312
THAP10	-0.251661	0.0435718
CCNA1	0.895483	0.0436243
PNMA1	0.28558	0.0436243
SLAMF1	0.630941	0.0436243
GSTA1	1.51455	0.0436875
PRKD1	-0.402246	0.0436875
KLK6	0.654368	0.0436875
CDKN3	0.442596	0.0437098
IL18R1	-0.816484	0.0437098
SLC35E3	-0.358944	0.0437098
SLC16A10	0.798482	0.0437098
CST7	-0.542036	0.0437227
SIRPB1	-0.712022	0.0439293
ABCA4	0.289742	0.0439293
PROC	0.853903	0.0439293
SLC25A4	-0.290501	0.0439293
NEDD4	-0.268445	0.0439484
SDSL	0.475021	0.0440973
IRAK4	-0.289667	0.0442825
LNX2	-0.384737	0.0444114
STX10	-0.376029	0.0444114
EXTL1	0.480465	0.0444114
PSMD3	-0.261033	0.0444114
GNRH2	-0.292713	0.0445988
NINJ2	-0.581938	0.0445988
TDP1	0.270839	0.0446526
CD1C	0.519135	0.0446526
RUNX1	0.378423	0.0446526
MCRS1	-0.223404	0.0446526
CCL3L3	0.909549	0.0446864
LPP	0.377073	0.0446864
MICA	-0.64412	0.0447934
ZNF16	-0.189995	0.0447934
ACTA2	0.671224	0.044815
ITGA11	0.68511	0.0448552
GBP1	0.922611	0.045125
OSGEPL1	-0.433107	0.0452148
EIF1	-0.274596	0.0452148
PITPNM2	-0.367227	0.0454734
PPP1R13B	-0.378412	0.0455455
ARL5B	0.396001	0.0455455
SHC1	0.363752	0.0455455
CA10	-0.615483	0.0458242
SPATA20	0.57816	0.0459284
LENG1	-0.265313	0.0459284
FCHO1	-0.28885	0.04601
MACF1	-0.367192	0.0460657
C1QC	-0.536166	0.0461238
GPR26	-0.705186	0.0461316
CYP1A2	-0.952166	0.0461316
A1BG	-0.367431	0.0461992
MYO1C	-0.375827	0.0461992
FAM50B	-0.354889	0.0461992
ADCYAP1	0.729237	0.0461992
PODXL	-0.528595	0.0461992
SMOX	0.417358	0.0462221
CGB1	0.442056	0.0468269
SCN7A	-0.552136	0.0468551
GPT2	0.445566	0.0468564
CHD4	0.278838	0.0468954
CENPF	0.595636	0.0469141
PCDH1	-0.417168	0.0469141
MYOZ3	0.387851	0.0469728
SERTAD1	0.493288	0.0472124
CGNL1	-0.592209	0.0473013
C1orf56	0.236103	0.0475468
SERPINE2	0.826941	0.0475468
KCTD15	-0.304627	0.0476615
TCF3	0.270038	0.0479686
KLRF1	-1.04734	0.0479899
ANKRD13D	-0.510565	0.0480149
DOCK10	0.442688	0.0480149
OR10Q1	0.677281	0.0480172
CCL26	-0.563032	0.0480762
LTB	0.786576	0.0481056
ANKHD1	-0.418297	0.0482338
CYP3A5	-0.982675	0.0482445
HOXA5	-0.741074	0.0482445
GPA33	-0.711051	0.0483065
SNAP29	-0.309929	0.0483065
ADCY3	0.356884	0.0483065
GTPBP6	-0.261845	0.0483065
DPEP1	0.620631	0.048358
CASKIN2	-0.5951	0.0484525
CIDEC	0.809589	0.048537
TDRD10	-0.463182	0.0485632
AK3	0.296912	0.0485632
CCDC54	-0.436301	0.0487772
ZNF213	-0.276258	0.0487772
MAN1A1	0.480786	0.0487978
TMEM176B	0.507724	0.048809
GAS6	0.341485	0.0490191
PDCD1LG2	-0.97415	0.0490324
TSPAN32	-0.430959	0.0490324
HPGD	-0.973416	0.0490324
RNF38	-0.278043	0.0490324
ZNF433	-0.284374	0.0490369
EIF4EBP1	-0.333688	0.0491269
STK10	-0.305811	0.0491396
HCLS1	-0.42304	0.0491396
ZBTB3	-0.311162	0.0493451
MNS1	0.882876	0.0493888
RGL1	0.282739	0.0497833
MON1A	-0.456635	0.0498269
C1QA	-0.523889	0.0498373
EDN3	-1.01824	0.0501031
RXRG	-0.44012	0.0501031
RORC	-0.659606	0.0501031
AHRR	-0.755101	0.0502247
ACTR3B	-0.281685	0.0502532
DENR	0.401519	0.0502564
SSU72	-0.232646	0.0502831
RHOG	-0.319777	0.050352
NME4	0.337555	0.0503536
CR1	-0.486416	0.0504552
BIK	0.481518	0.0505051
ARNTL2	0.473973	0.0505422
PKHD1L1	-0.526967	0.0505422
NLGN4X	-0.716368	0.0506484
CYGB	0.416137	0.0506484
CTDSP2	-0.253348	0.0506484
LGI3	-0.973453	0.0506823
UBE2Z	0.197081	0.0506823
SYT8	0.907412	0.0506823
IL27RA	-0.274317	0.0506823
GPR83	-0.426159	0.0506823
HACE1	-0.252934	0.0506823
C3orf62	-0.299109	0.0507281
CTNNB1	0.337578	0.0507787
PPP1R3D	-0.249487	0.0507787
EFHB	0.76048	0.0508701
DNAH17	-0.652589	0.0509237
NAP1L5	0.488701	0.0510948
MRC1	-0.471298	0.0510948
C1S	0.419792	0.0513891
CACNA1B	-0.299776	0.0514196
FAM78B	0.506393	0.0514292
ULBP1	-0.59192	0.0514948
KIAA0513	-0.366323	0.0516074
COMMD9	-0.300946	0.0517255
CAMTA2	-0.326031	0.0517255
FKBP10	0.410093	0.0517255
SULT1A3	-0.23048	0.0517262
RAB9B	0.436587	0.0519752
SMPD1	-0.263527	0.0519775
SLC34A2	-0.483378	0.052182
TJP1	-0.399131	0.0523448
RAB36	0.77754	0.0523448
DNAJC12	0.358138	0.0523448
ARHGAP1	0.298987	0.0523448
IL17F	0.578377	0.0523448
GP6	-0.476748	0.0525741
TICAM2	-0.240658	0.0525967
IL17RD	0.402134	0.0525967
LRRTM2	0.777715	0.0526308
DVL1	-0.311107	0.0526487
OR2A1	-0.347855	0.0530154
NAPA	-0.267128	0.0530154
ATP8A2	-0.246866	0.0530285
STEAP3	0.570247	0.0530308
MYOM3	0.332923	0.0530308
IVD	-0.370356	0.0530308
AHR	0.397337	0.053322
MELK	0.576636	0.0533331
TMEM53	-0.251274	0.0537552
GREM1	0.745509	0.0537632
PRAM1	-0.650849	0.0538697
PCOLCE	0.486979	0.0538697
PDLIM1	0.353068	0.0540791
MEGF10	0.712665	0.0541815
EVI5L	-0.256318	0.0541815
UBOX5	-0.184357	0.0541815
SYT11	0.352815	0.0543766
ADK	-0.302443	0.0544888
ADAMTS1	0.946146	0.0544959
SLCO2B1	-0.289216	0.0545278
SLIT3	0.550851	0.0545278
RAPH1	-0.331568	0.0545408
WNT6	0.45853	0.0547822
ESPN	0.955178	0.0550027
SAG	-0.523064	0.0551821
FBXO16	0.411439	0.0551821
EBF2	0.882231	0.0551821
NUDT9	-0.263433	0.0551821
LILRB2	-0.556994	0.0552469
CHRNA5	0.279406	0.055308
RAMP1	0.656562	0.0554286
YEATS2	-0.254033	0.0556276
IL6R	-0.350403	0.0557778
PLEKHF1	-0.443645	0.055805
DPY19L2	0.462555	0.0558194
NR1D2	0.62259	0.0558373
SLC18A2	0.722295	0.0558672
RAP1A	-0.290521	0.0558672
SERHL2	-0.692053	0.0558672
LRRC4C	0.687541	0.0558672
TBC1D14	-0.280046	0.0558833
SLITRK2	-0.681139	0.0558833
KIF13A	-0.543526	0.0558833
LEP	0.479372	0.0560076
MEGF9	-0.489468	0.056095
ENPP2	0.589957	0.0561181
PSMA6	-0.265121	0.0561181
ATP6V1E1	-0.258024	0.0561181
DHPS	-0.207826	0.0561181
PLCD4	0.328053	0.0562249
PITPNM1	0.465104	0.0562249
WDR53	-0.235133	0.0562551
MGAM	-0.541918	0.0563448
SMARCD2	-0.30165	0.0570347
DTWD2	0.468778	0.0571534
LIME1	0.501516	0.0572324
CDKN2B	-0.520413	0.0573297
TRIB1	0.538701	0.057436
RFESD	-0.224776	0.0576425
SPATS2	0.329888	0.0576425
FAT2	1.20881	0.0578272
SAMD11	0.267484	0.0578272
POPDC3	-0.746138	0.0578921
DPM2	-0.325744	0.0579098
MYBPC2	0.822828	0.0579101
ZNF616	-0.261068	0.0579618
CENPM	0.479303	0.0580094
EMP1	0.669707	0.0580094
PAFAH2	-0.354869	0.0580094
KIF4A	0.677227	0.0580721
MGMT	0.412011	0.0580721
UGT1A3	-0.561766	0.0580721
TAL1	-0.41542	0.0580721
INCA1	-0.341493	0.0582925
ZNF311	-0.338137	0.0583138
RILP	-0.313027	0.0583138
AGBL2	1.15463	0.0584109
CDH22	0.550567	0.0585943
POFUT1	0.390552	0.0588327
PRSS3	0.985184	0.0589866
PHYHD1	-0.330827	0.0589866
ALDH2	-0.377136	0.0589866
HYI	-0.300233	0.0589866
KIF26B	0.871809	0.0589866
A4GALT	0.472736	0.0589866
N4BP3	-0.639414	0.0589866
GRK6	-0.284947	0.0589883
KCNAB1	0.285321	0.0589883
GLRX2	-0.225207	0.0589883
FN3KRP	-0.327769	0.0593078
ZNF442	-0.243258	0.0593078
USP11	0.266787	0.0593772
SLC2A4RG	-0.217656	0.0593772
DCUN1D3	0.436717	0.0593772
OR5A1	0.610132	0.0593791
IQCG	0.679866	0.0593791
NUBPL	0.348784	0.0593791
PDGFRB	0.42529	0.0593791
SGPL1	0.296077	0.0593937
CCRL2	-0.843215	0.0596191
C21orf91	-0.248751	0.059879
PRUNE2	0.527947	0.059879
RUFY1	-0.230471	0.059884
C11orf71	-0.35123	0.0603453
IMPDH1	-0.275701	0.0603453
C1orf21	-0.367988	0.0603453
FAM20C	0.404273	0.0604751
RNF165	0.422988	0.0604751
ITGA2B	-0.884141	0.0604751
LMAN2L	-0.300463	0.0604751
SLC6A15	-0.31783	0.0605125
XAF1	0.464908	0.0605125
QKI	-0.391499	0.0605125
TIMP4	-0.665095	0.0607105
NAIP	-0.406852	0.0607105
HPS3	-0.274497	0.0607105
FGF9	-0.499737	0.0607691
SIGLEC11	-0.694857	0.0607691
RGS1	1.06417	0.0607729
ZNF197	-0.177353	0.0608612
PTTG1	0.470777	0.0609442
SPINK1	1.00811	0.0609895
HIC2	-0.197675	0.0610285
EBI3	-0.326248	0.0611238
SH3BP4	0.333573	0.0614765
BIN1	-0.212615	0.0615433
EPB41	-0.288181	0.0615855
HPS6	-0.264889	0.0615855
HMGCL	-0.221783	0.0615855
DNALI1	0.639653	0.0616098
CXCL1	0.925561	0.061625
ITGAV	0.434661	0.061625
GRHL3	0.521574	0.061625
SLC19A1	-0.376779	0.061625
PLCB4	0.371595	0.0616573
MAPK10	0.392109	0.0616573
DNASE2	-0.316497	0.0616573
TRPM6	0.470778	0.0616573
PLCD1	-0.309763	0.0616983
RNF151	-0.591283	0.0616983
RHPN2	0.547024	0.061838
BCL11A	0.325525	0.0620066
LCN2	1.37943	0.0620329
RPL41	0.224165	0.0620365
GALNT6	0.305723	0.0620365
FCRL5	0.570123	0.0620365
HSD3B7	0.386397	0.0620695
QRICH2	-0.534563	0.0621674
SEMA3B	-0.393614	0.0621674
KIF14	0.315467	0.0621674
CLDN5	-0.730857	0.0621674
BLM	0.243573	0.0623727
PART1	0.790504	0.0623727
CEP68	0.335937	0.0623727
LRRK2	-0.78994	0.0625499
BCL2L13	-0.252554	0.0626626
PPFIA1	-0.247078	0.0627141
SLC39A8	-1.35019	0.0628083
CCL24	1.09518	0.0629687
CMKLR1	-0.327045	0.0630069
NDST1	-0.460109	0.0630409
PHACTR4	-0.245054	0.0631776
ICOSLG	0.31961	0.0631776
ACAD11	0.227695	0.0631776
LIPT1	-0.281217	0.0632025
UAP1	0.73104	0.0632469
EPHX2	0.313032	0.0636642
SHARPIN	-0.241409	0.0636642
PLAC8	-0.628173	0.0639309
CDC42EP3	-0.343565	0.0639309
CTSB	0.394378	0.0639309
HLCS	-0.388645	0.0639579
PAX9	0.744525	0.0640372
FPGS	-0.218311	0.0641103
THBS3	0.445444	0.0641217
NUB1	-0.252084	0.0641758
SLC4A3	0.449139	0.0641758
EFHC1	0.67431	0.0642403
ANLN	0.46158	0.0643029
TMIE	-0.504539	0.0643706
BTBD3	-0.263774	0.0643706
ASPM	0.561894	0.0647007
STK39	0.273854	0.0647007
GGA3	-0.264805	0.0647007
HSP90AA1	0.452416	0.0648032
GABRB1	0.480465	0.0649461
USP54	-0.334489	0.0649461
APOLD1	1.15812	0.0649461
TLK2	-0.182544	0.0650214
ATP13A4	-0.545976	0.0650764
ASB5	0.790843	0.0651011
PPP1R9B	-0.285567	0.0651011
TIPARP	0.600701	0.0652126
CCDC74A	0.894005	0.0653288
PDE5A	0.422612	0.0655091
NFIA	0.440812	0.0655091
HEMGN	-0.715398	0.0655091
TBX5	-0.557067	0.0655293
ISLR2	0.406459	0.0656668
OR1J4	-0.651848	0.0656939
HMCN1	0.577407	0.0656939
MRPL14	-0.403843	0.0657427
ADAMTS8	-0.646933	0.0657985
PRPS2	0.289543	0.0657985
DZIP1	0.352932	0.0657985
RHCG	0.576016	0.0657985
RPS19	0.318104	0.0657985
LONRF3	-0.408024	0.0657985
CHST9	1.40309	0.0657985
CX3CR1	-0.894545	0.0657985
KATNA1	-0.227167	0.0657985
SLC44A4	0.629387	0.0660532
RIPK2	0.372383	0.0660532
ABCC12	-0.258927	0.0660934
MMP12	1.26994	0.0661495
EIF2S2	-0.28087	0.0662563
TXLNA	0.295301	0.0662563
GAL3ST1	-0.494677	0.0662816
CPE	0.668054	0.0662816
PTGER1	0.678605	0.0662816
FRMD5	0.671999	0.0662816
GABARAPL1	-0.259138	0.0662873
SMAD2	-0.219816	0.0664116
PDCL	-0.298643	0.0664116
CTSH	-0.42235	0.0664116
EGFR	-0.387097	0.0665264
THOC5	-0.254486	0.066545
MFSD5	-0.272188	0.0665608
CHPT1	-0.520836	0.0665788
FABP5	-0.539177	0.0666807
LZTS1	0.494275	0.0667271
F2RL3	-1.20405	0.0668347
HCK	-0.434214	0.0668347
PRPF4	0.220283	0.0668886
ZNF365	-0.351758	0.0668886
KLC3	-0.404067	0.0668886
PPP1R2	0.243006	0.0669146
FSD1	-0.299824	0.0669146
MMACHC	-0.260768	0.0671511
ASPHD2	0.209291	0.0671511
SNORD48	0.446172	0.0671511
SV2A	0.221217	0.0671716
ZNF599	-0.532373	0.0671862
SLC27A2	0.941568	0.0671862
GAS2L2	0.69584	0.0671862
CAMTA1	-0.31943	0.0671862
G6PD	-0.287317	0.0672337
B4GALNT2	0.688514	0.0674228
FUBP3	-0.226586	0.0676795
ARRDC1	-0.343594	0.0676795
ZBTB39	-0.192003	0.0677532
VKORC1L1	-0.291012	0.0678036
HNF4G	0.575807	0.0678036
PEMT	-0.308342	0.0682139
BAALC	-0.390493	0.0683052
KCNG3	-0.648552	0.0684187
LRRC15	0.330904	0.0684187
FOSL1	0.881736	0.0684187
KCNK4	0.451953	0.0684644
PTPRT	0.818061	0.0684682
SLC11A1	-0.667038	0.0684913
STAC	-0.416156	0.0686093
JPH4	-0.377955	0.0686546
PGA3	-0.786869	0.0686546
ADCY9	-0.370714	0.0686863
AIM2	0.404435	0.0686863
RASIP1	-0.500365	0.068738
CALCOCO2	-0.354226	0.0688458
EME2	0.653895	0.0689277
CALCR	-0.426985	0.0690124
LHX2	0.728735	0.0690657
FZD2	-0.350831	0.0693086
LILRA3	-0.73991	0.0693328
GJB3	0.572747	0.069492
PRRX2	0.450812	0.0696229
PPP1R1B	-0.395542	0.0696229
EMP2	-0.470592	0.0696229
SLC25A12	0.310875	0.0696229
ARG2	0.46015	0.0696759
PON2	-0.410229	0.0702576
PDGFD	0.442651	0.070283
TRIM25	-0.246868	0.070283
KRT23	0.335191	0.0703258
OR52H1	0.677258	0.0704488
SCNM1	-0.207392	0.0705314
APOM	-0.281401	0.0705314
COL8A2	0.312421	0.0705553
HP1BP3	-0.306313	0.0706684
PKP3	-0.347196	0.0706684
HOXD12	0.238067	0.0708247
C1QTNF3	0.479556	0.0709705
TRIP6	0.253172	0.0709705
OLIG2	0.82825	0.0709915
SMOC1	0.638585	0.071058
KLHL4	0.50099	0.071058
LRP12	0.259997	0.071058
TMC7	-0.287122	0.0712277
[truncated: 11,668 more rows]
