# Supplementary material for: Transcriptomic and network analysis identifies shared and unique pathways and immune changes across fibrotic interstitial lung diseases
Source: Aging (Albany NY). 2024 Feb 12;16(4):3200–30. doi: 10.18632/aging.205530 (PMC10929820; doi:10.18632/aging.205530)
Supplement: Supplementary Table 4 [file aging-16-205530-s005.xlsx]

## Sheet: All Common Genes
Supplementary Table 4. All common differentially expressed genes of IPF, fHP and CTD-ILD.
hgnc_symbol	logFC_IPF	logFC_CHP	logFC_CTD.ILD
ACTG2	1.16867	1.06884	1.57265
AGER	-1.349	-1.422	-2.6461
ALDH1A3	1.37938	1.20394	2.0254
BAAT	1.50486	2.11337	2.15145
BTNL9	-1.42004	-1.62516	-2.34545
CA4	-1.45013	-1.58842	-2.90309
CCK	-1.12033	-2.62561	-1.10952
CCL22	1.21217	1.32231	1.46059
CD1A	1.28564	1.1963	1.30184
CD207	1.28503	1.32747	1.44838
CD24	1.35673	1.30857	1.35159
CD79A	1.10011	1.60528	1.31165
CDH3	1.55254	1.77422	1.77715
CHRM1	-1.16494	-1.45895	-1.19574
CILP2	1.43081	1.63602	1.0802
CLCA2	1.1889	1.35272	1.90154
CLDN1	1.35303	1.26599	2.03637
COL10A1	1.41114	2.15572	2.02615
COL15A1	1.32217	1.16719	2.03491
COL17A1	1.5658	3.11379	2.09906
COL1A1	1.19967	1.3694	2.09055
COL22A1	1.42887	1.08783	1.07929
COL3A1	1.16138	1.19792	1.9696
COMP	1.44021	2.18516	2.29254
CP	1.25006	1.59862	1.15131
CR2	1.12132	4.76727	1.20101
CRABP2	1.46727	1.68476	1.40604
CRTAC1	-1.22208	-1.13245	-1.66031
CSF3R	-1.23097	-1.15495	-1.05047
CST1	1.14703	4.67485	2.41316
CST2	1.32344	2.43415	2.09367
CTHRC1	1.40382	1.40712	1.98177
CTSK	1.30885	1.20946	1.27869
CXCL13	1.28943	2.5439	1.65582
CXCL14	1.44221	1.81852	1.4666
CXCL6	1.14206	1.42926	1.5131
CYP24A1	1.38184	2.9187	1.45646
DES	1.15761	1.05028	1.18699
DIO2	1.50085	4.84026	1.70243
DSG3	1.38275	1.92087	1.35386
EDNRB	-1.3005	-1.11192	-1.07601
EPAS1	-1.28413	-1.26628	-1.02231
FAM83A	1.32648	1.0039	1.36763
FCN3	-1.26412	-1.24179	-2.57438
FHL2	1.45987	1.04585	1.80809
FNDC1	1.44169	2.30747	1.39799
GALNT13	-1.56704	-1.93826	-1.23444
GJB2	1.3894	1.90585	1.44066
GRIA1	-1.33586	-1.89999	-1.23842
GRM8	-1.12127	-2.89795	-1.32328
HIF3A	-1.34821	-1.36676	-1.14455
HS6ST2	1.5381	1.29069	1.04642
HTR3C	-1.16609	-1.35576	-1.4223
IGFL1	1.41736	4.10097	1.30995
IGFL2	1.50505	4.1085	2.20639
IL13RA2	1.50104	1.65578	2.25079
ITLN2	-1.46699	-3.02658	-3.38647
KLRF1	-1.22425	-1.64204	-1.04734
KRT14	1.48071	4.79833	1.95559
KRT15	1.30519	1.82896	1.68718
KRT16	1.31863	4.60334	1.15554
KRT17	1.45527	2.38142	3.08329
KRT5	1.34519	2.3652	3.13205
KRT6A	1.27726	2.34136	2.06609
KRT6B	1.17825	2.79712	1.70233
LRRTM1	1.34461	2.86864	1.42821
MDK	1.28117	1.14997	1.49033
MEOX1	1.21941	2.47679	1.31795
MME	-1.32923	-1.33765	-1.17964
MMP1	1.41926	2.36945	2.52411
MMP10	1.25697	1.8552	1.9254
MMP11	1.49021	1.87211	1.88099
MMP13	1.48302	3.44615	1.25286
MMP7	1.51474	2.29675	2.82787
NDRG4	-1.22391	-1.41715	-1.3173
PCP4	1.3977	3.49109	1.9173
PDLIM4	1.42251	1.49838	1.23592
PNMT	-1.16583	-1.06349	-1.53618
POSTN	1.34103	1.42997	1.7185
POU2AF1	1.27478	1.2654	1.21263
PRX	-1.35922	-1.27536	-1.60626
PTPRB	-1.36952	-1.02877	-1.20803
RGS9BP	-1.25616	-1.09809	-1.29897
RS1	-1.33465	-1.05538	-1.72488
SCG5	1.49102	2.95978	1.4586
SERPINB5	1.36125	2.42068	1.99447
SERPIND1	1.24819	1.53196	1.96176
SFRP2	1.38283	1.55745	2.37095
SLC28A3	1.28073	1.02552	1.74313
SLC6A4	-1.17726	-2.32366	-2.33924
SLCO1A2	-1.36254	-3.28362	-1.11893
SLN	1.20044	1.62301	1.09394
SPP1	1.20158	1.49184	2.97845
SPRR1A	1.33789	4.26712	1.13264
STXBP6	-1.33748	-1.52101	-1.18406
SULF1	1.43755	1.07368	1.70103
THBS2	1.1871	1.06521	1.68327
THY1	1.33451	1.86941	2.74004
TMEM100	-1.18507	-1.2949	-2.36464
TRPV6	1.35762	1.15224	1.20221
TUBB3	1.36741	2.53275	1.30449
UCN2	1.33588	1.31906	1.13027
UGT1A6	1.32118	2.82876	1.58715
VIPR1	-1.23025	-1.70707	-2.3009
WNT10A	1.37899	1.45352	1.52636
