# Supplementary material for: Transcriptomic and network analysis identifies shared and unique pathways and immune changes across fibrotic interstitial lung diseases
Source: Aging (Albany NY). 2024 Feb 12;16(4):3200–30. doi: 10.18632/aging.205530 (PMC10929820; doi:10.18632/aging.205530)
Supplement: Supplementary Table 7 [file aging-16-205530-s007.xlsx]

## Sheet: GO Enrichment Analysis of Up-re
Supplementary Table 7. Gene ontology enrichment analysis of up-regulated common differentially expressed genes.
ONTOLOGY	ID	Description	GeneRatio	BgRatio	pvalue	p.adjust	qvalue	geneID	Count
BP	GO:0030198	extracellular matrix organization	17/72	266/12639	9.0075e-14	5.01678e-11	4.39182e-11	COL1A1/COL10A1/SERPINB5/COMP/COL15A1/MMP11/CTSK/COL22A1/MMP13/COL17A1/SFRP2/COL3A1/MMP1/SULF1/MMP10/POSTN/MMP7	17
BP	GO:0043062	extracellular structure organization	17/72	267/12639	9.5798e-14	5.01678e-11	4.39182e-11	COL1A1/COL10A1/SERPINB5/COMP/COL15A1/MMP11/CTSK/COL22A1/MMP13/COL17A1/SFRP2/COL3A1/MMP1/SULF1/MMP10/POSTN/MMP7	17
BP	GO:0045229	external encapsulating structure organization	17/72	269/12639	1.08276e-13	5.01678e-11	4.39182e-11	COL1A1/COL10A1/SERPINB5/COMP/COL15A1/MMP11/CTSK/COL22A1/MMP13/COL17A1/SFRP2/COL3A1/MMP1/SULF1/MMP10/POSTN/MMP7	17
BP	GO:0030574	collagen catabolic process	6/72	40/12639	9.10469e-08	3.16388e-05	2.76974e-05	MMP11/CTSK/MMP13/MMP1/MMP10/MMP7	6
BP	GO:0032963	collagen metabolic process	7/72	84/12639	4.61902e-07	0.000128409	0.000112412	COL1A1/MMP11/CTSK/MMP13/MMP1/MMP10/MMP7	7
BP	GO:0022617	extracellular matrix disassembly	6/72	57/12639	7.97599e-07	0.000184777	0.000161759	MMP11/CTSK/MMP13/MMP1/MMP10/MMP7	6
BP	GO:0008544	epidermis development	10/72	265/12639	2.36671e-06	0.000469961	0.000411416	WNT10A/CDH3/CRABP2/COL17A1/KRT16/KRT15/KRT17/KRT5/SPRR1A/KRT14	10
BP	GO:0043588	skin development	9/72	231/12639	6.09355e-06	0.00105876	0.000926862	COL1A1/WNT10A/CDH3/COMP/KRT16/CLDN1/COL3A1/KRT17/SPRR1A	9
BP	GO:0030199	collagen fibril organization	5/72	52/12639	1.09989e-05	0.00169872	0.0014871	COL1A1/COMP/MMP11/SFRP2/COL3A1	5
BP	GO:0001503	ossification	10/72	345/12639	2.40182e-05	0.00333853	0.00292264	COL1A1/COMP/CTSK/MMP13/FHL2/CYP24A1/SFRP2/MDK/CTHRC1/SPP1	10
BP	GO:0051216	cartilage development	7/72	163/12639	3.80162e-05	0.00480386	0.00420543	COL1A1/COMP/CTSK/MMP13/SFRP2/SULF1/MDK	7
BP	GO:0045103	intermediate filament-based process	4/72	38/12639	6.17232e-05	0.00659964	0.00577749	DES/KRT16/KRT17/KRT14	4
BP	GO:0045104	intermediate filament cytoskeleton organization	4/72	38/12639	6.17232e-05	0.00659964	0.00577749	DES/KRT16/KRT17/KRT14	4
BP	GO:0045109	intermediate filament organization	3/72	18/12639	0.000136035	0.0127443	0.0111567	DES/KRT17/KRT14	3
BP	GO:0042303	molting cycle	5/72	89/12639	0.000149212	0.0127443	0.0111567	WNT10A/CDH3/KRT16/KRT17/KRT14	5
BP	GO:0042633	hair cycle	5/72	89/12639	0.000149212	0.0127443	0.0111567	WNT10A/CDH3/KRT16/KRT17/KRT14	5
BP	GO:0031424	keratinization	4/72	48/12639	0.000155865	0.0127443	0.0111567	CDH3/KRT16/KRT17/SPRR1A	4
BP	GO:0002009	morphogenesis of an epithelium	10/72	439/12639	0.000179765	0.0138819	0.0121526	WNT10A/SERPINB5/KRT6A/KRT16/SFRP2/ALDH1A3/SULF1/MDK/KRT17/CTHRC1	10
BP	GO:0061448	connective tissue development	7/72	217/12639	0.00022828	0.0167005	0.01462	COL1A1/COMP/CTSK/MMP13/SFRP2/SULF1/MDK	7
BP	GO:0002063	chondrocyte development	3/72	24/12639	0.000329243	0.0224087	0.0196172	COMP/SFRP2/SULF1	3
BP	GO:0009611	response to wounding	10/72	475/12639	0.000338549	0.0224087	0.0196172	COL1A1/CDH3/SERPIND1/COMP/KRT6A/CLDN1/COL3A1/MDK/POSTN/SPP1	10
BP	GO:0061844	antimicrobial humoral immune response mediated by antimicrobial peptide	4/72	60/12639	0.000371016	0.0230659	0.0201925	CXCL6/CXCL13/KRT6A/CXCL14	4
BP	GO:0031099	regeneration	6/72	168/12639	0.000381666	0.0230659	0.0201925	THY1/CLDN1/MDK/POSTN/BAAT/SPP1	6
BP	GO:0060351	cartilage development involved in endochondral bone morphogenesis	3/72	29/12639	0.000582381	0.0337296	0.0295277	COL1A1/COMP/MMP13	3
BP	GO:0071295	cellular response to vitamin	3/72	30/12639	0.000644454	0.0358317	0.031368	COL1A1/CYP24A1/POSTN	3
BP	GO:0001649	osteoblast differentiation	6/72	188/12639	0.000692199	0.037006	0.032396	COL1A1/FHL2/CYP24A1/SFRP2/CTHRC1/SPP1	6
BP	GO:0001501	skeletal system development	9/72	436/12639	0.000789082	0.03942	0.0345093	COL1A1/COL10A1/COMP/CTSK/MMP13/SFRP2/COL3A1/SULF1/MDK	9
BP	GO:0042445	hormone metabolic process	6/72	193/12639	0.000794072	0.03942	0.0345093	CRABP2/CTSK/DIO2/ALDH1A3/SCG5/SPP1	6
BP	GO:0042060	wound healing	8/72	366/12639	0.00108871	0.0499316	0.0437114	COL1A1/CDH3/SERPIND1/COMP/KRT6A/CLDN1/COL3A1/POSTN	8
BP	GO:0046849	bone remodeling	4/72	80/12639	0.00110461	0.0499316	0.0437114	CTSK/MDK/CTHRC1/SPP1	4
BP	GO:0006959	humoral immune response	6/72	206/12639	0.00111358	0.0499316	0.0437114	CXCL6/CXCL13/POU2AF1/KRT6A/CR2/CXCL14	6
CC	GO:0031012	extracellular matrix	19/75	499/13097	3.074e-11	2.38653e-09	2.19393e-09	COL1A1/COL10A1/COMP/COL15A1/THBS2/MMP11/LRRTM1/COL22A1/MMP13/COL17A1/SFRP2/COL3A1/MMP1/SULF1/MMP10/MDK/POSTN/CTHRC1/MMP7	19
CC	GO:0030312	external encapsulating structure	19/75	500/13097	3.18204e-11	2.38653e-09	2.19393e-09	COL1A1/COL10A1/COMP/COL15A1/THBS2/MMP11/LRRTM1/COL22A1/MMP13/COL17A1/SFRP2/COL3A1/MMP1/SULF1/MMP10/MDK/POSTN/CTHRC1/MMP7	19
CC	GO:0005581	collagen trimer	7/75	77/13097	2.65008e-07	1.32504e-05	1.21811e-05	COL1A1/COL10A1/COL15A1/COL22A1/COL17A1/COL3A1/CTHRC1	7
CC	GO:0005882	intermediate filament	8/75	133/13097	8.7216e-07	3.2706e-05	3.00666e-05	DES/KRT6A/KRT16/KRT15/KRT17/KRT5/KRT6B/KRT14	8
CC	GO:0062023	collagen-containing extracellular matrix	12/75	382/13097	1.58778e-06	4.76333e-05	4.37892e-05	COL1A1/COL10A1/COMP/COL15A1/THBS2/COL17A1/SFRP2/COL3A1/SULF1/MDK/POSTN/CTHRC1	12
CC	GO:0045111	intermediate filament cytoskeleton	8/75	168/13097	5.0417e-06	0.000126043	0.000115871	DES/KRT6A/KRT16/KRT15/KRT17/KRT5/KRT6B/KRT14	8
CC	GO:0005788	endoplasmic reticulum lumen	9/75	265/13097	1.94169e-05	0.000416076	0.000382498	COL1A1/COL10A1/SERPIND1/COL15A1/COL22A1/COL17A1/CP/COL3A1/SPP1	9
CC	GO:0045095	keratin filament	4/75	52/13097	0.00021808	0.004089	0.00375901	KRT6A/KRT5/KRT6B/KRT14	4
CC	GO:0005583	fibrillar collagen trimer	2/75	12/13097	0.00205772	0.0308658	0.0283749	COL1A1/COL3A1	2
CC	GO:0098643	banded collagen fibril	2/75	12/13097	0.00205772	0.0308658	0.0283749	COL1A1/COL3A1	2
MF	GO:0005201	extracellular matrix structural constituent	10/73	154/12942	1.38739e-08	1.68271e-06	1.37197e-06	COL1A1/COL10A1/COMP/COL15A1/THBS2/COL22A1/COL17A1/COL3A1/POSTN/CTHRC1	10
MF	GO:0005200	structural constituent of cytoskeleton	8/73	83/12942	1.94533e-08	1.68271e-06	1.37197e-06	TUBB3/DES/KRT6A/KRT16/KRT15/KRT5/KRT6B/KRT14	8
MF	GO:0005539	glycosaminoglycan binding	9/73	191/12942	1.18303e-06	5.20628e-05	4.24485e-05	CXCL6/CXCL13/SERPIND1/COMP/THBS2/SULF1/MDK/POSTN/MMP7	9
MF	GO:0008201	heparin binding	8/73	141/12942	1.20376e-06	5.20628e-05	4.24485e-05	CXCL6/CXCL13/SERPIND1/COMP/THBS2/MDK/POSTN/MMP7	8
MF	GO:0030020	extracellular matrix structural constituent conferring tensile strength	5/73	37/12942	1.88202e-06	6.51178e-05	5.30927e-05	COL1A1/COL10A1/COL15A1/COL17A1/COL3A1	5
MF	GO:0004222	metalloendopeptidase activity	6/73	102/12942	2.29529e-05	0.000661807	0.000539593	MMP11/MMP13/CLCA2/MMP1/MMP10/MMP7	6
MF	GO:1901681	sulfur compound binding	8/73	224/12942	3.63127e-05	0.000897441	0.000731714	CXCL6/CXCL13/SERPIND1/COMP/THBS2/MDK/POSTN/MMP7	8
MF	GO:0008009	chemokine activity	4/73	43/12942	9.73421e-05	0.00210502	0.00171629	CXCL6/CXCL13/CCL22/CXCL14	4
MF	GO:0004252	serine-type endopeptidase activity	6/73	136/12942	0.00011521	0.00221459	0.00180563	MMP11/CTSK/MMP13/MMP1/MMP10/MMP7	6
MF	GO:0008236	serine-type peptidase activity	6/73	151/12942	0.000204242	0.00353339	0.00288089	MMP11/CTSK/MMP13/MMP1/MMP10/MMP7	6
MF	GO:0017171	serine hydrolase activity	6/73	154/12942	0.000227248	0.003574	0.002914	MMP11/CTSK/MMP13/MMP1/MMP10/MMP7	6
MF	GO:0042379	chemokine receptor binding	4/73	57/12942	0.000293564	0.00397492	0.00324088	CXCL6/CXCL13/CCL22/CXCL14	4
MF	GO:0008237	metallopeptidase activity	6/73	162/12942	0.000298693	0.00397492	0.00324088	MMP11/MMP13/CLCA2/MMP1/MMP10/MMP7	6
MF	GO:0048018	receptor ligand activity	9/73	416/12942	0.000527533	0.0062894	0.00512796	CXCL6/WNT10A/CXCL13/UCN2/CCL22/SFRP2/CXCL14/MDK/SPP1	9
MF	GO:0001664	G protein-coupled receptor binding	7/73	253/12942	0.000545324	0.0062894	0.00512796	CXCL6/WNT10A/CXCL13/UCN2/CCL22/CXCL14/CTHRC1	7
MF	GO:0030546	signaling receptor activator activity	9/73	424/12942	0.000605078	0.00654241	0.00533424	CXCL6/WNT10A/CXCL13/UCN2/CCL22/SFRP2/CXCL14/MDK/SPP1	9
MF	GO:0005178	integrin binding	5/73	130/12942	0.000823357	0.00837887	0.00683157	COMP/THY1/SFRP2/COL3A1/SPP1	5
MF	GO:0030545	signaling receptor regulator activity	9/73	450/12942	0.00092439	0.00888441	0.00724375	CXCL6/WNT10A/CXCL13/UCN2/CCL22/SFRP2/CXCL14/MDK/SPP1	9
MF	GO:0005125	cytokine activity	6/73	206/12942	0.00106075	0.00965837	0.00787479	CXCL6/WNT10A/CXCL13/CCL22/CXCL14/SPP1	6
MF	GO:0048407	platelet-derived growth factor binding	2/73	11/12942	0.00167012	0.0144466	0.0117788	COL1A1/COL3A1	2
MF	GO:0061135	endopeptidase regulator activity	5/73	167/12942	0.00249565	0.0205594	0.0167628	SERPINB5/CST1/SERPIND1/SFRP2/CST2	5
MF	GO:0004175	endopeptidase activity	7/73	341/12942	0.00304251	0.0239252	0.019507	MMP11/CTSK/MMP13/CLCA2/MMP1/MMP10/MMP7	7
MF	GO:0045236	CXCR chemokine receptor binding	2/73	16/12942	0.00357803	0.026913	0.0219431	CXCL6/CXCL13	2
MF	GO:0005518	collagen binding	3/73	60/12942	0.00468007	0.0337355	0.0275057	COMP/CTSK/MMP13	3
MF	GO:0061134	peptidase regulator activity	5/73	197/12942	0.00505248	0.0349632	0.0285066	SERPINB5/CST1/SERPIND1/SFRP2/CST2	5
MF	GO:0001968	fibronectin binding	2/73	23/12942	0.00735394	0.048932	0.0398959	CTSK/SFRP2	2
