# Supplementary material for: Transcriptomic and network analysis identifies shared and unique pathways and immune changes across fibrotic interstitial lung diseases
Source: Aging (Albany NY). 2024 Feb 12;16(4):3200–30. doi: 10.18632/aging.205530 (PMC10929820; doi:10.18632/aging.205530)
Supplement: Supplementary Table 8 [file aging-16-205530-s008.xlsx]

## Sheet: GO Enrichment Analysis of Down-
Supplementary Table 8. Gene ontology enrichment analysis of down-regulated common differentially expressed genes.
ONTOLOGY	ID	Description	GeneRatio	BgRatio	pvalue	p.adjust	qvalue	geneID	Count
BP	GO:0050890	cognition	7/28	255/12639	1.03303187397151E-06	0.00081196305294161	0.000641567163834941	AGER/CCK/SLC6A4/CHRM1/GRIA1/MME/NDRG4	7
BP	GO:0007611	learning or memory	6/28	224/12639	7.87852794620746E-06	0.00309626148285953	0.00244649025698021	AGER/CCK/SLC6A4/GRIA1/MME/NDRG4	6
BP	GO:0051930	regulation of sensory perception of pain	3/28	30/12639	0.0000379823470875627	0.00660075676731805	0.00521554371597382	EDNRB/CCK/TMEM100	3
BP	GO:0019233	sensory perception of pain	4/28	88/12639	0.0000395382085484	0.00660075676731805	0.00521554371597382	EDNRB/CCK/TMEM100/MME	4
BP	GO:0051931	regulation of sensory perception	3/28	31/12639	0.0000419895468658909	0.00660075676731805	0.00521554371597382	EDNRB/CCK/TMEM100	3
BP	GO:0009416	response to light stimulus	5/28	277/12639	0.000316946467651507	0.0361077995637258	0.0285303358009886	CCK/RS1/MME/RGS9BP/NDRG4	5
BP	GO:0050805	negative regulation of synaptic transmission	3/28	61/12639	0.000321570734028092	0.0361077995637258	0.0285303358009886	AGER/SLC6A4/GRIA1	3
MF	GO:0042277	peptide binding	5/28	266/12942	0.000235634614710614	0.0296899614535374	0.0195948784864616	AGER/EDNRB/GRIA1/VIPR1/MME	5
MF	GO:0033218	amide binding	5/28	333/12942	0.000660638210062437	0.0386123429016015	0.0254835011631288	AGER/EDNRB/GRIA1/VIPR1/MME	5
MF	GO:0030246	carbohydrate binding	4/28	214/12942	0.00108989465908029	0.0386123429016015	0.0254835011631288	GALNT13/KLRF1/FCN3/ITLN2	4
MF	GO:0030594	neurotransmitter receptor activity	3/28	104/12942	0.0014269823828791	0.0386123429016015	0.0254835011631288	HTR3C/CHRM1/GRIA1	3
MF	GO:0008066	glutamate receptor activity	2/28	27/12942	0.00153223582942863	0.0386123429016015	0.0254835011631288	GRM8/GRIA1	2
