# Supplementary material for: Transcriptomic and network analysis identifies shared and unique pathways and immune changes across fibrotic interstitial lung diseases
Source: Aging (Albany NY). 2024 Feb 12;16(4):3200–30. doi: 10.18632/aging.205530 (PMC10929820; doi:10.18632/aging.205530)
Supplement: Supplementary Table 9 [file aging-16-205530-s009.xlsx]

## Sheet: KEGG Enrichment Analysis of Up-
Supplementary Table 9. KEGG enrichment analysis of up-regulated common differentially expressed genes.
ID	Description	GeneRatio	BgRatio	pvalue	p.adjust	qvalue	geneID	Count
R-HSA-1442490	Collagen degradation	11/58	57/8807	5.44353e-14	1.06693e-11	9.33995e-12	COL1A1/COL10A1/COL15A1/MMP11/CTSK/MMP13/COL17A1/COL3A1/MMP1/MMP10/MMP7	11
R-HSA-1474228	Degradation of the extracellular matrix	12/58	127/8807	2.43016e-11	2.38155e-09	2.08482e-09	COL1A1/COL10A1/COL15A1/MMP11/CTSK/MMP13/COL17A1/COL3A1/MMP1/MMP10/MMP7/SPP1	12
R-HSA-1474244	Extracellular matrix organization	14/58	276/8807	1.86889e-09	1.22101e-07	1.06887e-07	COL1A1/COL10A1/COMP/COL15A1/MMP11/CTSK/COL22A1/MMP13/COL17A1/COL3A1/MMP1/MMP10/MMP7/SPP1	14
R-HSA-6809371	Formation of the cornified envelope	9/58	90/8807	5.71762e-09	2.80163e-07	2.45256e-07	DSG3/KRT6A/KRT16/KRT15/KRT17/KRT5/KRT6B/SPRR1A/KRT14	9
R-HSA-1474290	Collagen formation	8/58	76/8807	2.86132e-08	1.12164e-06	9.81886e-07	COL1A1/COL10A1/COL15A1/COL22A1/MMP13/COL17A1/COL3A1/MMP7	8
R-HSA-1592389	Activation of Matrix Metalloproteinases	6/58	31/8807	4.05713e-08	1.32533e-06	1.1602e-06	MMP11/CTSK/MMP13/MMP1/MMP10/MMP7	6
R-HSA-2022090	Assembly of collagen fibrils and other multimeric structures	7/58	55/8807	5.87599e-08	1.64528e-06	1.44028e-06	COL1A1/COL10A1/COL15A1/MMP13/COL17A1/COL3A1/MMP7	7
R-HSA-8948216	Collagen chain trimerization	6/58	39/8807	1.72626e-07	4.22934e-06	3.70237e-06	COL1A1/COL10A1/COL15A1/COL22A1/COL17A1/COL3A1	6
R-HSA-6805567	Keratinization	9/58	147/8807	4.17646e-07	9.0954e-06	7.96214e-06	DSG3/KRT6A/KRT16/KRT15/KRT17/KRT5/KRT6B/SPRR1A/KRT14	9
R-HSA-1650814	Collagen biosynthesis and modifying enzymes	6/58	56/8807	1.5759e-06	3.08877e-05	2.70392e-05	COL1A1/COL10A1/COL15A1/COL22A1/COL17A1/COL3A1	6
R-HSA-446107	Type I hemidesmosome assembly	3/58	10/8807	3.14824e-05	0.00056096	0.000491066	COL17A1/KRT5/KRT14	3
R-HSA-446728	Cell junction organization	5/58	78/8807	0.000152029	0.00248314	0.00217375	CDH3/COL17A1/CLDN1/KRT5/KRT14	5
R-HSA-216083	Integrin cell surface interactions	5/58	82/8807	0.000192593	0.00290372	0.00254192	COL1A1/COL10A1/COMP/COL3A1/SPP1	5
R-HSA-1500931	Cell-Cell communication	5/58	111/8807	0.000782438	0.0109541	0.00958928	CDH3/COL17A1/CLDN1/KRT5/KRT14	5
R-HSA-190872	Transport of connexons to the plasma membrane	2/58	11/8807	0.00225674	0.029488	0.0258139	TUBB3/GJB2	2
R-HSA-380108	Chemokine receptors bind chemokines	3/58	47/8807	0.00357909	0.0438439	0.038381	CXCL6/CXCL13/CCL22	3
R-HSA-186797	Signaling by PDGF	3/58	56/8807	0.00586812	0.0640108	0.0560352	THBS2/COL3A1/SPP1	3
R-HSA-3000480	Scavenging by Class A Receptors	2/58	18/8807	0.00609484	0.0640108	0.0560352	COL1A1/COL3A1	2
R-HSA-381426	Regulation of Insulin-like Growth Factor (IGF) transport and uptake by Insulin-like Growth Factor Binding Proteins (IGFBPs)	4/58	112/8807	0.00620513	0.0640108	0.0560352	SERPIND1/CP/MMP1/SPP1	4
R-HSA-3000171	Non-integrin membrane-ECM interactions	3/58	59/8807	0.00678685	0.0665112	0.0582241	COL1A1/COL10A1/COL3A1	3
R-HSA-198933	Immunoregulatory interactions between a Lymphoid and a non-Lymphoid cell	4/58	117/8807	0.00722945	0.0674748	0.0590677	COL1A1/COL17A1/CD1A/COL3A1	4
R-HSA-190861	Gap junction assembly	2/58	23/8807	0.00986825	0.0879171	0.0769629	TUBB3/GJB2	2
R-HSA-3000178	ECM proteoglycans	3/58	70/8807	0.0108607	0.0925523	0.0810205	COL1A1/COMP/COL3A1	3
R-HSA-3000170	Syndecan interactions	2/58	27/8807	0.0134624	0.109943	0.096244	COL1A1/COL3A1	2
R-HSA-8874081	MET activates PTK2 signaling	2/58	30/8807	0.0164753	0.129166	0.113072	COL1A1/COL3A1	2
R-HSA-190828	Gap junction trafficking	2/58	34/8807	0.0208941	0.15751	0.137884	TUBB3/GJB2	2
R-HSA-157858	Gap junction trafficking and regulation	2/58	36/8807	0.0232684	0.168911	0.147866	TUBB3/GJB2	2
R-HSA-8957275	Post-translational protein phosphorylation	3/58	96/8807	0.0251487	0.174023	0.15234	SERPIND1/CP/SPP1	3
R-HSA-2173782	Binding and Uptake of Ligands by Scavenger Receptors	2/58	38/8807	0.0257483	0.174023	0.15234	COL1A1/COL3A1	2
R-HSA-6785807	Interleukin-4 and Interleukin-13 signaling	3/58	100/8807	0.0279438	0.182566	0.159819	IL13RA2/CCL22/MMP1	3
R-HSA-8875878	MET promotes cell motility	2/58	41/8807	0.0296596	0.187526	0.16416	COL1A1/COL3A1	2
R-HSA-5362517	Signaling by Retinoic Acid	2/58	42/8807	0.031013	0.189954	0.166287	CRABP2/ALDH1A3	2
R-HSA-421270	Cell-cell junction organization	2/58	53/8807	0.0474147	0.281615	0.246526	CDH3/CLDN1	2
R-HSA-1679131	Trafficking and processing of endosomal TLR	1/58	10/8807	0.0639706	0.329954	0.288842	CTSK	1
R-HSA-190840	Microtubule-dependent trafficking of connexons from Golgi to the plasma membrane	1/58	10/8807	0.0639706	0.329954	0.288842	TUBB3	1
R-HSA-351906	Apoptotic cleavage of cell adhesion proteins	1/58	10/8807	0.0639706	0.329954	0.288842	DSG3	1
R-HSA-430116	GP1b-IX-V activation signalling	1/58	10/8807	0.0639706	0.329954	0.288842	COL1A1	1
R-HSA-83936	Transport of nucleosides and free purine and pyrimidine bases across the plasma membrane	1/58	10/8807	0.0639706	0.329954	0.288842	SLC28A3	1
R-HSA-196791	Vitamin D (calciferol) metabolism	1/58	11/8807	0.070142	0.352509	0.308587	CYP24A1	1
R-HSA-389977	Post-chaperonin tubulin folding pathway	1/58	12/8807	0.0762734	0.37374	0.327173	TUBB3	1
R-HSA-983712	Ion channel transport	3/58	154/8807	0.0806819	0.38437	0.336479	SLN/CLCA2/TRPV6	3
R-HSA-75892	Platelet Adhesion to exposed collagen	1/58	13/8807	0.0823651	0.38437	0.336479	COL1A1	1
R-HSA-6806834	Signaling by MET	2/58	78/8807	0.0932067	0.405677	0.35513	COL1A1/COL3A1	2
R-HSA-2214320	Anchoring fibril formation	1/58	15/8807	0.0944302	0.405677	0.35513	COL1A1	1
R-HSA-3772470	Negative regulation of TCF-dependent signaling by WNT ligand antagonists	1/58	15/8807	0.0944302	0.405677	0.35513	SFRP2	1
R-HSA-375276	Peptide ligand-binding receptors	3/58	166/8807	0.0958687	0.405677	0.35513	CXCL6/CXCL13/CCL22	3
R-HSA-2672351	Stimuli-sensing channels	2/58	80/8807	0.0972796	0.405677	0.35513	CLCA2/TRPV6	2
R-HSA-159418	Recycling of bile acids and salts	1/58	16/8807	0.100404	0.409984	0.358901	BAAT	1
R-HSA-209776	Metabolism of amine-derived hormones	1/58	17/8807	0.106339	0.41685	0.364912	DIO2	1
R-HSA-389960	Formation of tubulin folding intermediates by CCT/TriC	1/58	17/8807	0.106339	0.41685	0.364912	TUBB3	1
R-HSA-373080	Class B/2 (Secretin family receptors)	2/58	86/8807	0.109792	0.417563	0.365536	WNT10A/UCN2	2
R-HSA-2243919	Crosslinking of collagen fibrils	1/58	18/8807	0.112236	0.417563	0.365536	COL1A1	1
R-HSA-500792	GPCR ligand binding	5/58	390/8807	0.112912	0.417563	0.365536	CXCL6/WNT10A/CXCL13/UCN2/CCL22	5
R-HSA-397014	Muscle contraction	3/58	181/8807	0.116364	0.420864	0.368426	ACTG2/DES/SLN	3
R-HSA-140837	Intrinsic Pathway of Fibrin Clot Formation	1/58	20/8807	0.123915	0.420864	0.368426	SERPIND1	1
R-HSA-2979096	NOTCH2 Activation and Transmission of Signal to the Nucleus	1/58	20/8807	0.123915	0.420864	0.368426	MDK	1
R-HSA-9668328	Sealing of the nuclear envelope (NE) by ESCRT-III	1/58	20/8807	0.123915	0.420864	0.368426	TUBB3	1
R-HSA-140875	Common Pathway of Fibrin Clot Formation	1/58	21/8807	0.129698	0.420864	0.368426	SERPIND1	1
R-HSA-5365859	RA biosynthesis pathway	1/58	21/8807	0.129698	0.420864	0.368426	ALDH1A3	1
R-HSA-9619483	Activation of AMPK downstream of NMDARs	1/58	21/8807	0.129698	0.420864	0.368426	TUBB3	1
R-HSA-156588	Glucuronidation	1/58	22/8807	0.135443	0.420864	0.368426	UGT1A6	1
R-HSA-389957	Prefoldin mediated transfer of substrate to CCT/TriC	1/58	22/8807	0.135443	0.420864	0.368426	TUBB3	1
R-HSA-8940973	RUNX2 regulates osteoblast differentiation	1/58	23/8807	0.141151	0.420864	0.368426	COL1A1	1
R-HSA-2132295	MHC class II antigen presentation	2/58	101/8807	0.142724	0.420864	0.368426	TUBB3/CTSK	2
R-HSA-193368	Synthesis of bile acids and bile salts via 7alpha-hydroxycholesterol	1/58	24/8807	0.146822	0.420864	0.368426	BAAT	1
R-HSA-389958	Cooperation of Prefoldin and TriC/CCT in actin and tubulin folding	1/58	24/8807	0.146822	0.420864	0.368426	TUBB3	1
R-HSA-5626467	RHO GTPases activate IQGAPs	1/58	24/8807	0.146822	0.420864	0.368426	TUBB3	1
R-HSA-210991	Basigin interactions	1/58	25/8807	0.152456	0.420864	0.368426	MMP1	1
R-HSA-3238698	WNT ligand biogenesis and trafficking	1/58	25/8807	0.152456	0.420864	0.368426	WNT10A	1
R-HSA-418990	Adherens junctions interactions	1/58	25/8807	0.152456	0.420864	0.368426	CDH3	1
R-HSA-425410	Metal ion SLC transporters	1/58	25/8807	0.152456	0.420864	0.368426	CP	1
R-HSA-420029	Tight junction interactions	1/58	26/8807	0.158054	0.42758	0.374305	CLDN1	1
R-HSA-201556	Signaling by ALK	1/58	27/8807	0.163615	0.42758	0.374305	MDK	1
R-HSA-3295583	TRP channels	1/58	27/8807	0.163615	0.42758	0.374305	TRPV6	1
R-HSA-8955332	Carboxyterminal post-translational modifications of tubulin	1/58	27/8807	0.163615	0.42758	0.374305	TUBB3	1
R-HSA-8878166	Transcriptional regulation by RUNX2	2/58	112/8807	0.168048	0.430498	0.376859	COL1A1/MMP13	2
R-HSA-1980145	Signaling by NOTCH2	1/58	28/8807	0.16914	0.430498	0.376859	MDK	1
R-HSA-9006931	Signaling by Nuclear Receptors	3/58	217/8807	0.171321	0.430498	0.376859	CRABP2/ALDH1A3/MMP7	3
R-HSA-8941326	RUNX2 regulates bone development	1/58	30/8807	0.180083	0.432151	0.378306	COL1A1	1
R-HSA-983695	Antigen activates B Cell Receptor (BCR) leading to generation of second messengers	1/58	30/8807	0.180083	0.432151	0.378306	CD79A	1
R-HSA-2022928	HS-GAG biosynthesis	1/58	31/8807	0.185501	0.432151	0.378306	HS6ST2	1
R-HSA-9646399	Aggrephagy	1/58	31/8807	0.185501	0.432151	0.378306	TUBB3	1
R-HSA-5083635	Defective B3GALTL causes Peters-plus syndrome (PpS)	1/58	32/8807	0.190884	0.432151	0.378306	THBS2	1
R-HSA-5579029	Metabolic disorders of biological oxidation enzymes	1/58	32/8807	0.190884	0.432151	0.378306	CYP24A1	1
R-HSA-5620924	Intraflagellar transport	1/58	32/8807	0.190884	0.432151	0.378306	TUBB3	1
R-HSA-114604	GPVI-mediated activation cascade	1/58	33/8807	0.196232	0.432151	0.378306	COL1A1	1
R-HSA-445355	Smooth Muscle Contraction	1/58	33/8807	0.196232	0.432151	0.378306	ACTG2	1
R-HSA-5173214	O-glycosylation of TSR domain-containing proteins	1/58	33/8807	0.196232	0.432151	0.378306	THBS2	1
R-HSA-9609736	Assembly and cell surface presentation of NMDA receptors	1/58	33/8807	0.196232	0.432151	0.378306	TUBB3	1
R-HSA-192105	Synthesis of bile acids and bile salts	1/58	34/8807	0.201545	0.434097	0.38001	BAAT	1
R-HSA-390522	Striated Muscle Contraction	1/58	34/8807	0.201545	0.434097	0.38001	DES	1
R-HSA-111465	Apoptotic cleavage of cellular proteins	1/58	35/8807	0.206824	0.435887	0.381576	DSG3	1
R-HSA-437239	Recycling pathway of L1	1/58	35/8807	0.206824	0.435887	0.381576	TUBB3	1
R-HSA-140877	Formation of Fibrin Clot (Clotting Cascade)	1/58	36/8807	0.212068	0.435971	0.38165	SERPIND1	1
R-HSA-76009	Platelet Aggregation (Plug Formation)	1/58	36/8807	0.212068	0.435971	0.38165	COL1A1	1
R-HSA-9006934	Signaling by Receptor Tyrosine Kinases	5/58	485/8807	0.213644	0.435971	0.38165	COL1A1/THBS2/COL3A1/MDK/SPP1	5
R-HSA-202733	Cell surface interactions at the vascular wall	2/58	132/8807	0.215761	0.435971	0.38165	COL1A1/MMP1	2
R-HSA-419037	NCAM1 interactions	1/58	39/8807	0.227598	0.451209	0.39499	COL3A1	1
R-HSA-8957322	Metabolism of steroids	2/58	137/8807	0.227907	0.451209	0.39499	CYP24A1/BAAT	2
R-HSA-425397	Transport of vitamins, nucleosides, and related molecules	1/58	41/8807	0.237784	0.456917	0.399987	SLC28A3	1
R-HSA-6811436	COPI-independent Golgi-to-ER retrograde traffic	1/58	41/8807	0.237784	0.456917	0.399987	TUBB3	1
R-HSA-977606	Regulation of Complement cascade	1/58	41/8807	0.237784	0.456917	0.399987	CR2	1
R-HSA-6783783	Interleukin-10 signaling	1/58	42/8807	0.242827	0.457635	0.400615	CCL22	1
R-HSA-75153	Apoptotic execution phase	1/58	42/8807	0.242827	0.457635	0.400615	DSG3	1
R-HSA-194068	Bile acid and bile salt metabolism	1/58	43/8807	0.247837	0.458265	0.401166	BAAT	1
R-HSA-983189	Kinesins	1/58	43/8807	0.247837	0.458265	0.401166	TUBB3	1
R-HSA-1236978	Cross-presentation of soluble exogenous antigens (endosomes)	1/58	46/8807	0.262674	0.476704	0.417308	CD207	1
R-HSA-3371497	HSP90 chaperone cycle for steroid hormone receptors (SHR) in the presence of ligand	1/58	46/8807	0.262674	0.476704	0.417308	TUBB3	1
R-HSA-373076	Class A/1 (Rhodopsin-like receptors)	3/58	272/8807	0.265928	0.478182	0.418602	CXCL6/CXCL13/CCL22	3
R-HSA-1638091	Heparan sulfate/heparin (HS-GAG) metabolism	1/58	52/8807	0.291489	0.510106	0.446548	HS6ST2	1
R-HSA-166658	Complement cascade	1/58	52/8807	0.291489	0.510106	0.446548	CR2	1
R-HSA-917937	Iron uptake and transport	1/58	52/8807	0.291489	0.510106	0.446548	CP	1
R-HSA-3906995	Diseases associated with O-glycosylation of proteins	1/58	54/8807	0.300846	0.512746	0.448859	THBS2	1
R-HSA-5578775	Ion homeostasis	1/58	54/8807	0.300846	0.512746	0.448859	SLN	1
R-HSA-6794361	Neurexins and neuroligins	1/58	54/8807	0.300846	0.512746	0.448859	LRRTM1	1
R-HSA-936837	Ion transport by P-type ATPases	1/58	55/8807	0.305479	0.516153	0.451842	SLN	1
R-HSA-9033241	Peroxisomal protein import	1/58	57/8807	0.314654	0.527112	0.461436	BAAT	1
R-HSA-1445148	Translocation of SLC2A4 (GLUT4) to the plasma membrane	1/58	58/8807	0.319197	0.530191	0.464131	TUBB3	1
R-HSA-2995410	Nuclear Envelope (NE) Reassembly	1/58	59/8807	0.32371	0.533169	0.466738	TUBB3	1
R-HSA-375165	NCAM signaling for neurite out-growth	1/58	60/8807	0.328194	0.53605	0.46926	COL3A1	1
R-HSA-9609690	HCMV Early Events	1/58	61/8807	0.332649	0.538836	0.471698	TUBB3	1
R-HSA-211897	Cytochrome P450 - arranged by substrate type	1/58	63/8807	0.341471	0.544132	0.476335	CYP24A1	1
R-HSA-9663891	Selective autophagy	1/58	63/8807	0.341471	0.544132	0.476335	TUBB3	1
R-HSA-380320	Recruitment of NuMA to mitotic centrosomes	1/58	64/8807	0.345839	0.546649	0.478538	TUBB3	1
R-HSA-8852276	The role of GTSE1 in G2/M progression after G2 checkpoint	1/58	65/8807	0.350179	0.54908	0.480666	TUBB3	1
R-HSA-211859	Biological oxidations	2/58	195/8807	0.369008	0.574012	0.502492	CYP24A1/UGT1A6	2
R-HSA-438064	Post NMDA receptor activation events	1/58	72/8807	0.379774	0.586108	0.51308	TUBB3	1
R-HSA-9009391	Extra-nuclear estrogen signaling	1/58	74/8807	0.387983	0.5941	0.520077	MMP7	1
R-HSA-6811434	COPI-dependent Golgi-to-ER retrograde traffic	1/58	75/8807	0.392048	0.59567	0.521451	TUBB3	1
R-HSA-163125	Post-translational modification: synthesis of GPI-anchored proteins	1/58	79/8807	0.408043	0.605671	0.530206	THY1	1
R-HSA-5668914	Diseases of metabolism	2/58	213/8807	0.41125	0.605671	0.530206	THBS2/CYP24A1	2
R-HSA-390466	Chaperonin-mediated protein folding	1/58	80/8807	0.411977	0.605671	0.530206	TUBB3	1
R-HSA-9609646	HCMV Infection	1/58	80/8807	0.411977	0.605671	0.530206	TUBB3	1
R-HSA-425366	Transport of bile salts and organic acids, metal ions and amine compounds	1/58	81/8807	0.415885	0.605671	0.530206	CP	1
R-HSA-5173105	O-linked glycosylation	1/58	83/8807	0.423625	0.605671	0.530206	THBS2	1
R-HSA-9648025	EML4 and NUDC in mitotic spindle formation	1/58	83/8807	0.423625	0.605671	0.530206	TUBB3	1
R-HSA-391251	Protein folding	1/58	84/8807	0.427457	0.605671	0.530206	TUBB3	1
R-HSA-6794362	Protein-protein interactions at synapses	1/58	84/8807	0.427457	0.605671	0.530206	LRRTM1	1
R-HSA-442755	Activation of NMDA receptors and postsynaptic events	1/58	85/8807	0.431263	0.605671	0.530206	TUBB3	1
R-HSA-6807878	COPI-mediated anterograde transport	1/58	86/8807	0.435046	0.605671	0.530206	TUBB3	1
R-HSA-2500257	Resolution of Sister Chromatid Cohesion	1/58	87/8807	0.438803	0.605671	0.530206	TUBB3	1
R-HSA-8878159	Transcriptional regulation by RUNX3	1/58	87/8807	0.438803	0.605671	0.530206	SPP1	1
R-HSA-156580	Phase II - Conjugation of compounds	1/58	91/8807	0.453588	0.621701	0.544239	UGT1A6	1
R-HSA-1989781	PPARA activates gene expression	1/58	93/8807	0.460836	0.624461	0.546655	FHL2	1
R-HSA-5619102	SLC transporter disorders	1/58	94/8807	0.464425	0.624461	0.546655	CP	1
R-HSA-400206	Regulation of lipid metabolism by PPARalpha	1/58	95/8807	0.46799	0.624461	0.546655	FHL2	1
R-HSA-425407	SLC-mediated transmembrane transport	2/58	239/8807	0.469794	0.624461	0.546655	SLC28A3/CP	2
R-HSA-1236975	Antigen processing-Cross presentation	1/58	96/8807	0.471532	0.624461	0.546655	CD207	1
R-HSA-5610787	Hedgehog 'off' state	1/58	97/8807	0.475051	0.624899	0.547038	TUBB3	1
R-HSA-211945	Phase I - Functionalization of compounds	1/58	98/8807	0.478546	0.6253	0.54739	CYP24A1	1
R-HSA-1632852	Macroautophagy	1/58	101/8807	0.488897	0.627005	0.548882	TUBB3	1
R-HSA-373760	L1CAM interactions	1/58	102/8807	0.492302	0.627005	0.548882	TUBB3	1
R-HSA-449147	Signaling by Interleukins	3/58	402/8807	0.497674	0.627005	0.548882	IL13RA2/CCL22/MMP1	3
R-HSA-195721	Signaling by WNT	2/58	252/8807	0.497792	0.627005	0.548882	WNT10A/SFRP2	2
R-HSA-5663220	RHO GTPases Activate Formins	1/58	104/8807	0.499045	0.627005	0.548882	TUBB3	1
R-HSA-983705	Signaling by the B Cell Receptor (BCR)	1/58	104/8807	0.499045	0.627005	0.548882	CD79A	1
R-HSA-8856688	Golgi-to-ER retrograde transport	1/58	107/8807	0.508995	0.635433	0.55626	TUBB3	1
R-HSA-1630316	Glycosaminoglycan metabolism	1/58	109/8807	0.51552	0.639506	0.559825	HS6ST2	1
R-HSA-9612973	Autophagy	1/58	114/8807	0.531463	0.655137	0.573508	TUBB3	1
R-HSA-418594	G alpha (i) signalling events	2/58	271/8807	0.537034	0.657866	0.575898	CXCL6/CXCL13	2
R-HSA-3781865	Diseases of glycosylation	1/58	120/8807	0.549915	0.669461	0.586048	THBS2	1
R-HSA-5576891	Cardiac conduction	1/58	122/8807	0.555905	0.672576	0.588775	SLN	1
R-HSA-199977	ER to Golgi Anterograde Transport	1/58	126/8807	0.567652	0.682575	0.597528	TUBB3	1
R-HSA-5358351	Signaling by Hedgehog	1/58	128/8807	0.57341	0.684528	0.599238	TUBB3	1
R-HSA-983231	Factors involved in megakaryocyte development and platelet production	1/58	129/8807	0.576261	0.684528	0.599238	TUBB3	1
R-HSA-9609507	Protein localization	1/58	131/8807	0.581906	0.68707	0.601463	BAAT	1
R-HSA-5617833	Cilium Assembly	1/58	136/8807	0.595699	0.699144	0.612032	TUBB3	1
R-HSA-168898	Toll-like Receptor Cascades	1/58	141/8807	0.609044	0.706347	0.618338	CTSK	1
R-HSA-68877	Mitotic Prometaphase	1/58	141/8807	0.609044	0.706347	0.618338	TUBB3	1
R-HSA-2467813	Separation of Sister Chromatids	1/58	148/8807	0.627003	0.718562	0.629031	TUBB3	1
R-HSA-8939211	ESR-mediated signaling	1/58	148/8807	0.627003	0.718562	0.629031	MMP7	1
R-HSA-69275	G2/M Transition	1/58	155/8807	0.64415	0.718562	0.629031	TUBB3	1
R-HSA-157118	Signaling by NOTCH	1/58	157/8807	0.648905	0.718562	0.629031	MDK	1
R-HSA-453274	Mitotic G2-G2/M phases	1/58	157/8807	0.648905	0.718562	0.629031	TUBB3	1
R-HSA-6811442	Intra-Golgi and retrograde Golgi-to-ER traffic	1/58	157/8807	0.648905	0.718562	0.629031	TUBB3	1
R-HSA-8878171	Transcriptional regulation by RUNX1	1/58	157/8807	0.648905	0.718562	0.629031	CTSK	1
R-HSA-948021	Transport to the Golgi and subsequent modification	1/58	157/8807	0.648905	0.718562	0.629031	TUBB3	1
R-HSA-109581	Apoptosis	1/58	160/8807	0.655921	0.720743	0.63094	DSG3	1
R-HSA-201681	TCF dependent signaling in response to WNT	1/58	161/8807	0.658229	0.720743	0.63094	SFRP2	1
R-HSA-5619115	Disorders of transmembrane transporters	1/58	166/8807	0.669542	0.729057	0.638219	CP	1
R-HSA-68882	Mitotic Anaphase	1/58	186/8807	0.711229	0.763835	0.668663	TUBB3	1
R-HSA-2555396	Mitotic Metaphase and Anaphase	1/58	187/8807	0.713172	0.763835	0.668663	TUBB3	1
R-HSA-5357801	Programmed Cell Death	1/58	187/8807	0.713172	0.763835	0.668663	DSG3	1
R-HSA-112314	Neurotransmitter receptors and postsynaptic signal transmission	1/58	193/8807	0.724562	0.771816	0.67565	TUBB3	1
R-HSA-112316	Neuronal System	2/58	389/8807	0.733109	0.7767	0.679925	LRRTM1/TUBB3	2
R-HSA-1852241	Organelle biogenesis and maintenance	1/58	201/8807	0.739059	0.778794	0.681758	TUBB3	1
R-HSA-195258	RHO GTPase Effectors	1/58	220/8807	0.770552	0.807638	0.707008	TUBB3	1
R-HSA-76002	Platelet activation, signaling and aggregation	1/58	238/8807	0.796928	0.83084	0.727319	COL1A1	1
R-HSA-112315	Transmission across Chemical Synapses	1/58	255/8807	0.819091	0.848728	0.742979	TUBB3	1
R-HSA-446203	Asparagine N-linked glycosylation	1/58	258/8807	0.822747	0.848728	0.742979	TUBB3	1
R-HSA-71387	Metabolism of carbohydrates	1/58	269/8807	0.835543	0.856348	0.74965	HS6ST2	1
R-HSA-68886	M Phase	1/58	272/8807	0.838872	0.856348	0.74965	TUBB3	1
R-HSA-71291	Metabolism of amino acids and derivatives	1/58	323/8807	0.886317	0.895454	0.783883	DIO2	1
R-HSA-983169	Class I MHC mediated antigen processing & presentation	1/58	323/8807	0.886317	0.895454	0.783883	CD207	1
R-HSA-69278	Cell Cycle, Mitotic	1/58	393/8807	0.929806	0.934575	0.818129	TUBB3	1
R-HSA-1640170	Cell Cycle	1/58	488/8807	0.963751	0.963751	0.84367	TUBB3	1
