# Supplementary material for: Transcriptomic and network analysis identifies shared and unique pathways and immune changes across fibrotic interstitial lung diseases
Source: Aging (Albany NY). 2024 Feb 12;16(4):3200–30. doi: 10.18632/aging.205530 (PMC10929820; doi:10.18632/aging.205530)
Supplement: Supplementary Table 10 [file aging-16-205530-s010.xlsx]

## Sheet: KEGG Enrichment Analysis of Dow
Supplementary Table 10. KEGG enrichment analysis of down-regulated common differentially expressed genes.
ID	Description	GeneRatio	BgRatio	pvalue	p.adjust	qvalue	geneID	Count
R-HSA-1234158	Regulation of gene expression by Hypoxia-inducible Factor	2/23	11/8807	0.000353744	0.033252	0.0271825	EPAS1/HIF3A	2
R-HSA-452723	Transcriptional regulation of pluripotent stem cells	2/23	22/8807	0.00145999	0.0686194	0.0560943	EPAS1/HIF3A	2
R-HSA-500792	GPCR ligand binding	5/23	390/8807	0.00288269	0.0903242	0.0738373	GRM8/EDNRB/CCK/CHRM1/VIPR1	5
R-HSA-1234176	Oxygen-dependent proline hydroxylation of Hypoxia-inducible Factor Alpha	2/23	60/8807	0.0105334	0.199617	0.163181	EPAS1/HIF3A	2
R-HSA-416476	G alpha (q) signalling events	3/23	193/8807	0.0132874	0.199617	0.163181	EDNRB/CCK/CHRM1	3
R-HSA-1234174	Cellular response to hypoxia	2/23	69/8807	0.0137641	0.199617	0.163181	EPAS1/HIF3A	2
R-HSA-112315	Transmission across Chemical Synapses	3/23	255/8807	0.0276981	0.199617	0.163181	HTR3C/SLC6A4/GRIA1	3
R-HSA-1237044	Erythrocytes take up carbon dioxide and release oxygen	1/23	11/8807	0.0283709	0.199617	0.163181	CA4	1
R-HSA-1480926	O2/CO2 exchange in erythrocytes	1/23	11/8807	0.0283709	0.199617	0.163181	CA4	1
R-HSA-9664873	Pexophagy	1/23	11/8807	0.0283709	0.199617	0.163181	EPAS1	1
R-HSA-1475029	Reversible hydration of carbon dioxide	1/23	12/8807	0.0309115	0.199617	0.163181	CA4	1
R-HSA-879415	Advanced glycosylation endproduct receptor signaling	1/23	12/8807	0.0309115	0.199617	0.163181	AGER	1
R-HSA-879518	Transport of organic anions	1/23	12/8807	0.0309115	0.199617	0.163181	SLCO1A2	1
R-HSA-8851680	Butyrophilin (BTN) family interactions	1/23	12/8807	0.0309115	0.199617	0.163181	BTNL9	1
R-HSA-373076	Class A/1 (Rhodopsin-like receptors)	3/23	272/8807	0.0326872	0.199617	0.163181	EDNRB/CCK/CHRM1	3
R-HSA-166786	Creation of C4 and C2 activators	1/23	14/8807	0.0359737	0.199617	0.163181	FCN3	1
R-HSA-159418	Recycling of bile acids and salts	1/23	16/8807	0.0410107	0.199617	0.163181	SLCO1A2	1
R-HSA-416993	Trafficking of GluR2-containing AMPA receptors	1/23	16/8807	0.0410107	0.199617	0.163181	GRIA1	1
R-HSA-2022377	Metabolism of Angiotensinogen to Angiotensins	1/23	17/8807	0.0435197	0.199617	0.163181	MME	1
R-HSA-209776	Metabolism of amine-derived hormones	1/23	17/8807	0.0435197	0.199617	0.163181	PNMT	1
R-HSA-449836	Other interleukin signaling	1/23	19/8807	0.0485189	0.199617	0.163181	CSF3R	1
R-HSA-166663	Initial triggering of complement	1/23	20/8807	0.0510091	0.199617	0.163181	FCN3	1
R-HSA-8849932	Synaptic adhesion-like molecules	1/23	20/8807	0.0510091	0.199617	0.163181	GRIA1	1
R-HSA-438066	Unblocking of NMDA receptors, glutamate binding and activation	1/23	22/8807	0.0559709	0.199617	0.163181	GRIA1	1
R-HSA-933542	TRAF6 mediated NF-kB activation	1/23	22/8807	0.0559709	0.199617	0.163181	AGER	1
R-HSA-9705462	Inactivation of CSF3 (G-CSF) signaling	1/23	23/8807	0.0584424	0.199617	0.163181	CSF3R	1
R-HSA-9620244	Long-term potentiation	1/23	24/8807	0.0609078	0.199617	0.163181	GRIA1	1
R-HSA-9619665	EGR2 and SOX10-mediated initiation of Schwann cell myelination	1/23	26/8807	0.06582	0.199617	0.163181	PRX	1
R-HSA-375276	Peptide ligand-binding receptors	2/23	166/8807	0.069006	0.199617	0.163181	EDNRB/CCK	2
R-HSA-445989	TAK1 activates NFkB by phosphorylation and activation of IKKs complex	1/23	28/8807	0.0707077	0.199617	0.163181	AGER	1
R-HSA-9674555	Signaling by CSF3 (G-CSF)	1/23	28/8807	0.0707077	0.199617	0.163181	CSF3R	1
R-HSA-5694530	Cargo concentration in the ER	1/23	29/8807	0.0731423	0.199617	0.163181	GRIA1	1
R-HSA-9616222	Transcriptional regulation of granulopoiesis	1/23	29/8807	0.0731423	0.199617	0.163181	CSF3R	1
R-HSA-399719	Trafficking of AMPA receptors	1/23	30/8807	0.0755709	0.199617	0.163181	GRIA1	1
R-HSA-399721	Glutamate binding, activation of AMPA receptors and synaptic plasticity	1/23	30/8807	0.0755709	0.199617	0.163181	GRIA1	1
R-HSA-112316	Neuronal System	3/23	389/8807	0.0787701	0.199617	0.163181	HTR3C/SLC6A4/GRIA1	3
R-HSA-2514859	Inactivation, recovery and regulation of the phototransduction cascade	1/23	33/8807	0.08282	0.199617	0.163181	RGS9BP	1
R-HSA-420092	Glucagon-type ligand receptors	1/23	33/8807	0.08282	0.199617	0.163181	VIPR1	1
R-HSA-420499	Class C/3 (Metabotropic glutamate/pheromone receptors)	1/23	33/8807	0.08282	0.199617	0.163181	GRM8	1
R-HSA-2514856	The phototransduction cascade	1/23	34/8807	0.0852243	0.200277	0.16372	RGS9BP	1
R-HSA-112314	Neurotransmitter receptors and postsynaptic signal transmission	2/23	193/8807	0.0895177	0.205236	0.167774	HTR3C/GRIA1	2
R-HSA-8951664	Neddylation	2/23	204/8807	0.0983476	0.217564	0.177852	EPAS1/HIF3A	2
R-HSA-375280	Amine ligand-binding receptors	1/23	40/8807	0.0995238	0.217564	0.177852	CHRM1	1
R-HSA-425397	Transport of vitamins, nucleosides, and related molecules	1/23	41/8807	0.101886	0.217666	0.177935	SLCO1A2	1
R-HSA-194068	Bile acid and bile salt metabolism	1/23	43/8807	0.106593	0.222612	0.181979	SLCO1A2	1
R-HSA-913709	O-linked glycosylation of mucins	1/23	44/8807	0.108938	0.222612	0.181979	GALNT13	1
R-HSA-166658	Complement cascade	1/23	52/8807	0.127484	0.244561	0.199921	FCN3	1
R-HSA-8848021	Signaling by PTK6	1/23	52/8807	0.127484	0.244561	0.199921	EPAS1	1
R-HSA-9006927	Signaling by Non-Receptor Tyrosine Kinases	1/23	52/8807	0.127484	0.244561	0.199921	EPAS1	1
R-HSA-204005	COPII-mediated vesicle transport	1/23	54/8807	0.132063	0.248278	0.20296	GRIA1	1
R-HSA-9663891	Selective autophagy	1/23	63/8807	0.152383	0.280745	0.2295	EPAS1	1
R-HSA-168928	DDX58/IFIH1-mediated induction of interferon-alpha/beta	1/23	70/8807	0.167873	0.280745	0.2295	AGER	1
R-HSA-438064	Post NMDA receptor activation events	1/23	72/8807	0.172248	0.280745	0.2295	GRIA1	1
R-HSA-2980736	Peptide hormone metabolism	1/23	77/8807	0.183091	0.280745	0.2295	MME	1
R-HSA-168142	Toll Like Receptor 10 (TLR10) Cascade	1/23	78/8807	0.185244	0.280745	0.2295	AGER	1
R-HSA-168176	Toll Like Receptor 5 (TLR5) Cascade	1/23	78/8807	0.185244	0.280745	0.2295	AGER	1
R-HSA-975871	MyD88 cascade initiated on plasma membrane	1/23	78/8807	0.185244	0.280745	0.2295	AGER	1
R-HSA-5173105	O-linked glycosylation	1/23	83/8807	0.195924	0.280745	0.2295	GALNT13	1
R-HSA-975138	TRAF6 mediated induction of NFkB and MAP kinases upon TLR7/8 or 9 activation	1/23	83/8807	0.195924	0.280745	0.2295	AGER	1
R-HSA-6794362	Protein-protein interactions at synapses	1/23	84/8807	0.198044	0.280745	0.2295	GRIA1	1
R-HSA-975155	MyD88 dependent cascade initiated on endosome	1/23	84/8807	0.198044	0.280745	0.2295	AGER	1
R-HSA-168181	Toll Like Receptor 7/8 (TLR7/8) Cascade	1/23	85/8807	0.200158	0.280745	0.2295	AGER	1
R-HSA-442755	Activation of NMDA receptors and postsynaptic events	1/23	85/8807	0.200158	0.280745	0.2295	GRIA1	1
R-HSA-373080	Class B/2 (Secretin family receptors)	1/23	86/8807	0.202267	0.280745	0.2295	VIPR1	1
R-HSA-168138	Toll Like Receptor 9 (TLR9) Cascade	1/23	87/8807	0.204371	0.280745	0.2295	AGER	1
R-HSA-168164	Toll Like Receptor 3 (TLR3) Cascade	1/23	88/8807	0.20647	0.280745	0.2295	AGER	1
R-HSA-166166	MyD88-independent TLR4 cascade	1/23	92/8807	0.214811	0.280745	0.2295	AGER	1
R-HSA-2187338	Visual phototransduction	1/23	92/8807	0.214811	0.280745	0.2295	RGS9BP	1
R-HSA-937061	TRIF(TICAM1)-mediated TLR4 signaling	1/23	92/8807	0.214811	0.280745	0.2295	AGER	1
R-HSA-166058	MyD88:MAL(TIRAP) cascade initiated on plasma membrane	1/23	94/8807	0.21895	0.280745	0.2295	AGER	1
R-HSA-168188	Toll Like Receptor TLR6:TLR2 Cascade	1/23	94/8807	0.21895	0.280745	0.2295	AGER	1
R-HSA-9020702	Interleukin-1 signaling	1/23	94/8807	0.21895	0.280745	0.2295	AGER	1
R-HSA-168179	Toll Like Receptor TLR1:TLR2 Cascade	1/23	95/8807	0.221012	0.280745	0.2295	AGER	1
R-HSA-181438	Toll Like Receptor 2 (TLR2) Cascade	1/23	95/8807	0.221012	0.280745	0.2295	AGER	1
R-HSA-1632852	Macroautophagy	1/23	101/8807	0.233274	0.29237	0.239003	EPAS1	1
R-HSA-9612973	Autophagy	1/23	114/8807	0.25921	0.320602	0.262083	EPAS1	1
R-HSA-198933	Immunoregulatory interactions between a Lymphoid and a non-Lymphoid cell	1/23	117/8807	0.265076	0.323599	0.264532	KLRF1	1
R-HSA-9660821	ADORA2B mediated anti-inflammatory cytokines production	1/23	124/8807	0.278589	0.324349	0.265145	VIPR1	1
R-HSA-166016	Toll Like Receptor 4 (TLR4) Cascade	1/23	125/8807	0.280499	0.324349	0.265145	AGER	1
R-HSA-446652	Interleukin-1 family signaling	1/23	125/8807	0.280499	0.324349	0.265145	AGER	1
R-HSA-199977	ER to Golgi Anterograde Transport	1/23	126/8807	0.282406	0.324349	0.265145	GRIA1	1
R-HSA-449147	Signaling by Interleukins	2/23	402/8807	0.282942	0.324349	0.265145	AGER/CSF3R	2
R-HSA-6798695	Neutrophil degranulation	2/23	411/8807	0.291801	0.330473	0.270152	MME/PTPRB	2
R-HSA-418555	G alpha (s) signalling events	1/23	133/8807	0.295613	0.330806	0.270423	VIPR1	1
R-HSA-8957322	Metabolism of steroids	1/23	137/8807	0.303056	0.335144	0.27397	SLCO1A2	1
R-HSA-168898	Toll-like Receptor Cascades	1/23	141/8807	0.310423	0.3393	0.277367	AGER	1
R-HSA-948021	Transport to the Golgi and subsequent modification	1/23	157/8807	0.339155	0.360064	0.294342	GRIA1	1
R-HSA-9662851	Anti-inflammatory response favouring Leishmania parasite infection	1/23	158/8807	0.340912	0.360064	0.294342	VIPR1	1
R-HSA-9664433	Leishmania parasite growth and survival	1/23	158/8807	0.340912	0.360064	0.294342	VIPR1	1
R-HSA-9658195	Leishmania infection	1/23	238/8807	0.467889	0.484789	0.3963	VIPR1	1
R-HSA-425407	SLC-mediated transmembrane transport	1/23	239/8807	0.469317	0.484789	0.3963	SLCO1A2	1
R-HSA-446203	Asparagine N-linked glycosylation	1/23	258/8807	0.495767	0.506545	0.414085	GRIA1	1
R-HSA-418594	G alpha (i) signalling events	1/23	271/8807	0.513133	0.51865	0.423981	GRM8	1
R-HSA-71291	Metabolism of amino acids and derivatives	1/23	323/8807	0.577044	0.577044	0.471715	PNMT	1
